# Supplementary material for: Short- and long-term comparative effectiveness of nirmatrelvir/ritonavir and molnupiravir in asthma patients: a cohort study
Source: Springer Nature journal article supplement (doi:10.1186/s12931-025-03156-2), 2025-02-28
Supplement: MOESM1 [file 12931_2025_3156_MOESM1_ESM.pdf]

## Supplementary materials

### Contents

|                                                                                                                                                                                                                                                                                                                                  |    |
|----------------------------------------------------------------------------------------------------------------------------------------------------------------------------------------------------------------------------------------------------------------------------------------------------------------------------------|----|
| Supplement Tables.....                                                                                                                                                                                                                                                                                                           | 5  |
| Supplement Table 1. Asthma medications considered in this study .....                                                                                                                                                                                                                                                            | 5  |
| Supplement Table 2. ICD-9-CM codes relevant to outcomes .....                                                                                                                                                                                                                                                                    | 5  |
| Supplement Table 3. ICD-9-CM codes for selected comorbidities .....                                                                                                                                                                                                                                                              | 6  |
| Supplement Table 4A. Patient characteristics before weighting with standardized mean differences between the nirmatrelvir-ritonavir group and the control group.....                                                                                                                                                             | 7  |
| Supplement Table 4B. Patient characteristics before weighting with standardized mean differences between the molnupiravir group and the control group .....                                                                                                                                                                      | 8  |
| Supplement Table 4C. Patient characteristics before weighting with standardized mean differences between the nirmatrelvir-ritonavir group and the molnupiravir group .....                                                                                                                                                       | 9  |
| Supplement Table 5A. Patient characteristics after weighting with standardized mean differences between the nirmatrelvir-ritonavir group and the control group.....                                                                                                                                                              | 10 |
| Supplement Table 5B. Patient characteristics after weighting with standardized mean differences between the molnupiravir group and the control group .....                                                                                                                                                                       | 11 |
| Supplement Table 5C. Patient characteristics after weighting with standardized mean differences between the nirmatrelvir-ritonavir group and the molnupiravir group .....                                                                                                                                                        | 12 |
| Supplement Table 6. Proportions of patients with moderate to severe COVID-19 at baseline based on prescription of concomitant pharmacological treatments.....                                                                                                                                                                    | 13 |
| Supplement Table 7. Sensitivity analysis 1: Patient characteristics in the comparison between the molnupiravir group and control group with the start of the study period as the date when molnupiravir became available (Feb. 26, 2022) and without excluding individuals with contraindications to nirmatrelvir/ritonavir..... | 14 |
| Supplement Figures .....                                                                                                                                                                                                                                                                                                         | 15 |
| Supplement Figure 1A. Standardized mean difference for each covariate in the comparison between the nirmatrelvir/ritonavir group and control group for the outcome of death (day 0–30) before and after weighting .....                                                                                                          | 15 |
| Supplement Figure 1B. Standardized mean difference for each covariate in the comparison between the molnupiravir group and control group for the outcome of death (day 0–30) before and after weighting.....                                                                                                                     | 16 |
| Supplement Figure 1C. Standardized mean difference for each covariate in the comparison between the nirmatrelvir/ritonavir group and molnupiravir group for the outcome of death (day 0–30) before and after weighting .....                                                                                                     | 17 |
| Supplement Figure 2A. Standardized mean difference for each covariate in the comparison between the nirmatrelvir/ritonavir group and control group for the outcome of death (day 31–365) before and after weighting .....                                                                                                        | 18 |
| Supplement Figure 2B. Standardized mean difference for each covariate in the comparison between the molnupiravir group and control group for the outcome of death (day 31–365) before and after weighting.....                                                                                                                   | 19 |

|                                                                                                                                                                                                                                                              |    |
|--------------------------------------------------------------------------------------------------------------------------------------------------------------------------------------------------------------------------------------------------------------|----|
| Supplement Figure 2C. Standardized mean difference for each covariate in the comparison between the nirmatrelvir/ritonavir group and molnupiravir group for the outcome of death (day 31–365) before and after weighting .....                               | 20 |
| Supplement Figure 3A. Standardized mean difference for each covariate in the comparison between the nirmatrelvir/ritonavir group and control group for the outcome of ICU admission or respiratory support (day 0–30) before and after weighting.....        | 21 |
| Supplement Figure 3B. Standardized mean difference for each covariate in the comparison between the molnupiravir group and control group for the outcome of ICU admission or respiratory support (day 0–30) before and after weighting .....                 | 22 |
| Supplement Figure 3C. Standardized mean difference for each covariate in the comparison between the nirmatrelvir/ritonavir group and molnupiravir group for the outcome of ICU admission or respiratory support (day 0–30) before and after weighting.....   | 23 |
| Supplement Figure 4A. Standardized mean difference for each covariate in the comparison between the nirmatrelvir/ritonavir group and control group for the outcome of ICU admission or respiratory support (day 31–365) before and after weighting.....      | 24 |
| Supplement Figure 4B. Standardized mean difference for each covariate in the comparison between the molnupiravir group and control group for the outcome of ICU admission or respiratory support (day 31–365) before and after weighting .....               | 25 |
| Supplement Figure 4C. Standardized mean difference for each covariate in the comparison between the nirmatrelvir/ritonavir group and molnupiravir group for the outcome of ICU admission or respiratory support (day 31–365) before and after weighting..... | 26 |
| Supplement Figure 5A. Standardized mean difference for each covariate in the comparison between the nirmatrelvir/ritonavir group and control group for the outcome of all-cause hospitalization before and after weighting .....                             | 27 |
| Supplement Figure 5B. Standardized mean difference for each covariate in the comparison between the molnupiravir group and control group for the outcome of all-cause hospitalization before and after weighting .....                                       | 28 |
| Supplement Figure 5C. Standardized mean difference for each covariate in the comparison between the nirmatrelvir/ritonavir group and molnupiravir group for the outcome of all-cause hospitalization before and after weighting .....                        | 29 |
| Supplement Figure 6A. Standardized mean difference for each covariate in the comparison between the nirmatrelvir/ritonavir group and control group for the outcome of chronic pulmonary disease excluding asthma before and after weighting.....             | 30 |
| Supplement Figure 6B. Standardized mean difference for each covariate in the comparison between the molnupiravir group and control group for the outcome of chronic pulmonary disease excluding asthma before and after weighting .....                      | 31 |
| Supplement Figure 6C. Standardized mean difference for each covariate in the comparison between the nirmatrelvir/ritonavir group and molnupiravir group for the outcome of chronic pulmonary disease excluding asthma before and after weighting.....        | 32 |
| Supplement Figure 7A. Standardized mean difference for each covariate in the comparison between the nirmatrelvir/ritonavir group and control group for the outcome of acute respiratory distress syndrome before and after weighting.....                    | 33 |
| Supplement Figure 7B. Standardized mean difference for each covariate in the comparison between the molnupiravir group and control group for the outcome of acute respiratory distress syndrome before and after weighting.....                              | 34 |

|                                                                                                                                                                                                                                                 |    |
|-------------------------------------------------------------------------------------------------------------------------------------------------------------------------------------------------------------------------------------------------|----|
| Supplement Figure 7C. Standardized mean difference for each covariate in the comparison between the nirmatrelvir/ritonavir group and molnupiravir group for the outcome of acute respiratory distress syndrome before and after weighting ..... | 35 |
| Supplement Figure 8A. Standardized mean difference for each covariate in the comparison between the nirmatrelvir/ritonavir group and control group for the outcome of myocardial infarction before and after weighting .....                    | 36 |
| Supplement Figure 8B. Standardized mean difference for each covariate in the comparison between the molnupiravir group and control group for the outcome of myocardial infarction before and after weighting .....                              | 37 |
| Supplement Figure 8C. Standardized mean difference for each covariate in the comparison between the nirmatrelvir/ritonavir group and molnupiravir group for the outcome of myocardial infarction before and after weighting .....               | 38 |
| Supplement Figure 9A. Standardized mean difference for each covariate in the comparison between the nirmatrelvir/ritonavir group and control group for the outcome of stroke before and after weighting .....                                   | 39 |
| Supplement Figure 9B. Standardized mean difference for each covariate in the comparison between the molnupiravir group and control group for the outcome of stroke before and after weighting .....                                             | 40 |
| Supplement Figure 9C. Standardized mean difference for each covariate in the comparison between the nirmatrelvir/ritonavir group and molnupiravir group for the outcome of stroke before and after weighting .....                              | 41 |
| Supplement Figure 10A. Standardized mean difference for each covariate in the comparison between the nirmatrelvir/ritonavir group and control group for the outcome of asthma exacerbation before and after weighting .....                     | 42 |
| Supplement Figure 10B. Standardized mean difference for each covariate in the comparison between the molnupiravir group and control group for the outcome of asthma exacerbation before and after weighting .....                               | 43 |
| Supplement Figure 10C. Standardized mean difference for each covariate in the comparison between the nirmatrelvir/ritonavir group and molnupiravir group for the outcome of asthma exacerbation before and after weighting .....                | 44 |
| Supplement Figure 11A. Scaled Schoenfeld residual plots for the comparison between the nirmatrelvir/ritonavir group and control group .....                                                                                                     | 45 |
| Supplement Figure 11B. Scaled Schoenfeld residual plots for the comparison between the molnupiravir group and control group .....                                                                                                               | 46 |
| Supplement Figure 11C. Scaled Schoenfeld residual plots for the comparison between the nirmatrelvir/ritonavir group and molnupiravir group .....                                                                                                | 47 |
| Supplement Figure 12A. Subgroup analysis: vaccination status in the comparison between the nirmatrelvir/ritonavir group and control group .....                                                                                                 | 48 |
| Supplement Figure 12B. Subgroup analysis: vaccination status in the comparison between the molnupiravir group and control group .....                                                                                                           | 49 |
| Supplement Figure 12C. Subgroup analysis: vaccination status in the comparison between the nirmatrelvir/ritonavir group and molnupiravir group .....                                                                                            | 50 |
| Supplement Figure 13A. Subgroup analysis: inhaled corticosteroid (ICS) dose level in the comparison between the nirmatrelvir/ritonavir group and control group .....                                                                            | 51 |

|                                                                                                                                                                                                                                                                                                      |    |
|------------------------------------------------------------------------------------------------------------------------------------------------------------------------------------------------------------------------------------------------------------------------------------------------------|----|
| Supplement Figure 13B. Subgroup analysis: inhaled corticosteroid (ICS) dose level in the comparison between the molnupiravir group and control group.....                                                                                                                                            | 52 |
| Supplement Figure 13C. Subgroup analysis: inhaled corticosteroid (ICS) dose level in the comparison between the nirmatrelvir/ritonavir group and molnupiravir group .....                                                                                                                            | 53 |
| Supplement Figure 14A. Subgroup analysis: hospital admission on index date in the comparison between the nirmatrelvir/ritonavir group and control group.....                                                                                                                                         | 54 |
| Supplement Figure 14B. Subgroup analysis: hospital admission on index date in the comparison between the molnupiravir group and control group.....                                                                                                                                                   | 55 |
| Supplement Figure 14C. Subgroup analysis: hospital admission on index date in the comparison between the nirmatrelvir/ritonavir group and molnupiravir group .....                                                                                                                                   | 56 |
| Supplement Figure 15. Sensitivity analysis 1: Comparison between the molnupiravir group and control group with the start of the study period as the date when molnupiravir became available (Feb. 26, 2022) and without excluding individuals with contraindications to nirmatrelvir/ritonavir ..... | 57 |
| Supplement Figure 16. Sensitivity analysis 2: Comparison between the nirmatrelvir/ritonavir group and control group excluding patients who were prescribed salmeterol within 10 days of the index date .....                                                                                         | 58 |
| Supplement Figure 17. Sensitivity analysis 3: Comparison between the nirmatrelvir/ritonavir group and molnupiravir group excluding patients who were prescribed salmeterol within 10 days of the index date.....                                                                                     | 59 |
| References .....                                                                                                                                                                                                                                                                                     | 60 |



## Supplement Tables

**Supplement Table 1. Asthma medications considered in this study [1]**

|                                                                           |                                                                                                                                                                                                    |
|---------------------------------------------------------------------------|----------------------------------------------------------------------------------------------------------------------------------------------------------------------------------------------------|
| Short-acting beta <sub>2</sub> agonist (SABA)                             | salbutamol, terbutaline                                                                                                                                                                            |
| Inhaled corticosteroid (ICS) alone<br>or in combination with LABA or LAMA | atectura, beclomethasone, budesonide, budesonide + formoterol,<br>ciclesonide, enerzair, fluticasone, flutiform, relvar ellipta,<br>salmeterol xinafoate + fluticasone propionate, trelegy ellipta |
| Others                                                                    | aminophylline, ipratropium, montelukast, salmeterol, tiotropium, theophylline                                                                                                                      |

LABA: long-acting beta<sub>2</sub> agonist. LAMA: long-acting muscarinic antagonist.

**Supplement Table 2. ICD-9-CM codes relevant to outcomes [2]**

| Conditions                                 | ICD-9-CM codes                                            |
|--------------------------------------------|-----------------------------------------------------------|
| Respiratory support                        | 39.65, 93.90, 93.95, 93.96, 96.04, 96.7x                  |
| Chronic pulmonary disease excluding asthma | 416.8, 416.9, 490.x–492.x, 494–505.x, 506.4, 508.1, 508.8 |
| Acute respiratory distress syndrome        | 518.51, 518.52, 518.53, 518.8                             |
| Myocardial infarction                      | 410                                                       |
| Stroke                                     | 430–437.x                                                 |

**Supplement Table 3. ICD-9-CM codes for selected comorbidities [3]**

| <b>Comorbidity</b>                    | <b>ICD-9-CM code</b>                                                                                                                            |
|---------------------------------------|-------------------------------------------------------------------------------------------------------------------------------------------------|
| Arrhythmia                            | 426.0, 426.13, 426.7, 426.9, 426.10, 426.12, 427.0, 427.1, 427.2, 427.3, 427.4, 427.6, 427.7, 427.8, 427.9, 785.0, 996.01, 996.04, V45.0, V53.3 |
| Cerebrovascular disease               | 362.34, 430.x-438.x                                                                                                                             |
| Chronic obstructive pulmonary disease | 496                                                                                                                                             |
| Congestive heart failure              | 398.91, 402.01, 402.11, 402.91, 404.01, 404.03, 404.11, 404.13, 404.91, 404.93, 425.4-425.9, 428.x                                              |
| Coronary artery disease               | 410.x-414.x, V45.81                                                                                                                             |
| Diabetes                              | 250.x                                                                                                                                           |
| Hypertension                          | 401.x-405.x                                                                                                                                     |
| Liver disease                         | 070.22, 070.23, 070.32, 070.33, 070.44, 070.54, 070.6, 070.9, 456.0-456.2, 570.x, 571.x, 572.2-572.8, 573.3, 573.4, 573.8, 573.9, V42.7         |
| Malignancy                            | 140.x-172.x, 174.x-208.x, 238.6                                                                                                                 |
| Renal disease                         | 403.01, 403.11, 403.91, 404.02, 404.03, 404.12, 404.13, 404.92, 404.93, 582.x, 583.0-583.7, 585.x, 586.x, 588.0, V42.0, V45.1, V56.x            |

**Supplement Table 4A. Patient characteristics before weighting with standardized mean differences between the nirmatrelvir-ritonavir group and the control group**

|                                           | Control              | N/R                  | SMD  |
|-------------------------------------------|----------------------|----------------------|------|
| N                                         | 746                  | 621                  |      |
| Age (median [IQR])                        | 72.00 [50.00, 85.00] | 70.00 [55.00, 80.00] | 0.01 |
| Sex                                       |                      |                      |      |
| Female (%)                                | 431 (57.8)           | 384 (61.8)           | 0.08 |
| Male (%)                                  | 315 (42.2)           | 237 (38.2)           | 0.08 |
| Vaccination status (%)                    |                      |                      | 0.44 |
| Unvaccinated                              | 165 (22.1)           | 73 (11.8)            |      |
| 1-2 doses                                 | 222 (29.8)           | 118 (19.0)           |      |
| 3 or more doses                           | 359 (48.1)           | 430 (69.2)           |      |
| Hospital admission (%)                    | 336 (45.0)           | 241 (38.8)           | 0.13 |
| Concomitant pharmacological treatments    |                      |                      |      |
| Dexamethasone (%)                         | 147 (19.7)           | 28 (4.5)             | 0.48 |
| Prednisolone (%)                          | 49 (6.6)             | 36 (5.8)             | 0.03 |
| Remdesivir (%)                            | 134 (18.0)           | 12 (1.9)             | 0.56 |
| Comorbidity                               |                      |                      |      |
| Arrhythmia (%)                            | 71 (9.5)             | 29 (4.7)             | 0.19 |
| Cerebrovascular disease (%)               | 57 (7.6)             | 25 (4.0)             | 0.16 |
| Chronic obstructive pulmonary disease (%) | 106 (14.2)           | 55 (8.9)             | 0.17 |
| Congestive heart failure (%)              | 104 (13.9)           | 31 (5.0)             | 0.31 |
| Coronary artery disease (%)               | 86 (11.5)            | 36 (5.8)             | 0.21 |
| Diabetes (%)                              | 94 (12.6)            | 47 (7.6)             | 0.17 |
| Hypertension (%)                          | 179 (24.0)           | 109 (17.6)           | 0.16 |
| Liver disease (%)                         | 31 (4.2)             | 15 (2.4)             | 0.10 |
| Malignancy (%)                            | 40 (5.4)             | 26 (4.2)             | 0.06 |
| Renal disease (%)                         | 12 (1.6)             | 5 (0.8)              | 0.07 |
| Recent use of an oral glucocorticoid (%)  | 223 (29.9)           | 108 (17.4)           | 0.30 |
| ICS dose (%)                              |                      |                      | 0.12 |
| None                                      | 258 (34.6)           | 239 (38.5)           |      |
| Low                                       | 147 (19.7)           | 133 (21.4)           |      |
| Medium                                    | 252 (33.8)           | 186 (30.0)           |      |
| High                                      | 89 (11.9)            | 63 (10.1)            |      |

N/R: nirmatrelvir-ritonavir. SMD: standardized mean difference.

**Supplement Table 4B. Patient characteristics before weighting with standardized mean differences between the molnupiravir group and the control group**

|                                           | Control              | Molnupiravir         | SMD  |
|-------------------------------------------|----------------------|----------------------|------|
| N                                         | 746                  | 378                  |      |
| Age (median [IQR])                        | 72.00 [50.00, 85.00] | 77.00 [67.00, 86.00] | 0.42 |
| Sex                                       |                      |                      |      |
| Female (%)                                | 431 (57.8)           | 227 (60.1)           | 0.05 |
| Male (%)                                  | 315 (42.2)           | 151 (39.9)           | 0.05 |
| Vaccination status (%)                    |                      |                      | 0.24 |
| Unvaccinated                              | 165 (22.1)           | 71 (18.8)            |      |
| 1-2 doses                                 | 222 (29.8)           | 82 (21.7)            |      |
| 3 or more doses                           | 359 (48.1)           | 225 (59.5)           |      |
| Hospital admission (%)                    | 336 (45.0)           | 156 (41.3)           | 0.08 |
| Concomitant pharmacological treatments    |                      |                      |      |
| Dexamethasone (%)                         | 147 (19.7)           | 11 (2.9)             | 0.55 |
| Prednisolone (%)                          | 49 (6.6)             | 28 (7.4)             | 0.03 |
| Remdesivir (%)                            | 134 (18.0)           | 5 (1.3)              | 0.59 |
| Comorbidity                               |                      |                      |      |
| Arrhythmia (%)                            | 71 (9.5)             | 75 (19.8)            | 0.30 |
| Cerebrovascular disease (%)               | 57 (7.6)             | 46 (12.2)            | 0.15 |
| Chronic obstructive pulmonary disease (%) | 106 (14.2)           | 40 (10.6)            | 0.11 |
| Congestive heart failure (%)              | 104 (13.9)           | 58 (15.3)            | 0.04 |
| Coronary artery disease (%)               | 86 (11.5)            | 46 (12.2)            | 0.02 |
| Diabetes (%)                              | 94 (12.6)            | 57 (15.1)            | 0.07 |
| Hypertension (%)                          | 179 (24.0)           | 114 (30.2)           | 0.14 |
| Liver disease (%)                         | 31 (4.2)             | 23 (6.1)             | 0.09 |
| Malignancy (%)                            | 40 (5.4)             | 33 (8.7)             | 0.13 |
| Renal disease (%)                         | 12 (1.6)             | 22 (5.8)             | 0.22 |
| Recent use of an oral glucocorticoid (%)  | 223 (29.9)           | 106 (28.0)           | 0.04 |
| ICS dose (%)                              |                      |                      | 0.21 |
| None                                      | 258 (34.6)           | 109 (28.8)           |      |
| Low                                       | 147 (19.7)           | 71 (18.8)            |      |
| Medium                                    | 252 (33.8)           | 127 (33.6)           |      |
| High                                      | 89 (11.9)            | 71 (18.8)            |      |

SMD: standardized mean difference.

**Supplement Table 4C. Patient characteristics before weighting with standardized mean differences between the nirmatrelvir-ritonavir group and the molnupiravir group**

|                                           | Molnupiravir         | N/R                  | SMD  |
|-------------------------------------------|----------------------|----------------------|------|
| N                                         | 378                  | 621                  |      |
| Age (median [IQR])                        | 77.00 [67.00, 86.00] | 70.00 [55.00, 80.00] | 0.47 |
| Sex                                       |                      |                      |      |
| Female (%)                                | 227 (60.1)           | 384 (61.8)           | 0.04 |
| Male (%)                                  | 151 (39.9)           | 237 (38.2)           | 0.04 |
| Vaccination status (%)                    |                      |                      | 0.23 |
| Unvaccinated                              | 71 (18.8)            | 73 (11.8)            |      |
| 1-2 doses                                 | 82 (21.7)            | 118 (19.0)           |      |
| 3 or more doses                           | 225 (59.5)           | 430 (69.2)           |      |
| Hospital admission (%)                    | 156 (41.3)           | 241 (38.8)           | 0.05 |
| Concomitant pharmacological treatments    |                      |                      |      |
| Dexamethasone (%)                         | 11 (2.9)             | 28 (4.5)             | 0.09 |
| Prednisolone (%)                          | 28 (7.4)             | 36 (5.8)             | 0.07 |
| Remdesivir (%)                            | 5 (1.3)              | 12 (1.9)             | 0.05 |
| Comorbidity                               |                      |                      |      |
| Arrhythmia (%)                            | 75 (19.8)            | 29 (4.7)             | 0.48 |
| Cerebrovascular disease (%)               | 46 (12.2)            | 25 (4.0)             | 0.30 |
| Chronic obstructive pulmonary disease (%) | 40 (10.6)            | 55 (8.9)             | 0.06 |
| Congestive heart failure (%)              | 58 (15.3)            | 31 (5.0)             | 0.35 |
| Coronary artery disease (%)               | 46 (12.2)            | 36 (5.8)             | 0.22 |
| Diabetes (%)                              | 57 (15.1)            | 47 (7.6)             | 0.24 |
| Hypertension (%)                          | 114 (30.2)           | 109 (17.6)           | 0.30 |
| Liver disease (%)                         | 23 (6.1)             | 15 (2.4)             | 0.18 |
| Malignancy (%)                            | 33 (8.7)             | 26 (4.2)             | 0.19 |
| Renal disease (%)                         | 22 (5.8)             | 5 (0.8)              | 0.28 |
| Recent use of an oral glucocorticoid (%)  | 106 (28.0)           | 108 (17.4)           | 0.26 |
| ICS dose (%)                              |                      |                      | 0.30 |
| None                                      | 109 (28.8)           | 239 (38.5)           |      |
| Low                                       | 71 (18.8)            | 133 (21.4)           |      |
| Medium                                    | 127 (33.6)           | 186 (30.0)           |      |
| High                                      | 71 (18.8)            | 63 (10.1)            |      |

N/R: nirmatrelvir-ritonavir. SMD: standardized mean difference.

**Supplement Table 5A. Patient characteristics after weighting with standardized mean differences between the nirmatrelvir-ritonavir group and the control group**

|                                           | Control              | N/R                  | SMD  |
|-------------------------------------------|----------------------|----------------------|------|
| N                                         | 681.1                | 621.0                |      |
| Age (median [IQR])                        | 72.00 [51.00, 85.00] | 70.00 [54.25, 80.00] | 0.07 |
| Sex                                       |                      |                      |      |
| Female (%)                                | 432.6 (63.5)         | 384.0 (61.8)         | 0.04 |
| Male (%)                                  | 248.5 (36.5)         | 237.0 (38.2)         | 0.04 |
| Vaccination status (%)                    |                      |                      | 0.07 |
| Unvaccinated                              | 67.6 ( 9.9)          | 73.0 (11.8)          |      |
| 1-2 doses                                 | 123.4 (18.1)         | 118.0 (19.0)         |      |
| 3 or more doses                           | 490.0 (71.9)         | 430.0 (69.2)         |      |
| Hospital admission (%)                    | 288.7 (42.4)         | 241.0 (38.8)         | 0.07 |
| Concomitant pharmacological treatments    |                      |                      |      |
| Dexamethasone (%)                         | 34.2 ( 5.0)          | 28.0 ( 4.5)          | 0.02 |
| Prednisolone (%)                          | 39.5 ( 5.8)          | 36.0 ( 5.8)          | 0.00 |
| Remdesivir (%)                            | 12.8 ( 1.9)          | 12.0 ( 1.9)          | 0.00 |
| Comorbidity                               |                      |                      |      |
| Arrhythmia (%)                            | 26.4 ( 3.9)          | 29.0 ( 4.7)          | 0.04 |
| Cerebrovascular disease (%)               | 29.3 ( 4.3)          | 25.0 ( 4.0)          | 0.01 |
| Chronic obstructive pulmonary disease (%) | 67.1 ( 9.8)          | 55.0 ( 8.9)          | 0.03 |
| Congestive heart failure (%)              | 33.4 ( 4.9)          | 31.0 ( 5.0)          | 0.00 |
| Coronary artery disease (%)               | 44.0 ( 6.5)          | 36.0 ( 5.8)          | 0.03 |
| Diabetes (%)                              | 55.5 ( 8.2)          | 47.0 ( 7.6)          | 0.02 |
| Hypertension (%)                          | 146.8 (21.5)         | 109.0 (17.6)         | 0.10 |
| Liver disease (%)                         | 14.1 ( 2.1)          | 15.0 ( 2.4)          | 0.02 |
| Malignancy (%)                            | 32.1 ( 4.7)          | 26.0 ( 4.2)          | 0.03 |
| Renal disease (%)                         | 6.1 ( 0.9)           | 5.0 ( 0.8)           | 0.01 |
| Recent use of an oral glucocorticoid (%)  | 120.7 (17.7)         | 108.0 (17.4)         | 0.01 |
| ICS dose (%)                              |                      |                      | 0.07 |
| None                                      | 240.6 (35.3)         | 239.0 (38.5)         |      |
| Low                                       | 152.0 (22.3)         | 133.0 (21.4)         |      |
| Medium                                    | 217.4 (31.9)         | 186.0 (30.0)         |      |
| High                                      | 71.1 (10.4)          | 63.0 (10.1)          |      |

N/R: nirmatrelvir-ritonavir. SMD: standardized mean difference.

**Supplement Table 5B. Patient characteristics after weighting with standardized mean differences between the molnupiravir group and the control group**

|                                           | Control              | Molnupiravir         | SMD  |
|-------------------------------------------|----------------------|----------------------|------|
| N                                         | 390.4                | 378.0                |      |
| Age (median [IQR])                        | 82.00 [66.00, 90.00] | 77.00 [67.00, 86.00] | 0.11 |
| Sex                                       |                      |                      |      |
| Female (%)                                | 247.4 (63.4)         | 227.0 (60.1)         | 0.07 |
| Male (%)                                  | 143.0 (36.6)         | 151.0 (39.9)         | 0.07 |
| Vaccination status (%)                    |                      |                      | 0.02 |
| Unvaccinated                              | 69.9 (17.9)          | 71.0 (18.8)          |      |
| 1-2 doses                                 | 85.6 (21.9)          | 82.0 (21.7)          |      |
| 3 or more doses                           | 234.9 (60.2)         | 225.0 (59.5)         |      |
| Hospital admission (%)                    | 164.9 (42.2)         | 156.0 (41.3)         | 0.02 |
| Concomitant pharmacological treatments    |                      |                      |      |
| Dexamethasone (%)                         | 12.1 ( 3.1)          | 11.0 ( 2.9)          | 0.01 |
| Prednisolone (%)                          | 25.8 ( 6.6)          | 28.0 ( 7.4)          | 0.03 |
| Remdesivir (%)                            | 5.1 ( 1.3)           | 5.0 ( 1.3)           | 0.00 |
| Comorbidity                               |                      |                      |      |
| Arrhythmia (%)                            | 65.2 (16.7)          | 75.0 (19.8)          | 0.08 |
| Cerebrovascular disease (%)               | 58.2 (14.9)          | 46.0 (12.2)          | 0.08 |
| Chronic obstructive pulmonary disease (%) | 47.2 (12.1)          | 40.0 (10.6)          | 0.05 |
| Congestive heart failure (%)              | 63.2 (16.2)          | 58.0 (15.3)          | 0.02 |
| Coronary artery disease (%)               | 44.0 (11.3)          | 46.0 (12.2)          | 0.03 |
| Diabetes (%)                              | 69.5 (17.8)          | 57.0 (15.1)          | 0.07 |
| Hypertension (%)                          | 138.1 (35.4)         | 114.0 (30.2)         | 0.11 |
| Liver disease (%)                         | 29.6 ( 7.6)          | 23.0 ( 6.1)          | 0.06 |
| Malignancy (%)                            | 33.2 ( 8.5)          | 33.0 ( 8.7)          | 0.01 |
| Renal disease (%)                         | 34.7 ( 8.9)          | 22.0 ( 5.8)          | 0.12 |
| Recent use of an oral glucocorticoid (%)  | 129.4 (33.1)         | 106.0 (28.0)         | 0.11 |
| ICS dose (%)                              |                      |                      | 0.08 |
| None                                      | 101.7 (26.0)         | 109.0 (28.8)         |      |
| Low                                       | 71.8 (18.4)          | 71.0 (18.8)          |      |
| Medium                                    | 145.3 (37.2)         | 127.0 (33.6)         |      |
| High                                      | 71.6 (18.4)          | 71.0 (18.8)          |      |

SMD: standardized mean difference.

**Supplement Table 5C. Patient characteristics after weighting with standardized mean differences between the nirmatrelvir-ritonavir group and the molnupiravir group**

|                                           | Molnupiravir         | N/R                  | SMD  |
|-------------------------------------------|----------------------|----------------------|------|
| N                                         | 620.6                | 621.0                |      |
| Age (median [IQR])                        | 70.00 [56.56, 80.00] | 70.00 [54.25, 80.00] | 0.01 |
| Sex                                       |                      |                      |      |
| Female (%)                                | 388.7 (62.6)         | 384.0 (61.8)         | 0.02 |
| Male (%)                                  | 231.9 (37.4)         | 237.0 (38.2)         | 0.02 |
| Vaccination status (%)                    |                      |                      | 0.07 |
| Unvaccinated                              | 70.5 (11.4)          | 73.0 (11.8)          |      |
| 1-2 doses                                 | 135.5 (21.8)         | 118.0 (19.0)         |      |
| 3 or more doses                           | 414.6 (66.8)         | 430.0 (69.2)         |      |
| Hospital admission (%)                    | 260.6 (42.0)         | 241.0 (38.8)         | 0.07 |
| Concomitant pharmacological treatments    |                      |                      |      |
| Dexamethasone (%)                         | 24.9 ( 4.0)          | 28.0 ( 4.5)          | 0.02 |
| Prednisolone (%)                          | 31.9 ( 5.1)          | 36.0 ( 5.8)          | 0.03 |
| Remdesivir (%)                            | 10.3 ( 1.7)          | 12.0 ( 1.9)          | 0.02 |
| Comorbidity                               |                      |                      |      |
| Arrhythmia (%)                            | 28.0 ( 4.5)          | 29.0 ( 4.7)          | 0.01 |
| Cerebrovascular disease (%)               | 35.3 ( 5.7)          | 25.0 ( 4.0)          | 0.08 |
| Chronic obstructive pulmonary disease (%) | 51.3 ( 8.3)          | 55.0 ( 8.9)          | 0.02 |
| Congestive heart failure (%)              | 29.0 ( 4.7)          | 31.0 ( 5.0)          | 0.02 |
| Coronary artery disease (%)               | 31.8 ( 5.1)          | 36.0 ( 5.8)          | 0.03 |
| Diabetes (%)                              | 58.1 ( 9.4)          | 47.0 ( 7.6)          | 0.06 |
| Hypertension (%)                          | 122.7 (19.8)         | 109.0 (17.6)         | 0.06 |
| Liver disease (%)                         | 18.2 ( 2.9)          | 15.0 ( 2.4)          | 0.03 |
| Malignancy (%)                            | 28.8 ( 4.6)          | 26.0 ( 4.2)          | 0.02 |
| Renal disease (%)                         | 5.2 ( 0.8)           | 5.0 ( 0.8)           | 0.00 |
| Recent use of an oral glucocorticoid (%)  | 113.4 (18.3)         | 108.0 (17.4)         | 0.02 |
| ICS dose (%)                              |                      |                      | 0.04 |
| None                                      | 248.9 (40.1)         | 239.0 (38.5)         |      |
| Low                                       | 124.1 (20.0)         | 133.0 (21.4)         |      |
| Medium                                    | 187.9 (30.3)         | 186.0 (30.0)         |      |
| High                                      | 59.6 ( 9.6)          | 63.0 (10.1)          |      |

N/R: nirmatrelvir-ritonavir. SMD: standardized mean difference.



**Supplement Table 6. Proportions of patients with moderate to severe COVID-19 at baseline based on prescription of concomitant pharmacological treatments**

| Outcome                                           | N/R           | Molnupiravir  | Control        |
|---------------------------------------------------|---------------|---------------|----------------|
| Death (day 0-30)                                  | 62/621 (10.0) | 40/378 (10.6) | 218/746 (29.2) |
| Death (day 31-365)                                | 62/621 (10.0) | 40/378 (10.6) | 218/746 (29.2) |
| ICU admission or respiratory support (day 0-30)   | 62/621 (10.0) | 40/378 (10.6) | 218/746 (29.2) |
| ICU admission or respiratory support (day 31-365) | 62/621 (10.0) | 40/378 (10.6) | 218/746 (29.2) |
| All-cause hospitalization                         | 62/621 (10.0) | 40/378 (10.6) | 218/746 (29.2) |
| Chronic pulmonary disease excluding asthma        | 40/536 (7.5)  | 29/315 (9.2)  | 147/600 (24.5) |
| Acute respiratory distress syndrome               | 55/594 (9.3)  | 34/355 (9.6)  | 188/684 (27.5) |
| Myocardial infarction                             | 62/615 (10.1) | 37/363 (10.2) | 207/723 (28.6) |
| Stroke                                            | 59/601 (9.8)  | 39/351 (11.1) | 208/712 (29.2) |
| Asthma exacerbation                               | 62/621 (10.0) | 40/378 (10.6) | 218/746 (29.2) |

Patients were categorized into mild cases or moderate to severe cases based on prescription of concomitant pharmacological treatments. Patients who were not prescribed concomitant pharmacological treatments (i.e., dexamethasone, prednisolone, and remdesivir) were categorized as mild cases, while patients who were prescribed any of the concomitant treatments were categorized as moderate to severe cases. N/R: nirmatrelvir-ritonavir.

**Supplement Table 7. Sensitivity analysis 1: Patient characteristics in the comparison between the molnupiravir group and control group with the start of the study period as the date when molnupiravir became available (Feb. 26, 2022) and without excluding individuals with contraindications to nirmatrelvir/ritonavir**

| Characteristic                            | Molnupiravir Group   | Control Group        |
|-------------------------------------------|----------------------|----------------------|
| n                                         | 460                  | 1146                 |
| Age (median [IQR])                        | 78.00 [68.75, 87.00] | 74.00 [55.00, 86.00] |
| Sex                                       |                      |                      |
| Female (%)                                | 272 (59.1)           | 649 (56.6)           |
| Male (%)                                  | 188 (40.9)           | 497 (43.4)           |
| Vaccination status (%)                    |                      |                      |
| Unvaccinated                              | 104 (22.6)           | 369 (32.2)           |
| 1-2 doses                                 | 101 (22.0)           | 385 (33.6)           |
| ≥3 doses                                  | 255 (55.4)           | 392 (34.2)           |
| Hospital admission (%)                    | 198 (43.0)           | 489 (42.7)           |
| Concomitant pharmacological treatments    |                      |                      |
| Dexamethasone (%)                         | 26 (5.7)             | 220 (19.2)           |
| Prednisolone (%)                          | 34 (7.4)             | 71 (6.2)             |
| Remdesivir (%)                            | 8 (1.7)              | 156 (13.6)           |
| Comorbidity                               |                      |                      |
| Arrhythmia (%)                            | 94 (20.4)            | 143 (12.5)           |
| Cerebrovascular disease (%)               | 59 (12.8)            | 98 (8.6)             |
| Chronic obstructive pulmonary disease (%) | 54 (11.7)            | 184 (16.1)           |
| Congestive heart failure (%)              | 78 (17.0)            | 186 (16.2)           |
| Coronary artery disease (%)               | 59 (12.8)            | 130 (11.3)           |
| Diabetes (%)                              | 72 (15.7)            | 171 (14.9)           |
| Hypertension (%)                          | 154 (33.5)           | 329 (28.7)           |
| Liver disease (%)                         | 30 (6.5)             | 62 (5.4)             |
| Malignancy (%)                            | 37 (8.0)             | 70 (6.1)             |
| Renal disease (%)                         | 32 (7.0)             | 44 (3.8)             |
| Recent use of an oral glucocorticoid (%)  | 131 (28.5)           | 384 (33.5)           |
| ICS dose (%)                              |                      |                      |
| None                                      | 122 (26.5)           | 358 (31.2)           |
| Low                                       | 95 (20.7)            | 226 (19.7)           |
| Medium                                    | 166 (36.1)           | 408 (35.6)           |
| High                                      | 77 (16.7)            | 154 (13.4)           |

## Supplement Figures

**Supplement Figure 1A. Standardized mean difference for each covariate in the comparison between the nirmatrelvir/ritonavir group and control group for the outcome of death (day 0–30) before and after weighting**

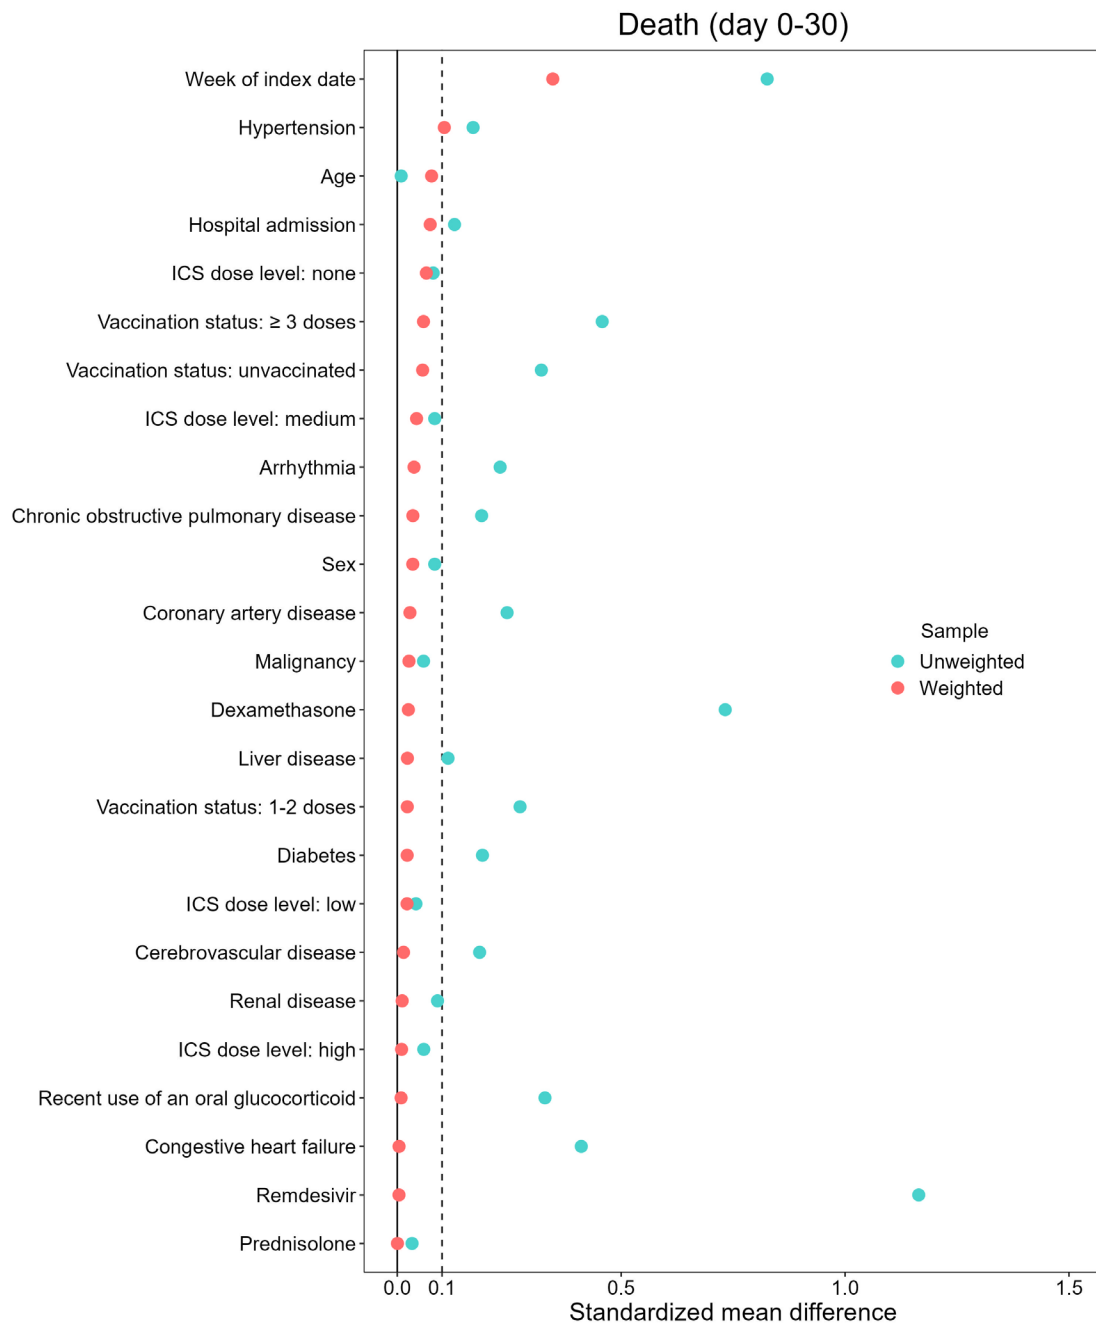

**Supplement Figure 1B. Standardized mean difference for each covariate in the comparison between the molnupiravir group and control group for the outcome of death (day 0–30) before and after weighting**

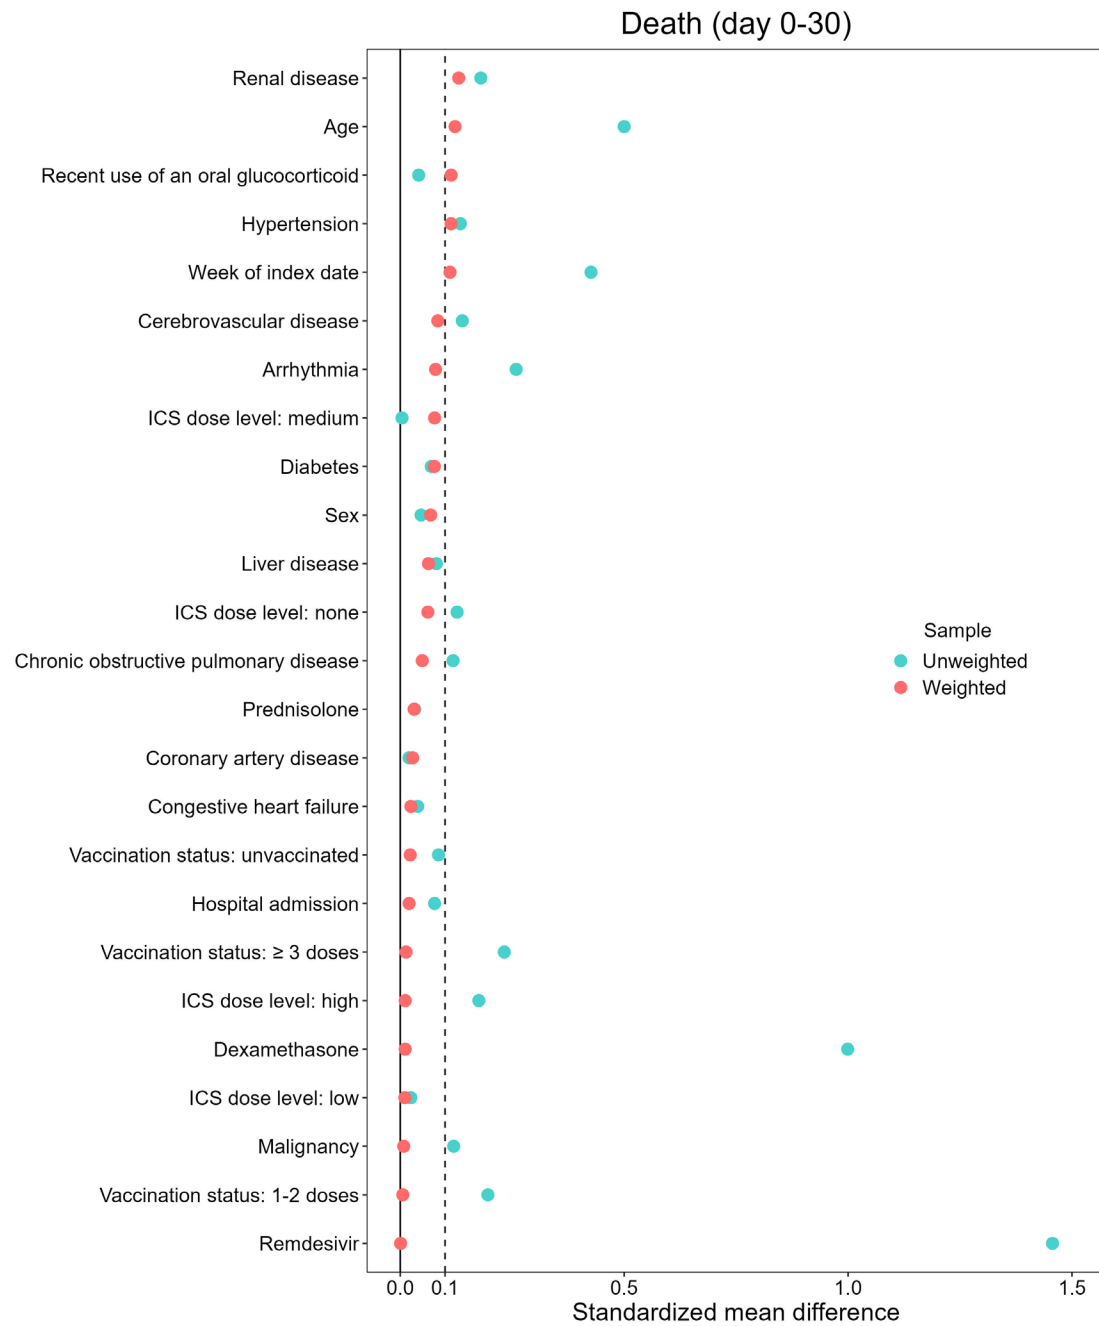

**Supplement Figure 1C. Standardized mean difference for each covariate in the comparison between the nirmatrelvir/ritonavir group and molnupiravir group for the outcome of death (day 0–30) before and after weighting**

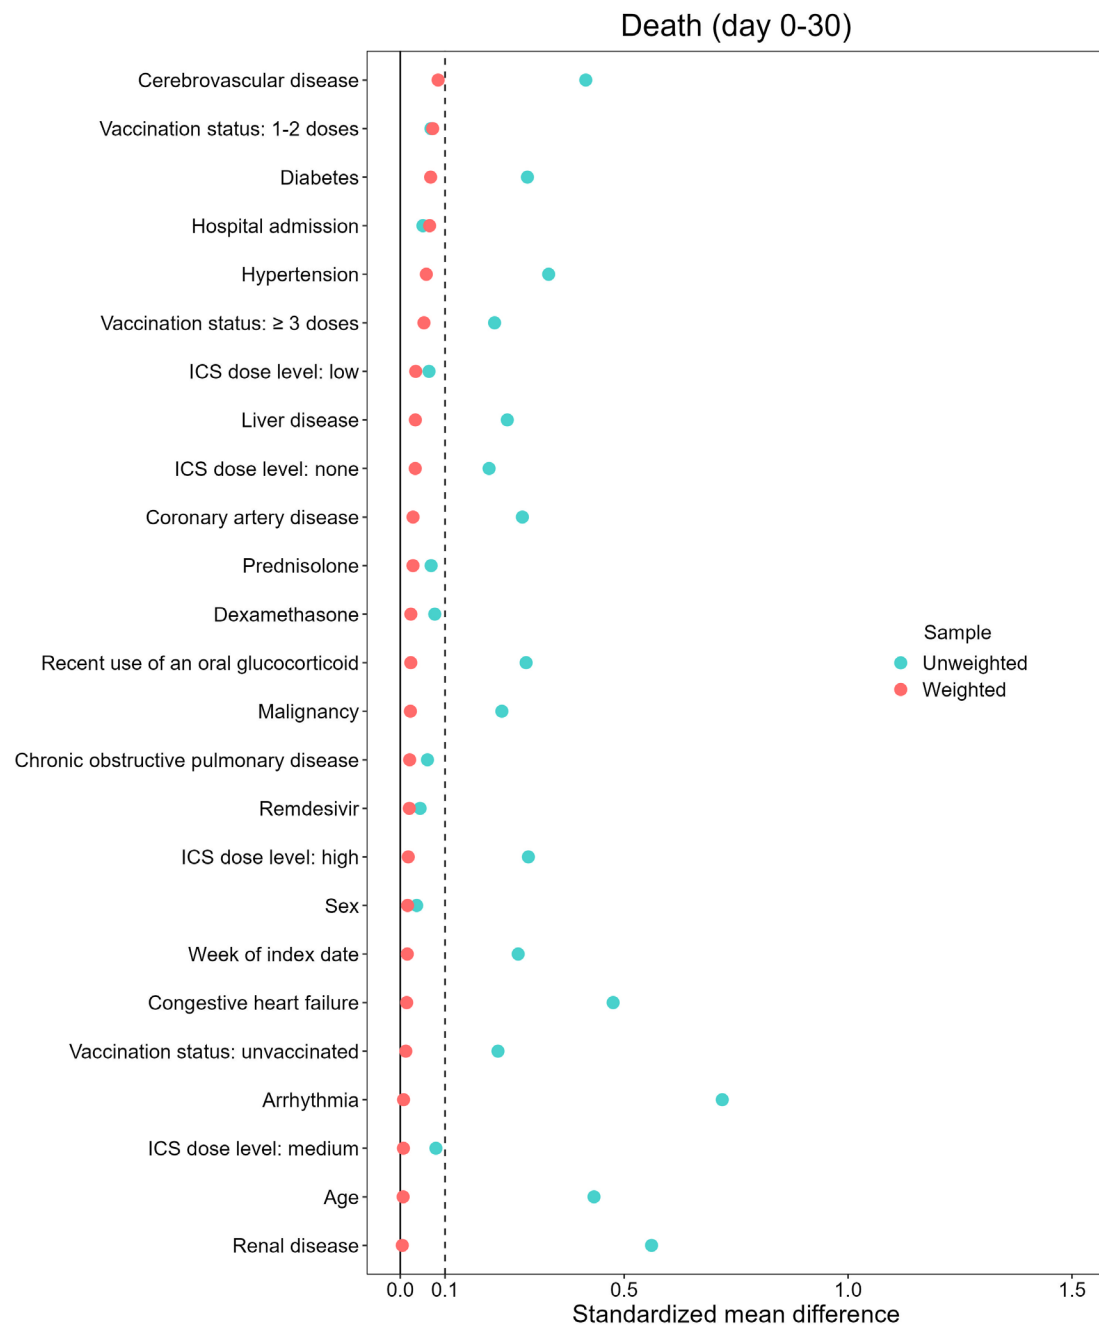

**Supplement Figure 2A. Standardized mean difference for each covariate in the comparison between the nirmatrelvir/ritonavir group and control group for the outcome of death (day 31–365) before and after weighting**

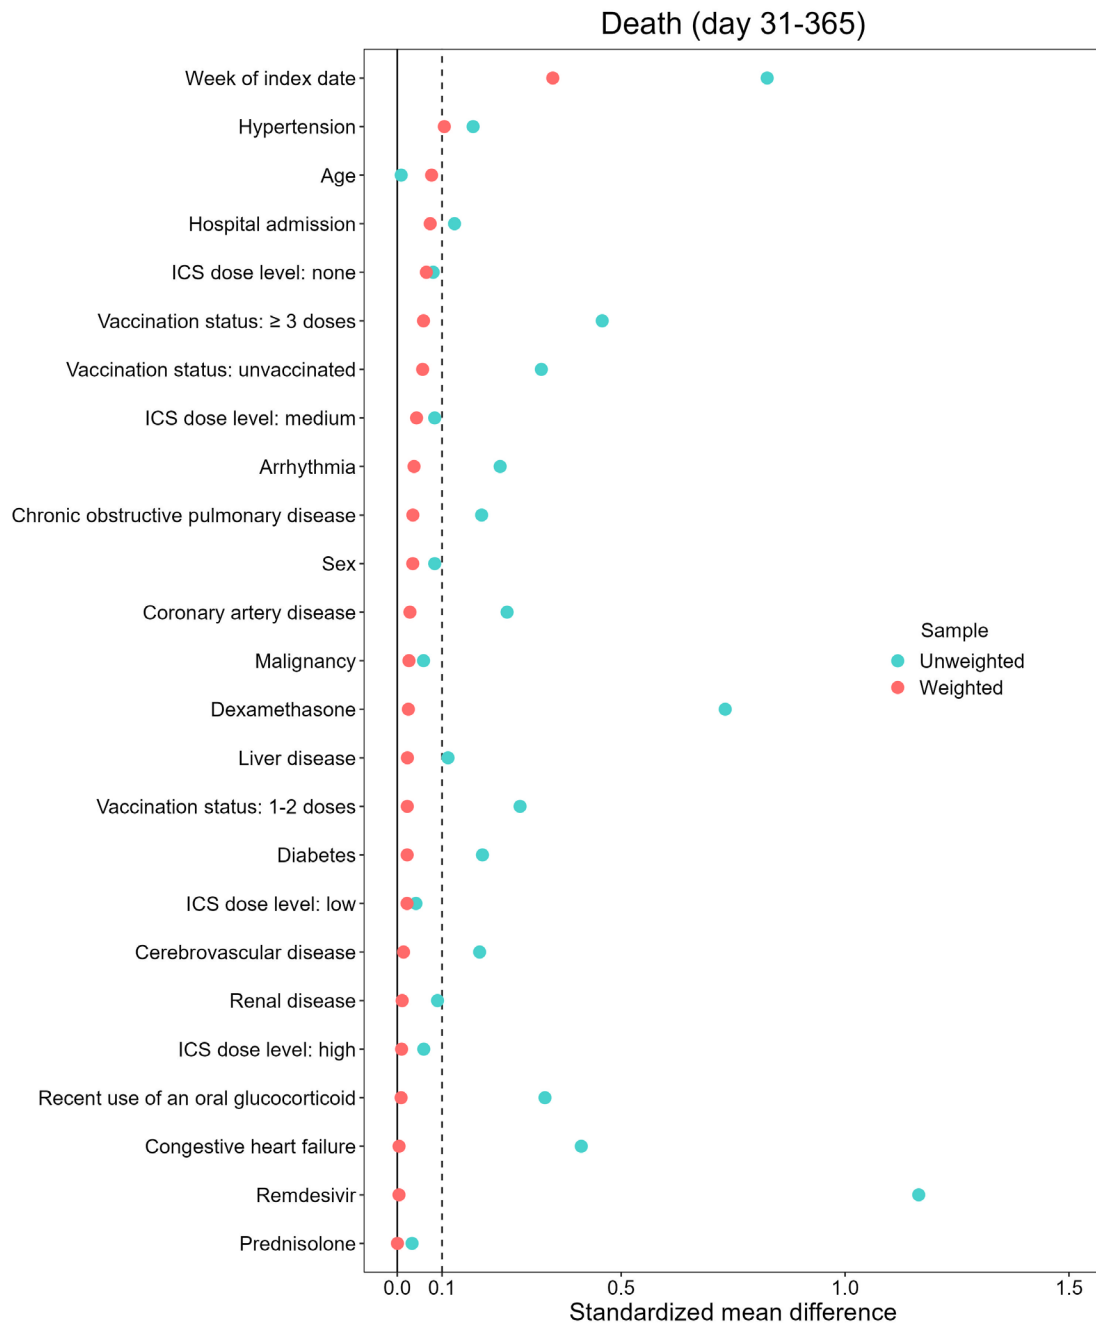

**Supplement Figure 2B. Standardized mean difference for each covariate in the comparison between the molnupiravir group and control group for the outcome of death (day 31–365) before and after weighting**

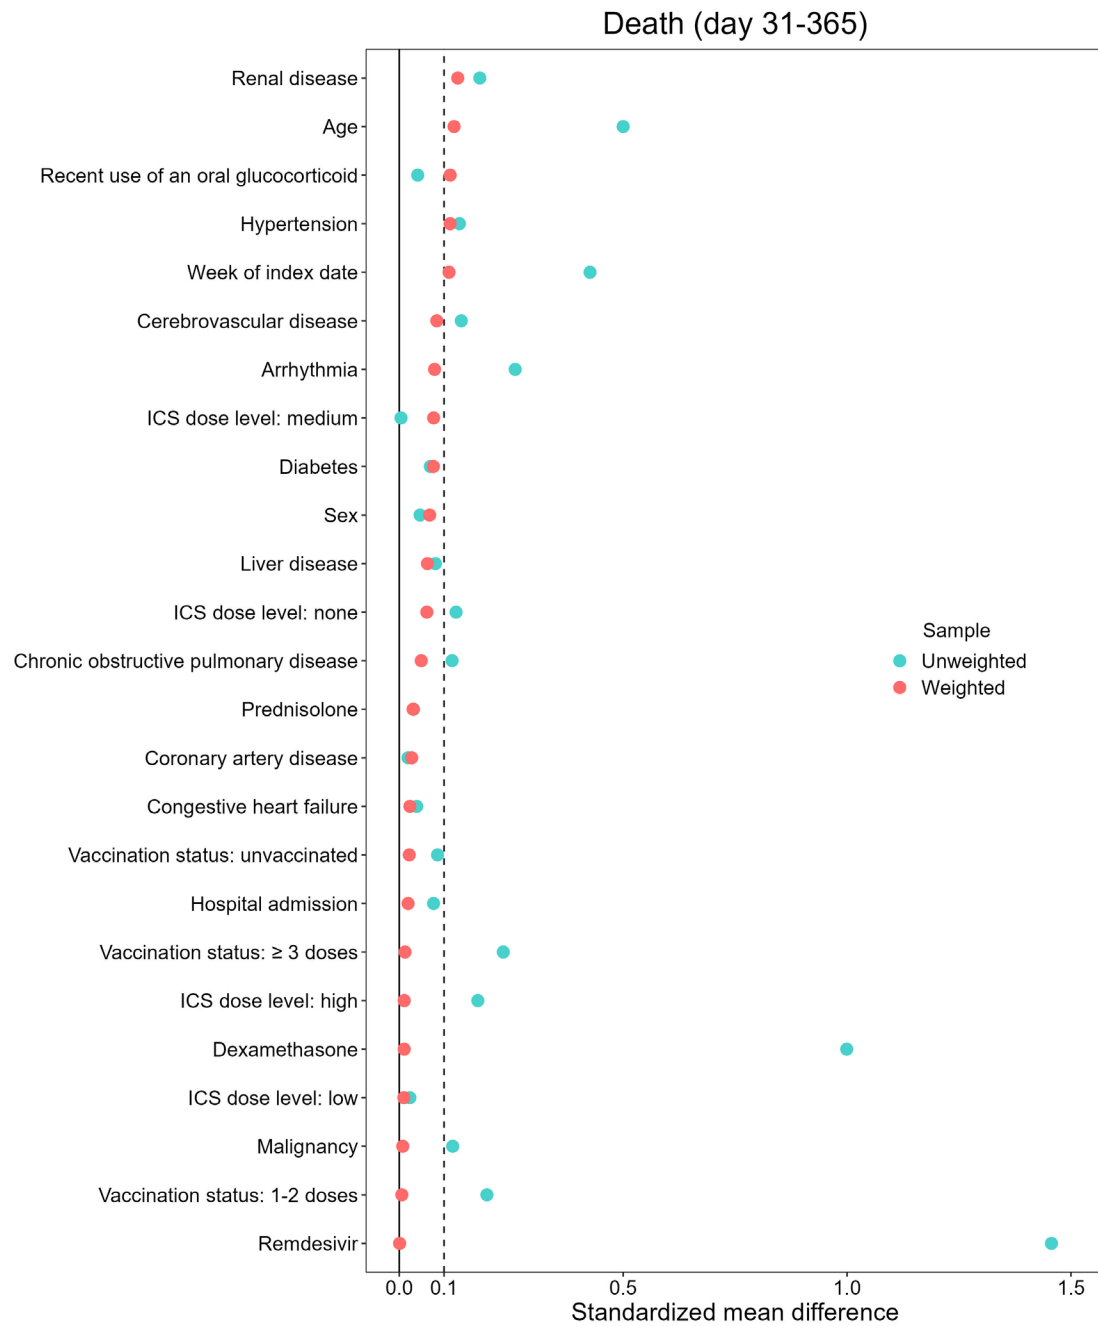

**Supplement Figure 2C. Standardized mean difference for each covariate in the comparison between the nirmatrelvir/ritonavir group and molnupiravir group for the outcome of death (day 31–365) before and after weighting**

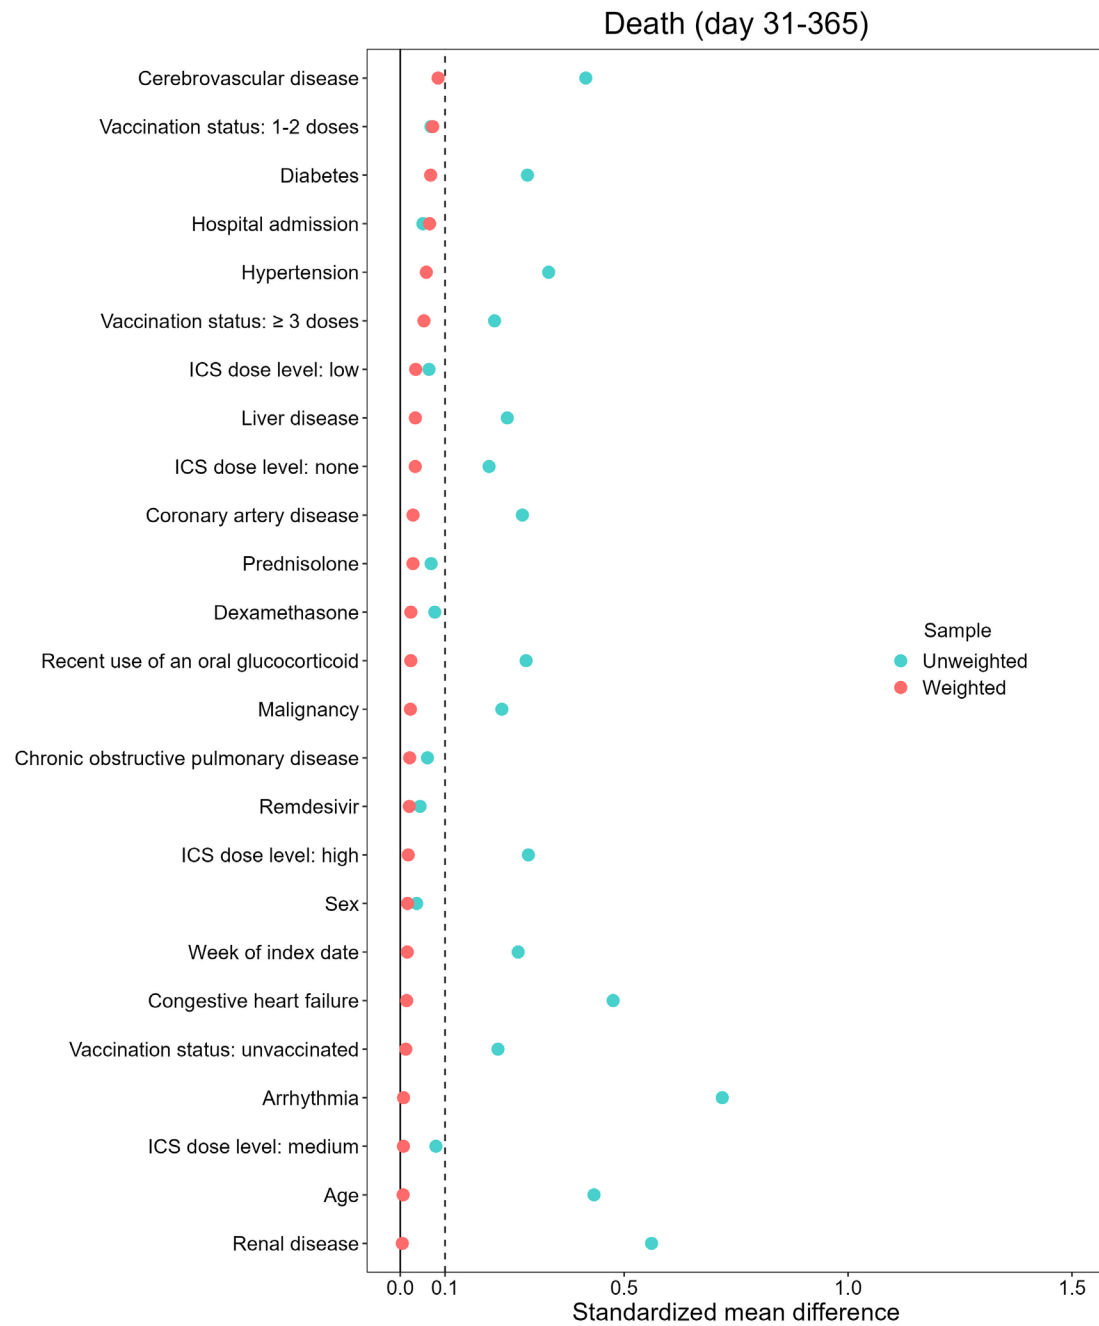



**Supplement Figure 3A. Standardized mean difference for each covariate in the comparison between the nirmatrelvir/ritonavir group and control group for the outcome of ICU admission or respiratory support (day 0–30) before and after weighting**

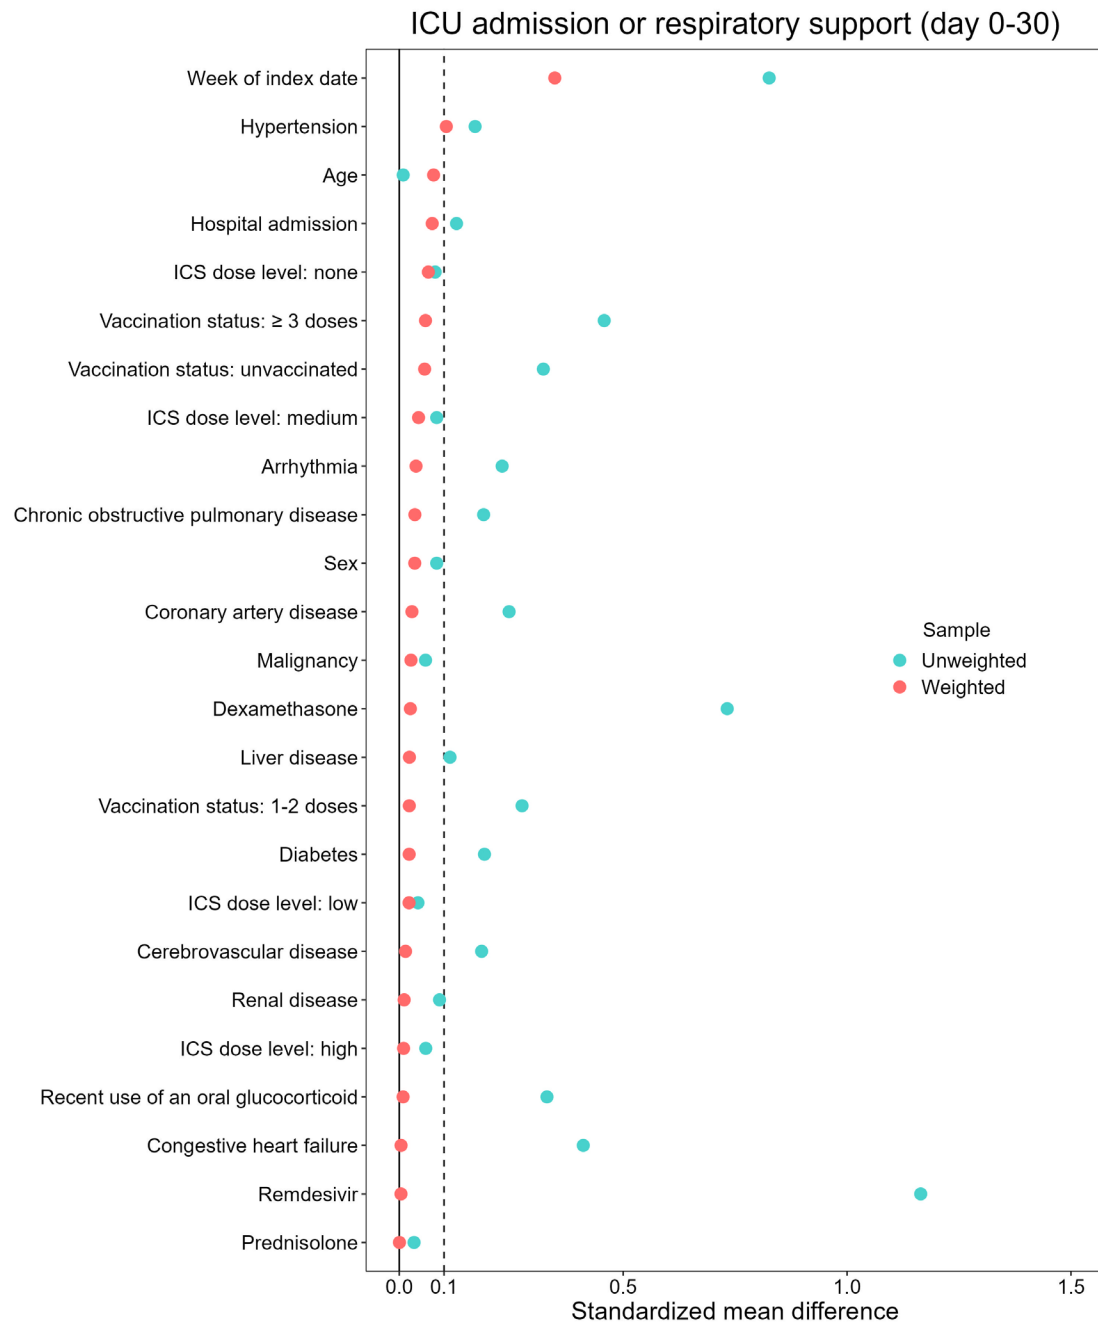

**Supplement Figure 3B. Standardized mean difference for each covariate in the comparison between the molnupiravir group and control group for the outcome of ICU admission or respiratory support (day 0–30) before and after weighting**

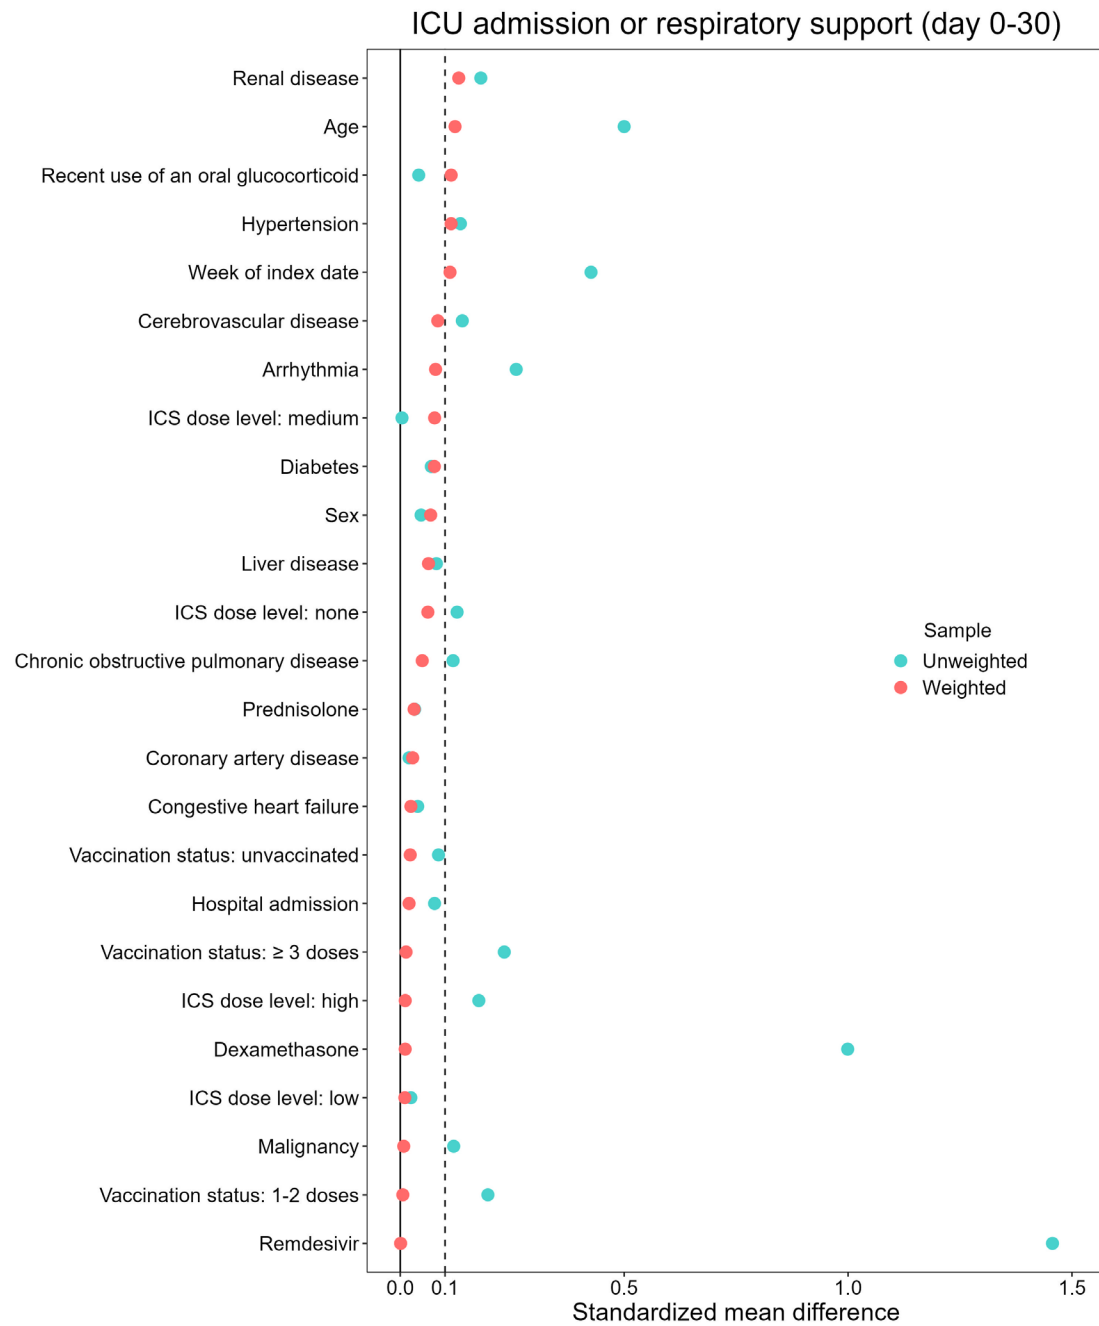

**Supplement Figure 3C. Standardized mean difference for each covariate in the comparison between the nirmatrelvir/ritonavir group and molnupiravir group for the outcome of ICU admission or respiratory support (day 0–30) before and after weighting**

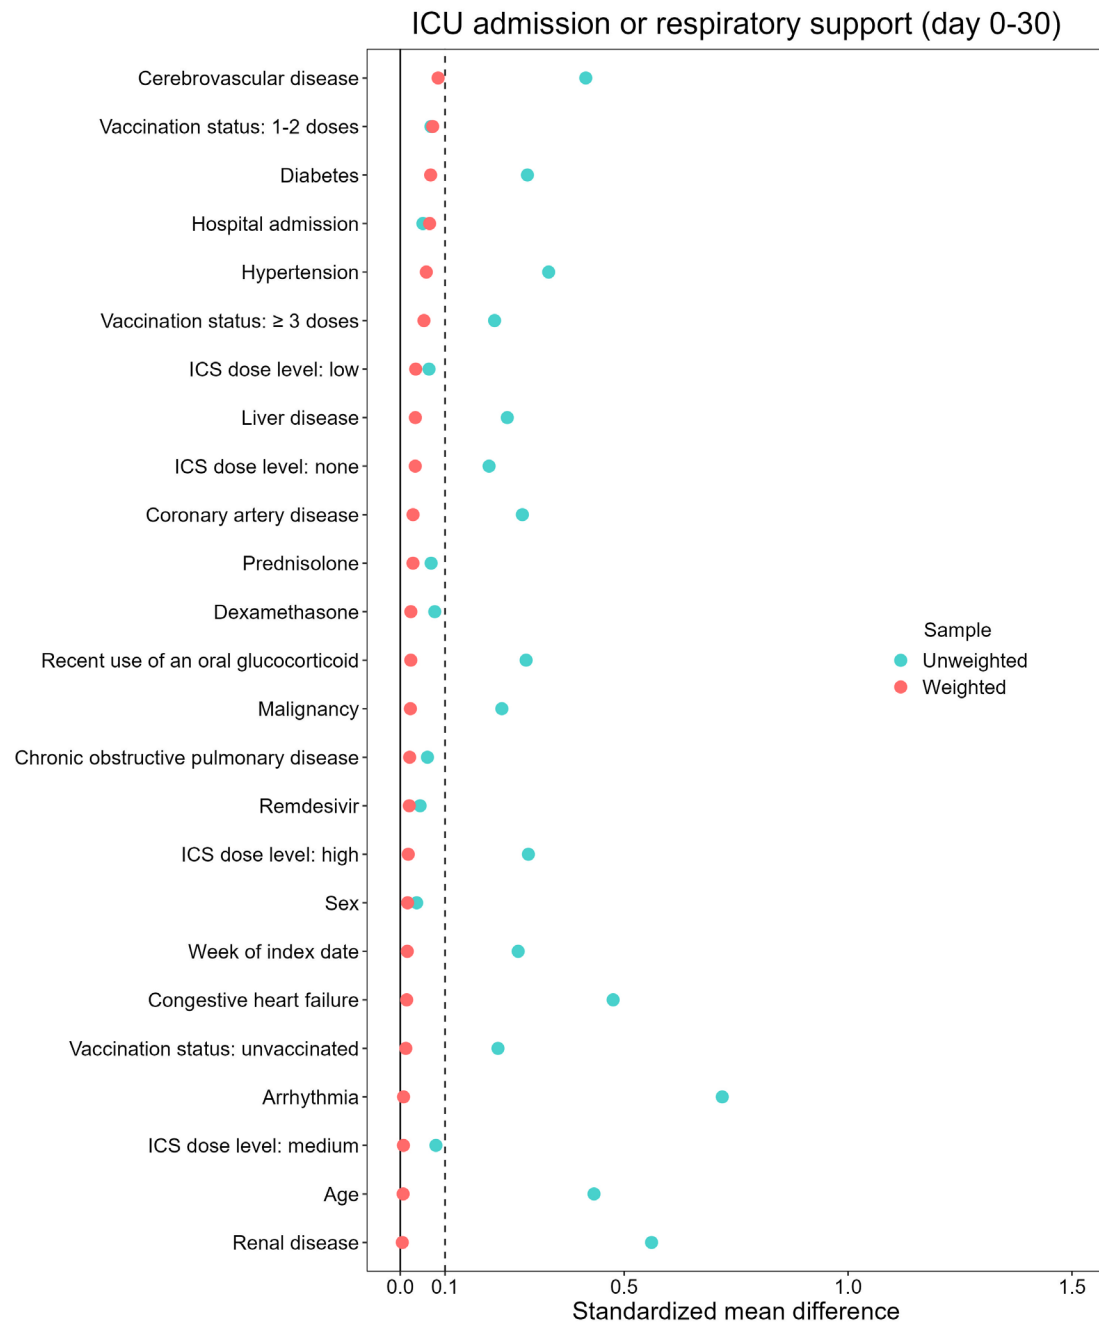

**Supplement Figure 4A. Standardized mean difference for each covariate in the comparison between the nirmatrelvir/ritonavir group and control group for the outcome of ICU admission or respiratory support (day 31–365) before and after weighting**

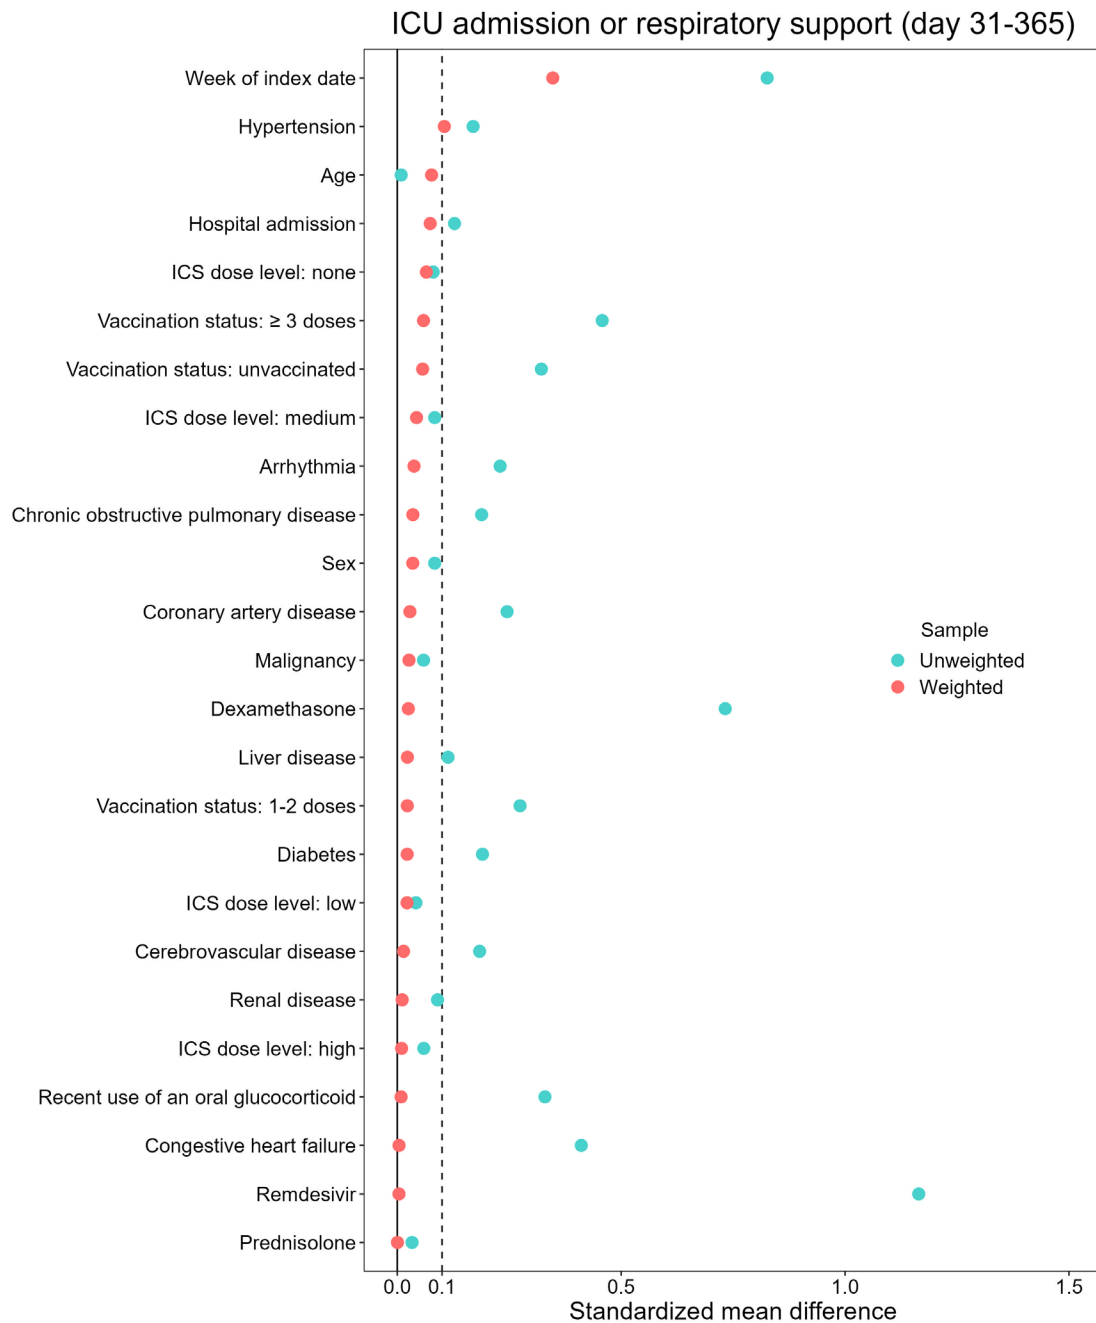

**Supplement Figure 4B. Standardized mean difference for each covariate in the comparison between the molnupiravir group and control group for the outcome of ICU admission or respiratory support (day 31–365) before and after weighting**

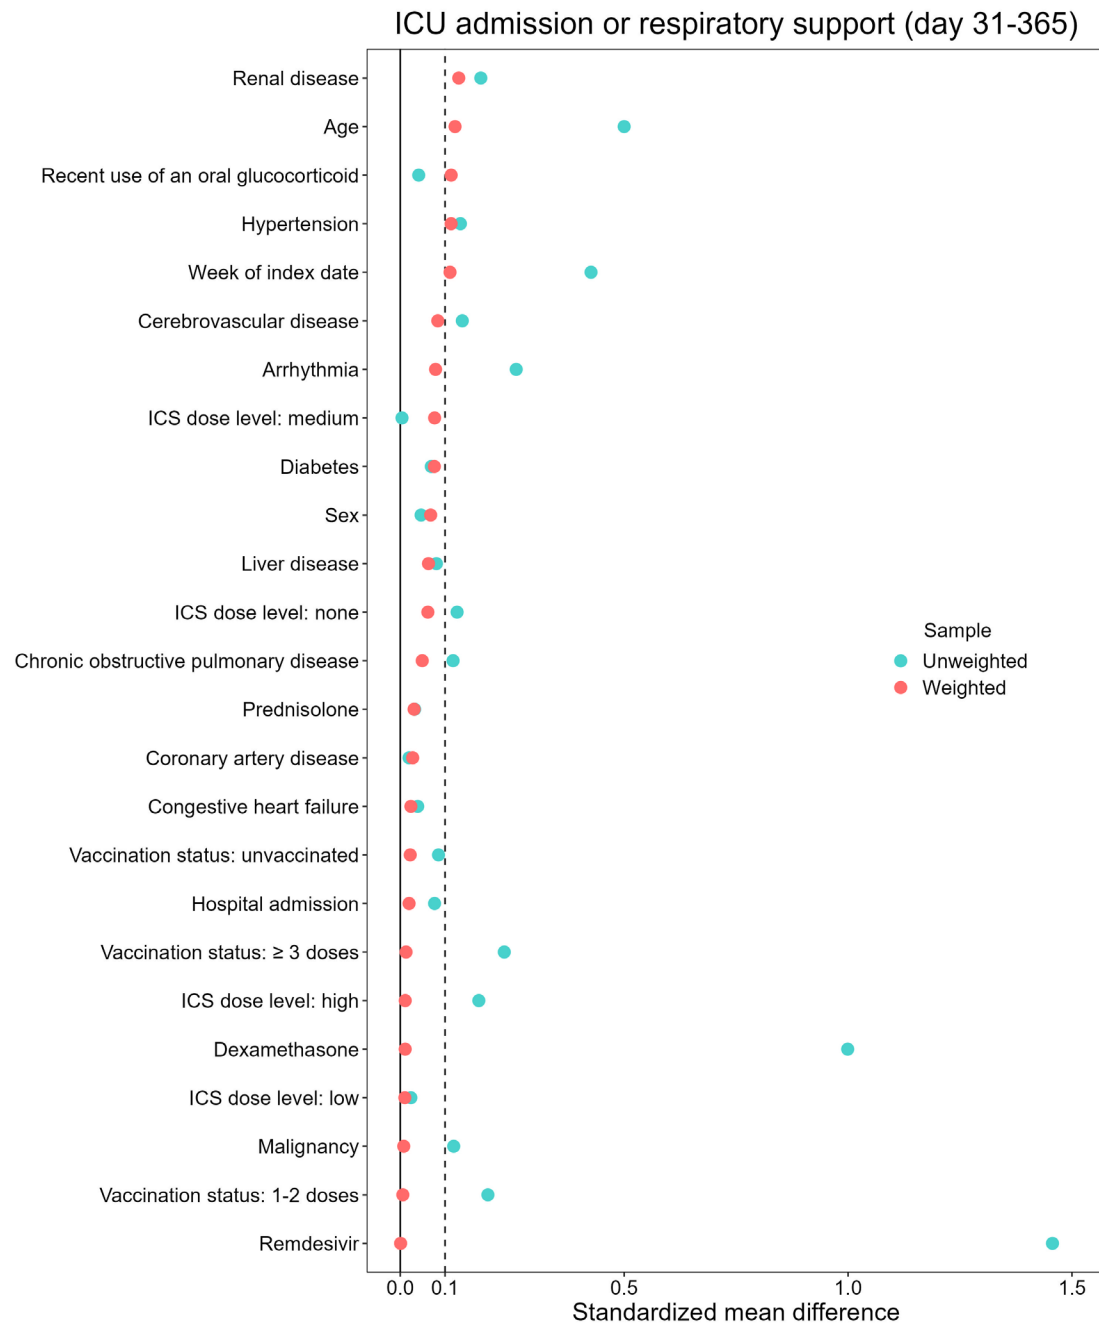

**Supplement Figure 4C. Standardized mean difference for each covariate in the comparison between the nirmatrelvir/ritonavir group and molnupiravir group for the outcome of ICU admission or respiratory support (day 31–365) before and after weighting**

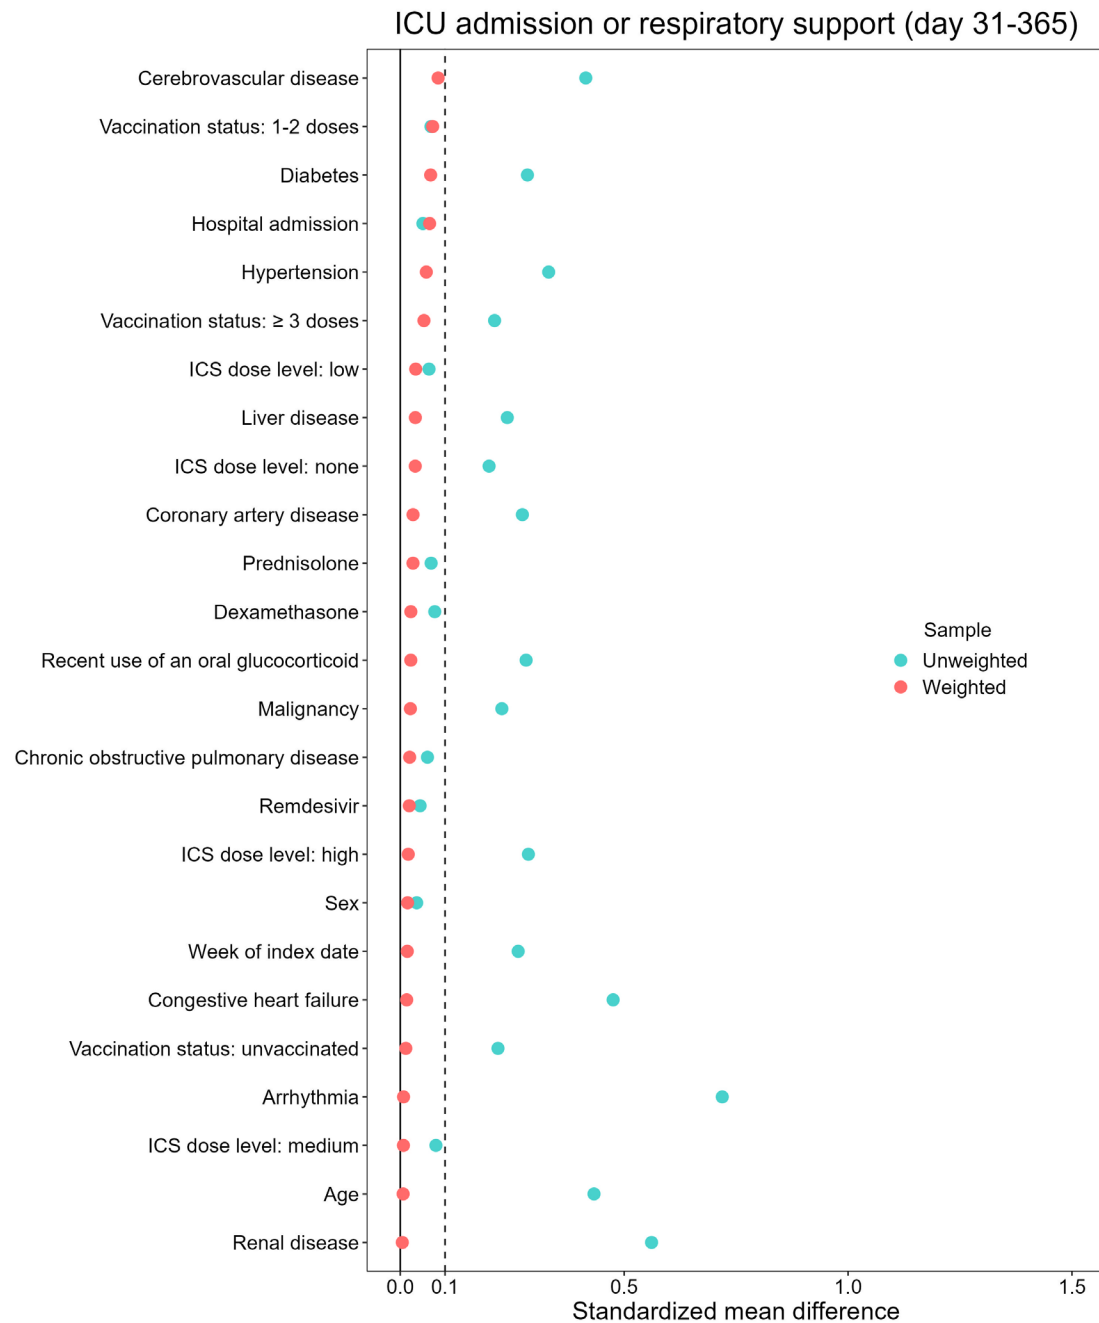

**Supplement Figure 5A. Standardized mean difference for each covariate in the comparison between the nirmatrelvir/ritonavir group and control group for the outcome of all-cause hospitalization before and after weighting**

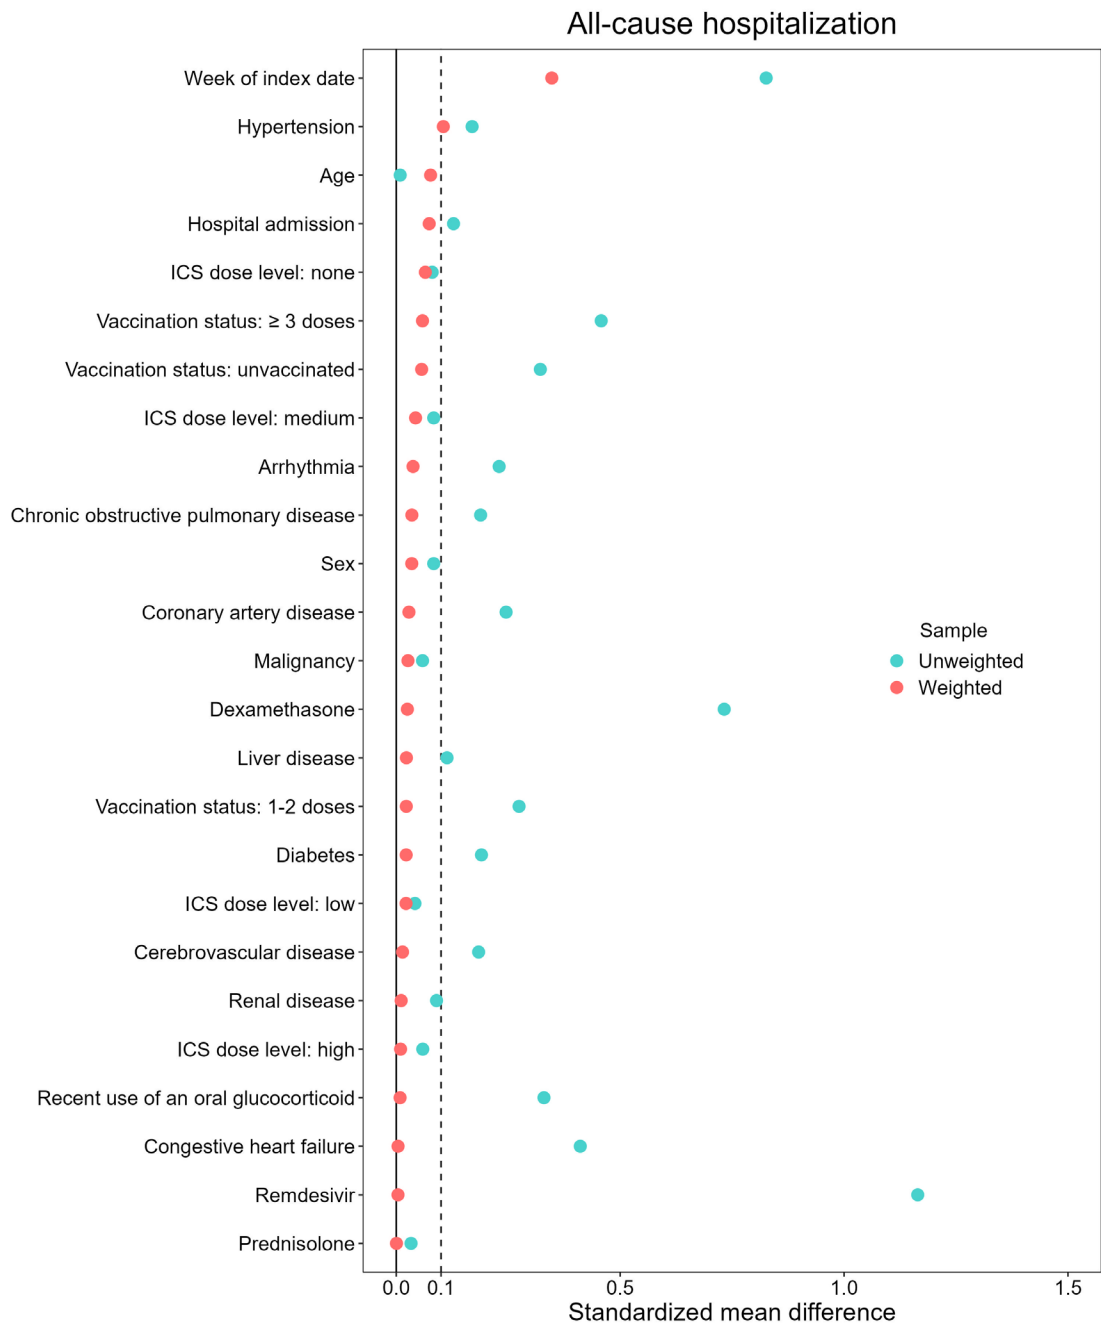

**Supplement Figure 5B. Standardized mean difference for each covariate in the comparison between the molnupiravir group and control group for the outcome of all-cause hospitalization before and after weighting**

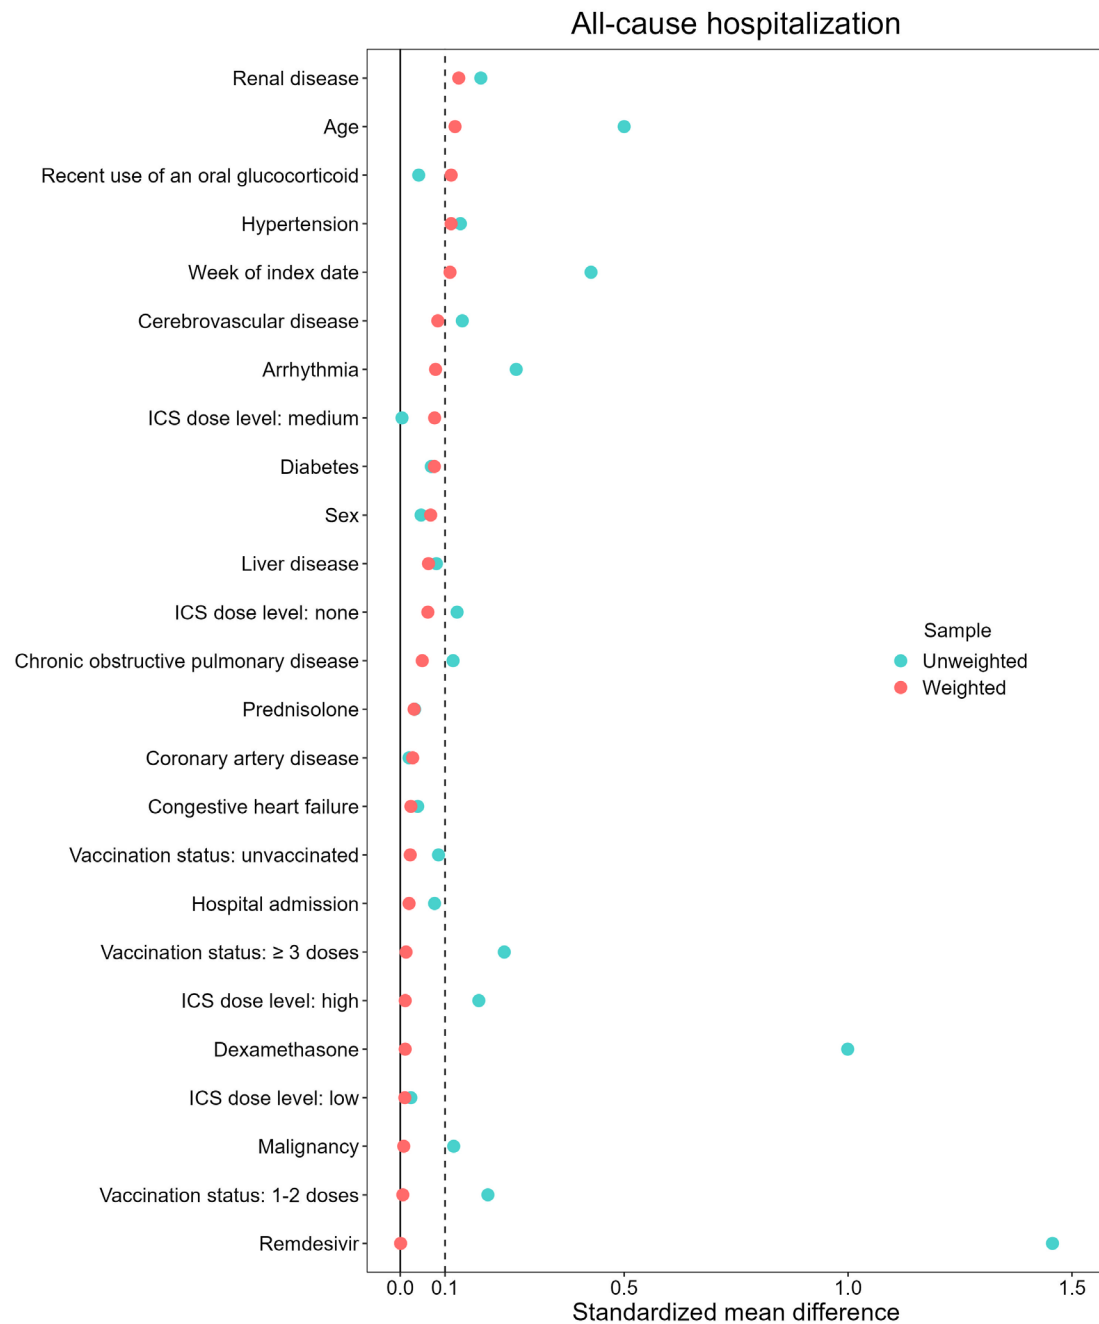



**Supplement Figure 5C. Standardized mean difference for each covariate in the comparison between the nirmatrelvir/ritonavir group and molnupiravir group for the outcome of all-cause hospitalization before and after weighting**

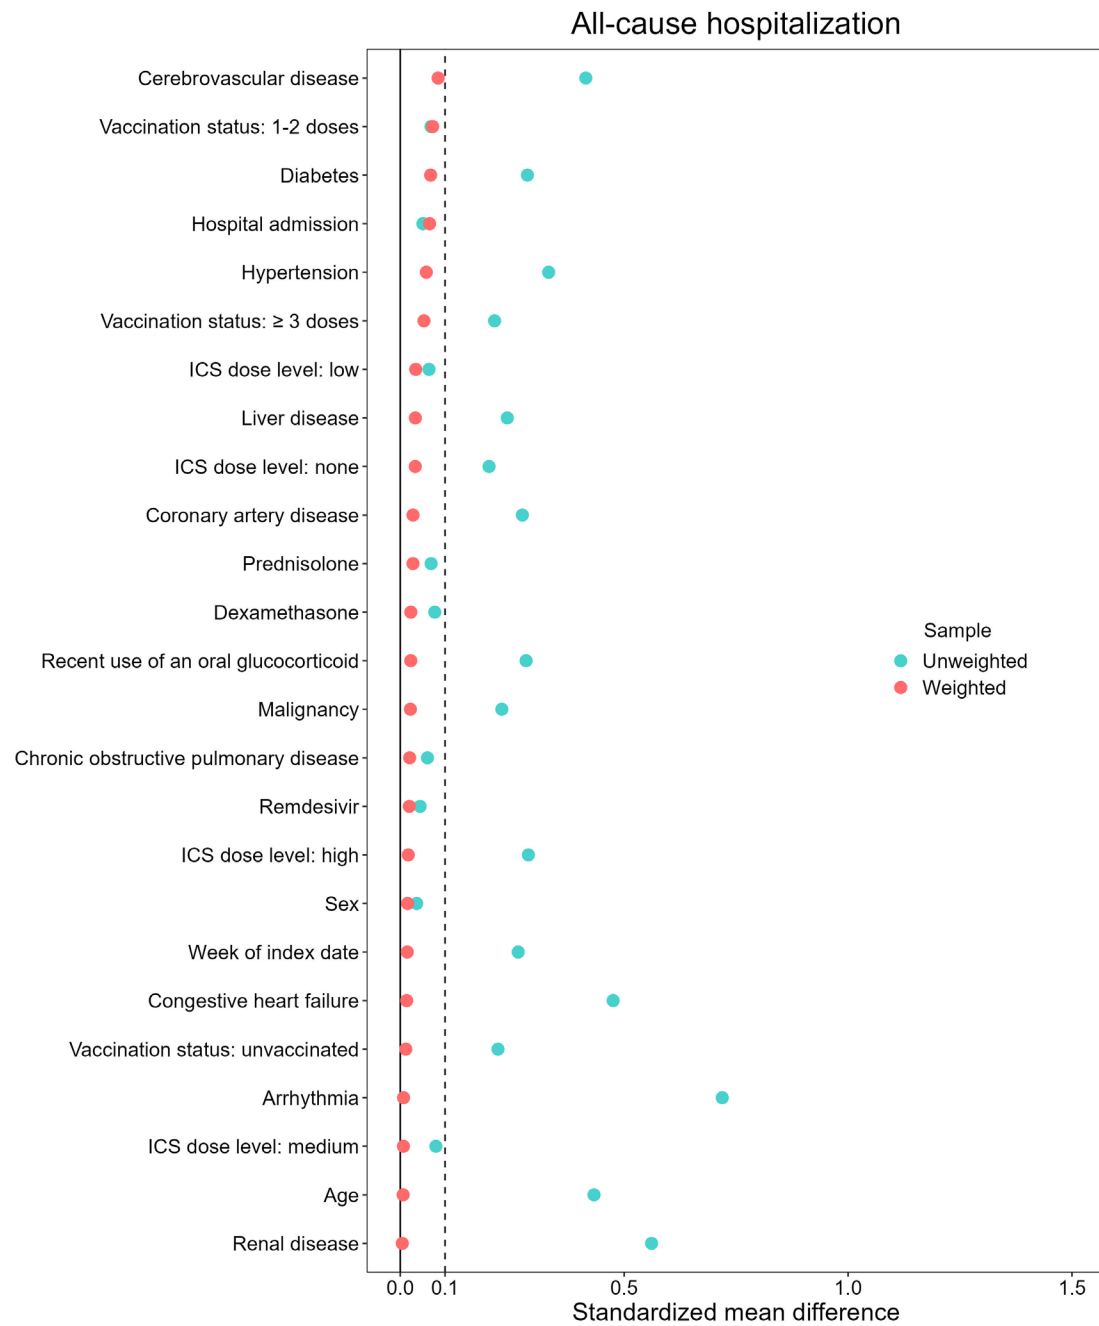

**Supplement Figure 6A. Standardized mean difference for each covariate in the comparison between the nirmatrelvir/ritonavir group and control group for the outcome of chronic pulmonary disease excluding asthma before and after weighting**

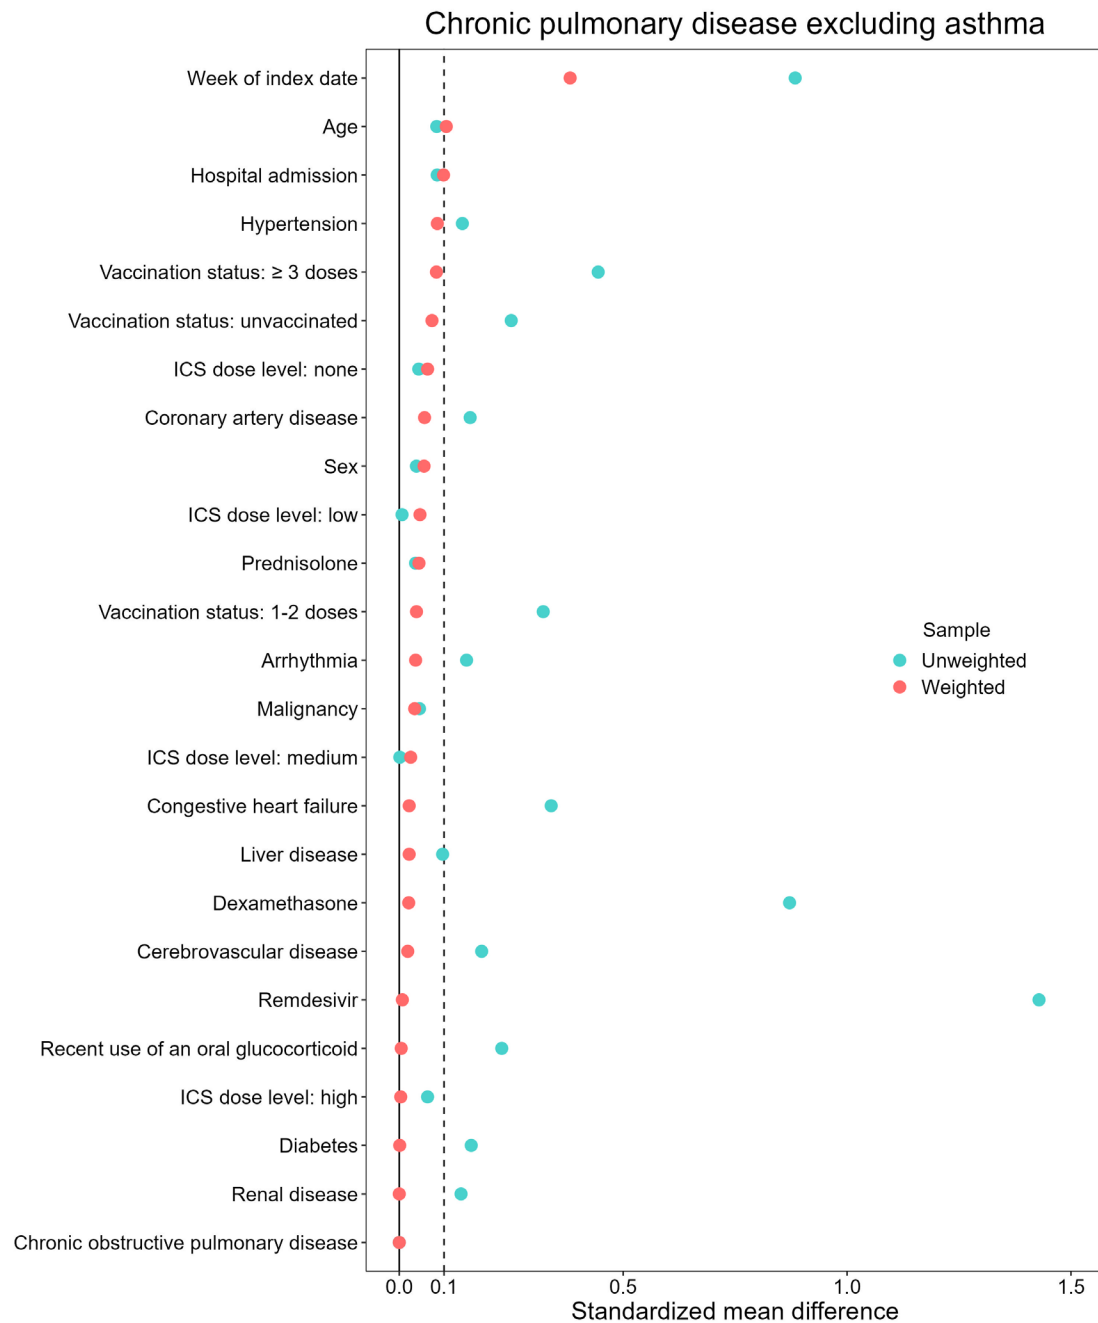

**Supplement Figure 6B. Standardized mean difference for each covariate in the comparison between the molnupiravir group and control group for the outcome of chronic pulmonary disease excluding asthma before and after weighting**

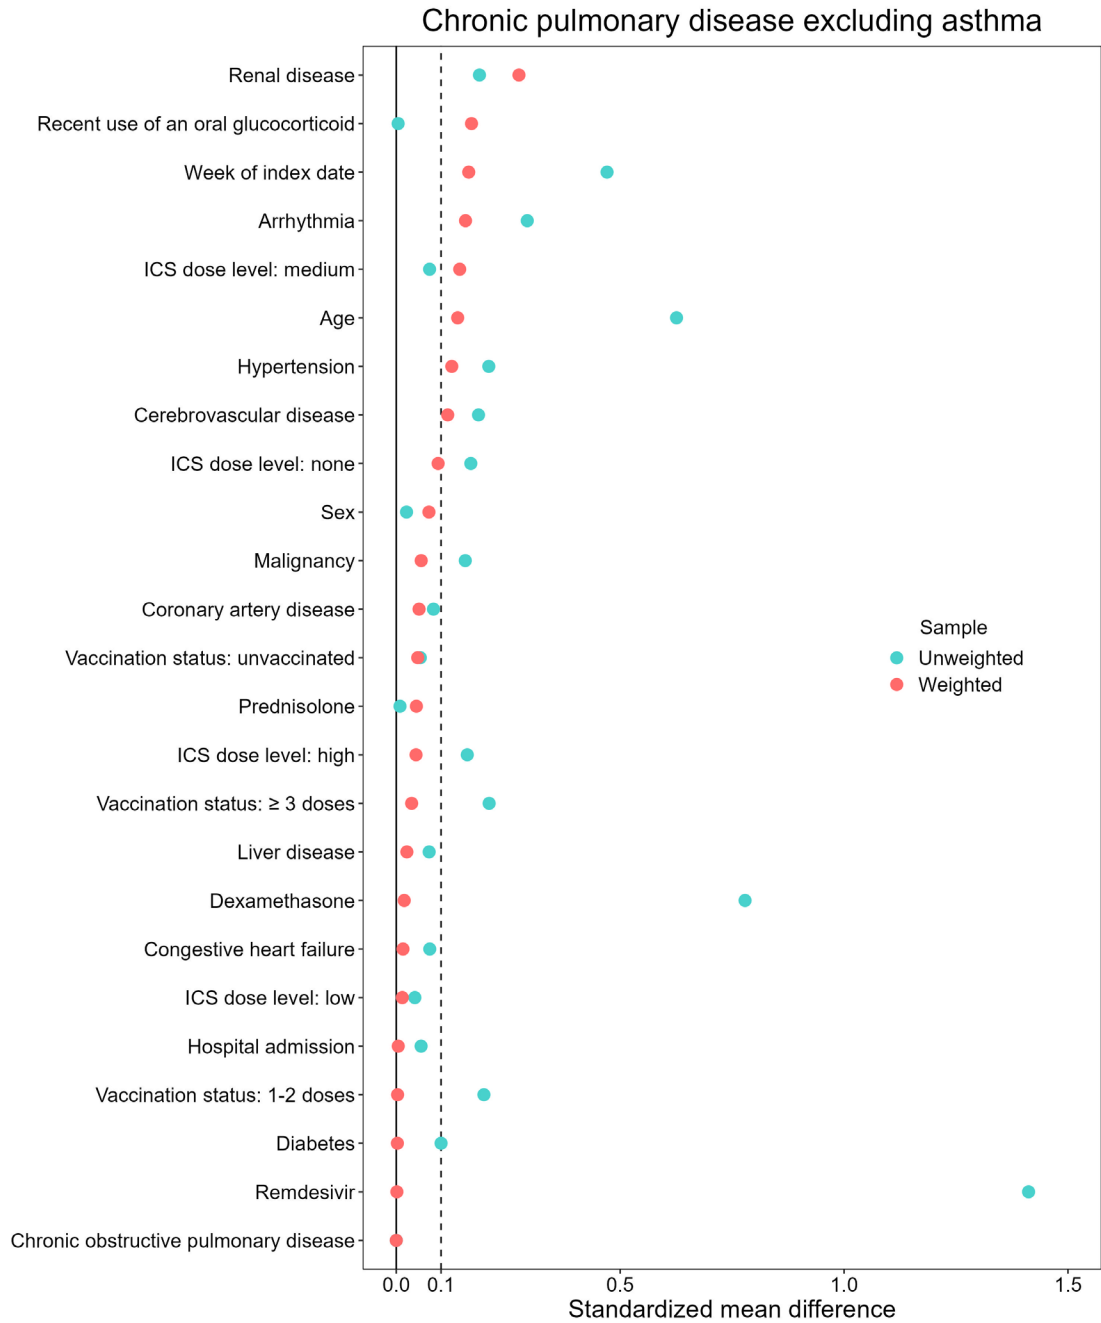

**Supplement Figure 6C. Standardized mean difference for each covariate in the comparison between the nirmatrelvir/ritonavir group and molnupiravir group for the outcome of chronic pulmonary disease excluding asthma before and after weighting**

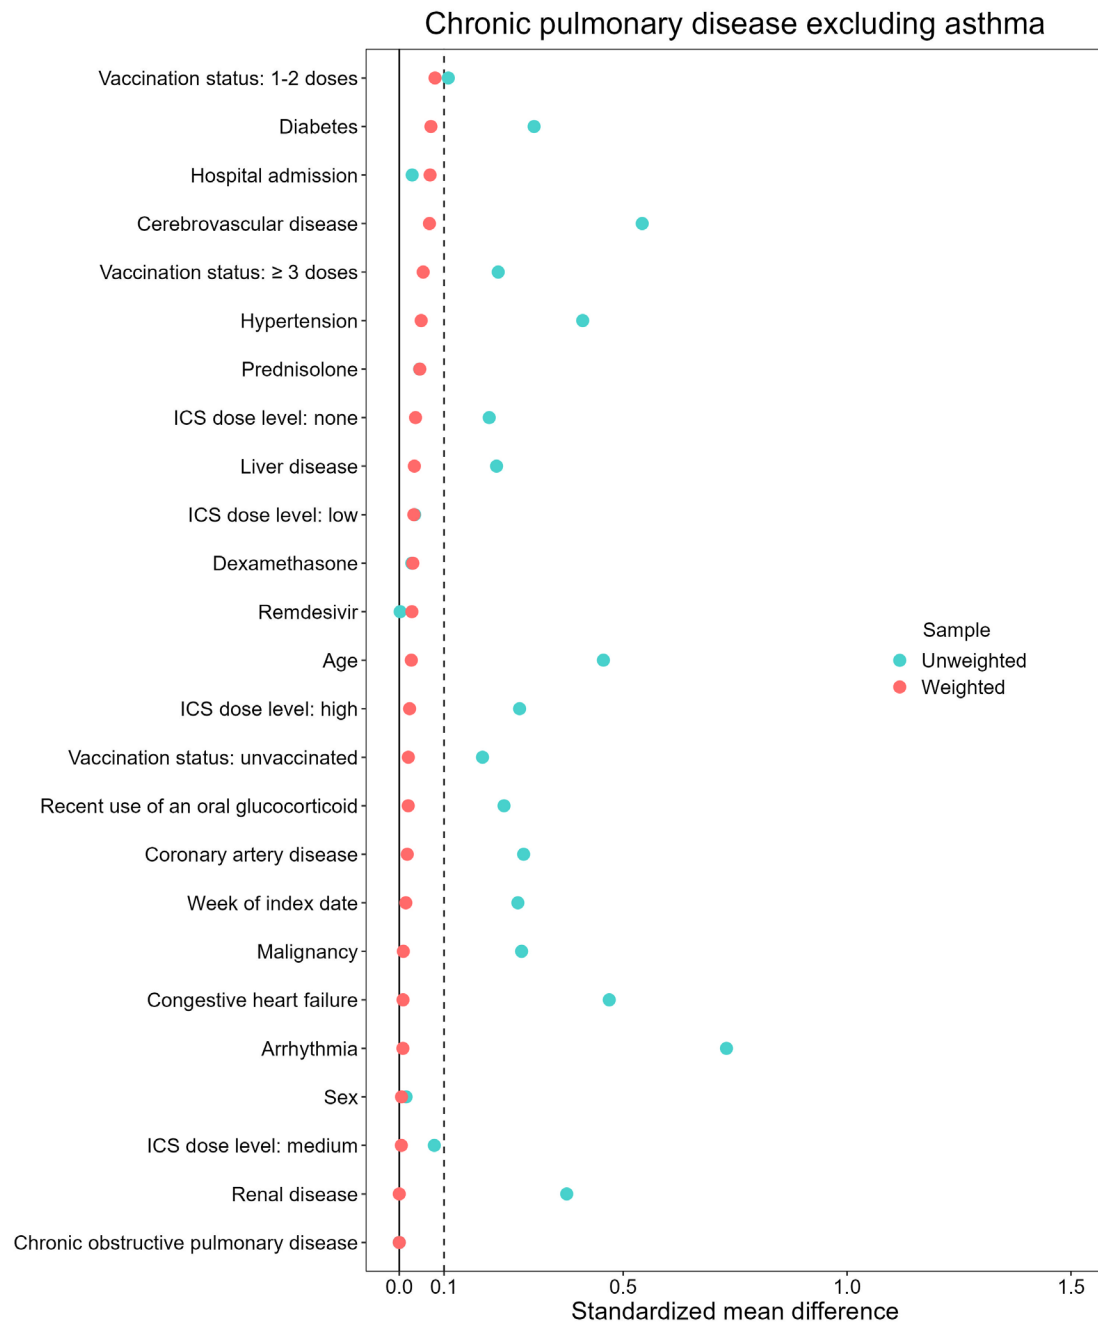

**Supplement Figure 7A. Standardized mean difference for each covariate in the comparison between the nirmatrelvir/ritonavir group and control group for the outcome of acute respiratory distress syndrome before and after weighting**

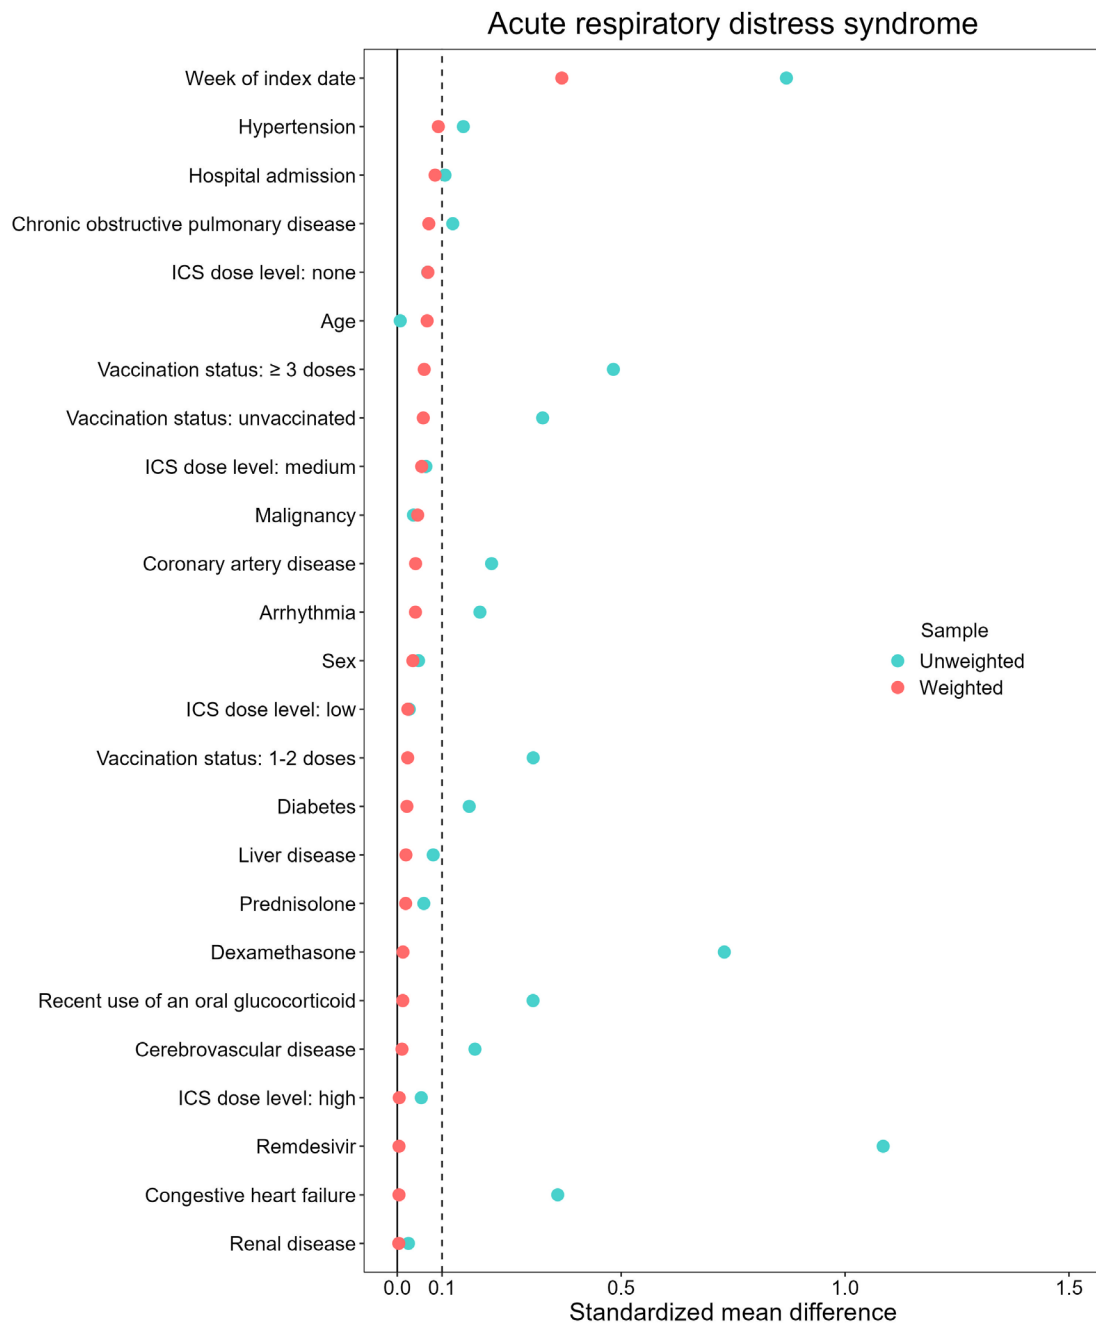

**Supplement Figure 7B. Standardized mean difference for each covariate in the comparison between the molnupiravir group and control group for the outcome of acute respiratory distress syndrome before and after weighting**

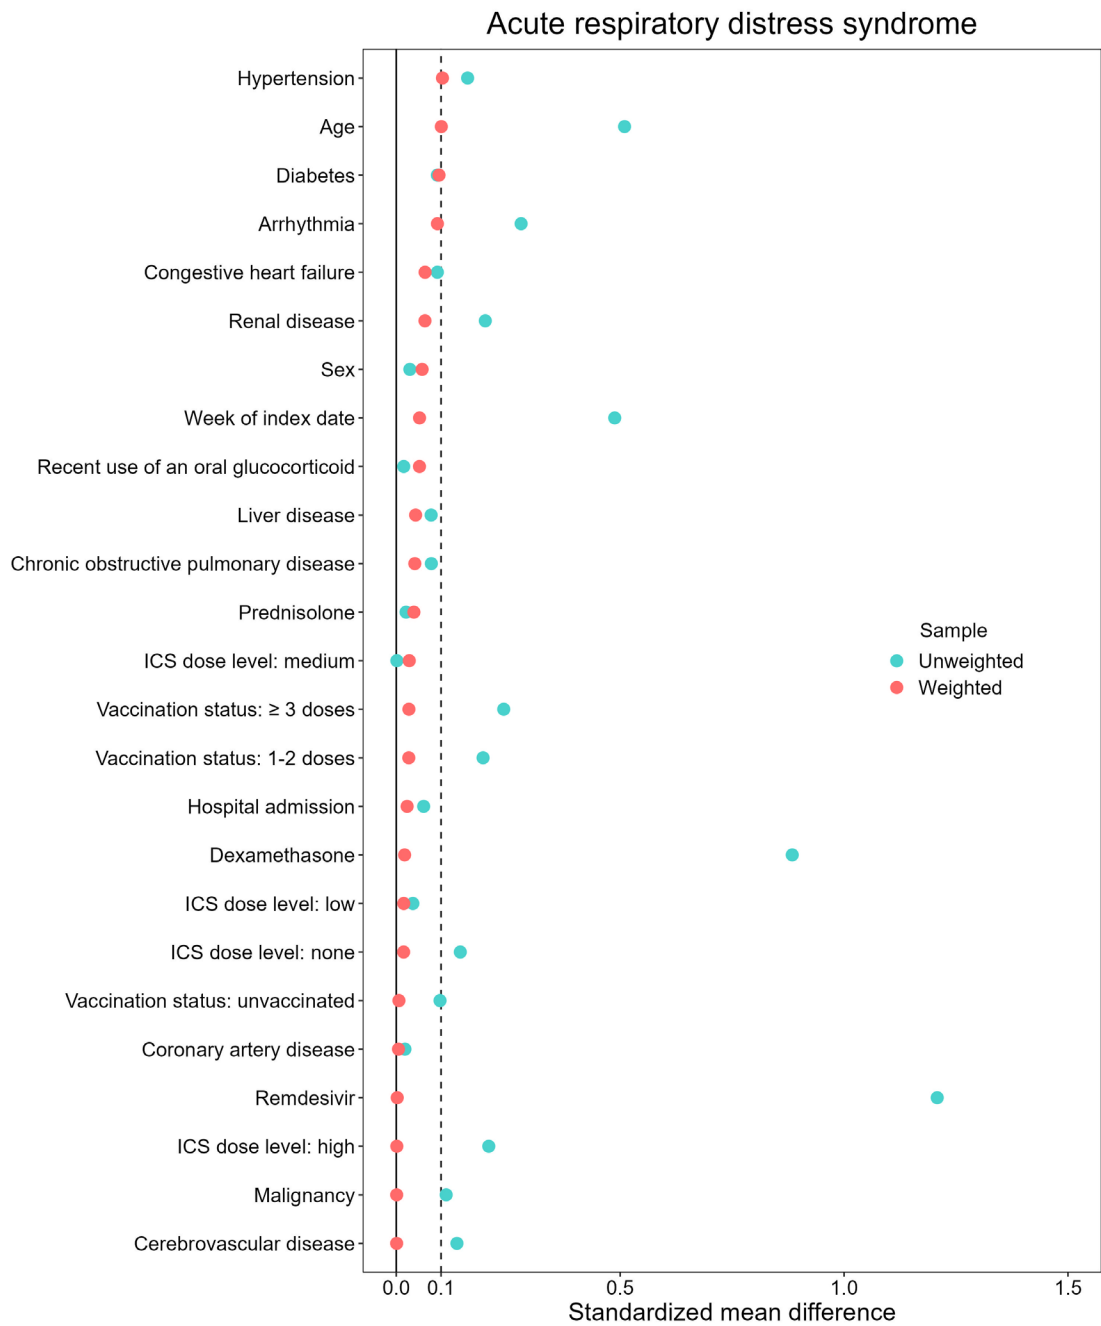

**Supplement Figure 7C. Standardized mean difference for each covariate in the comparison between the nirmatrelvir/ritonavir group and molnupiravir group for the outcome of acute respiratory distress syndrome before and after weighting**

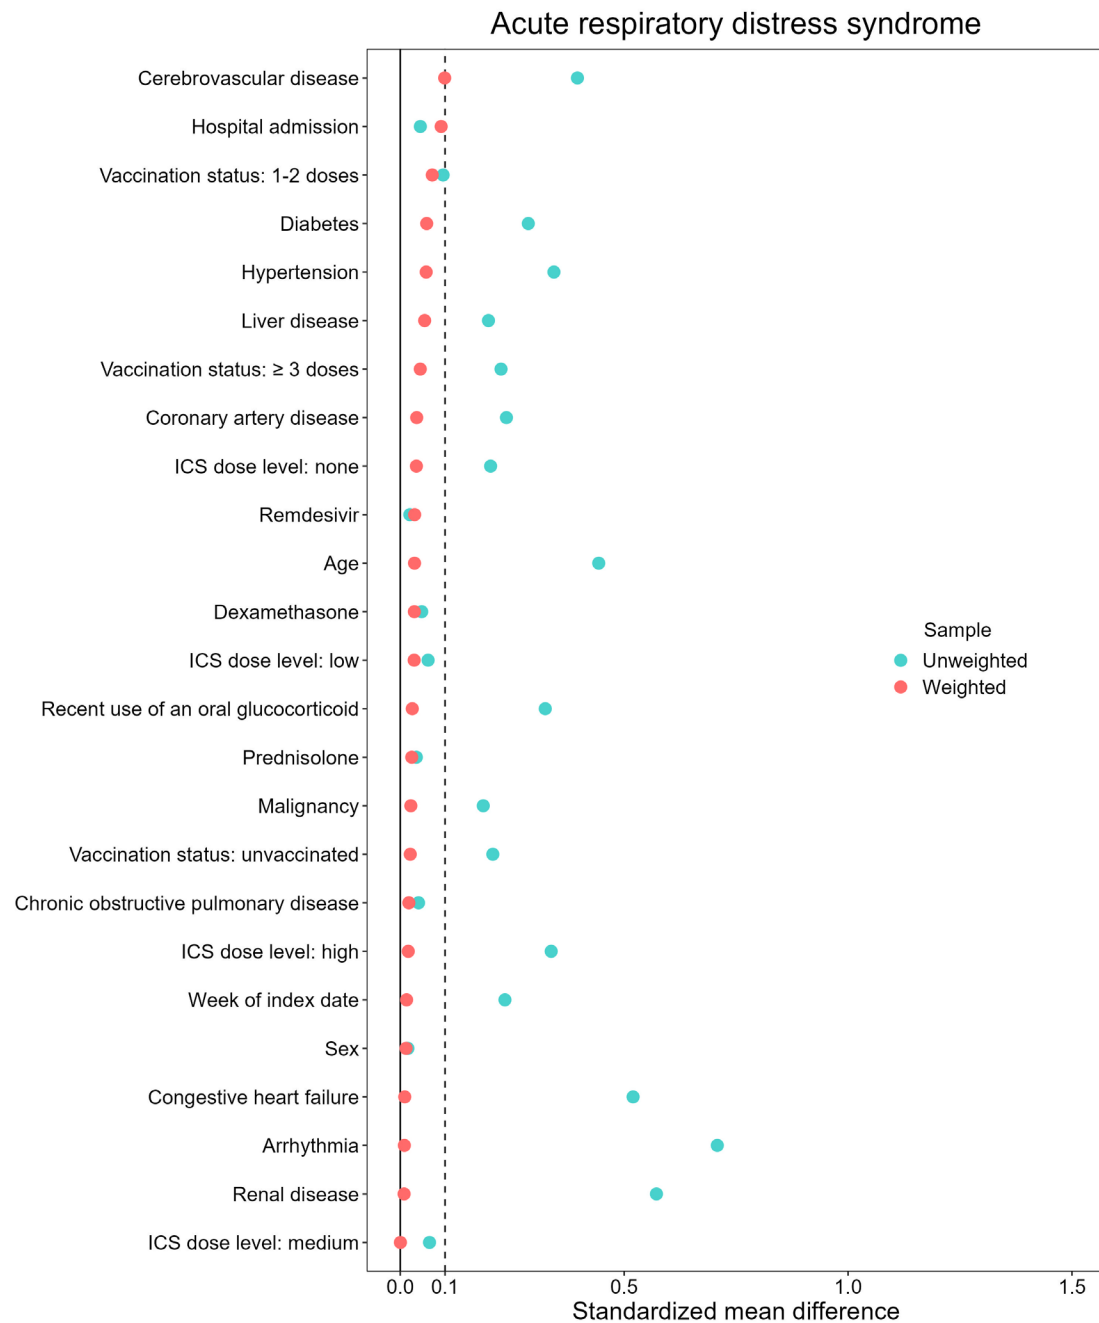

**Supplement Figure 8A. Standardized mean difference for each covariate in the comparison between the nirmatrelvir/ritonavir group and control group for the outcome of myocardial infarction before and after weighting**

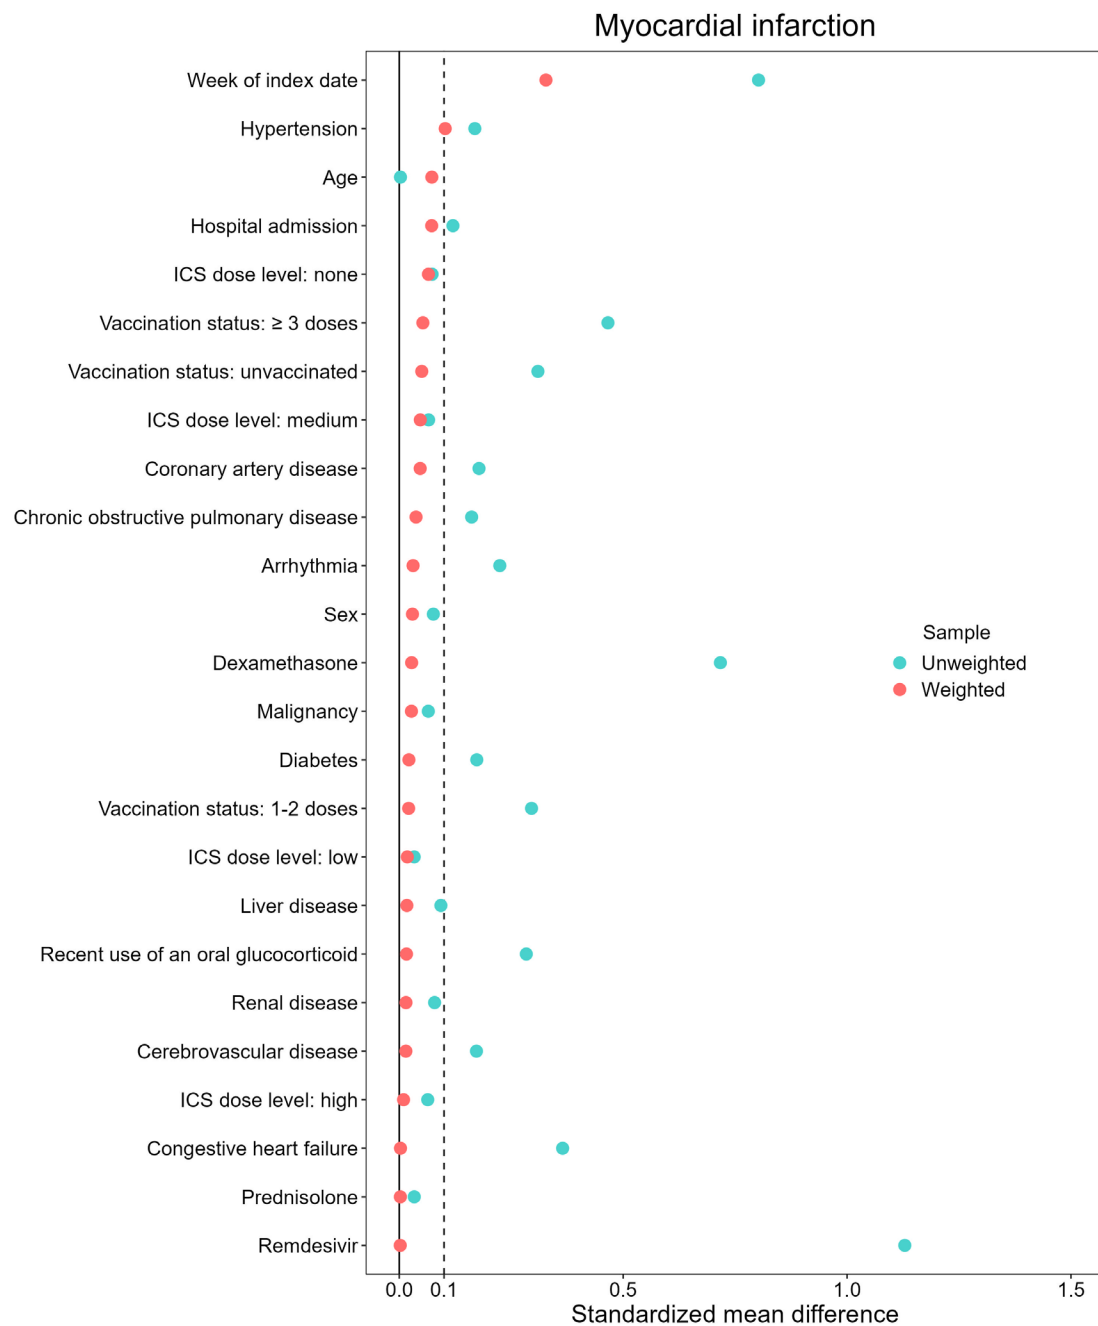



**Supplement Figure 8B. Standardized mean difference for each covariate in the comparison between the molnupiravir group and control group for the outcome of myocardial infarction before and after weighting**

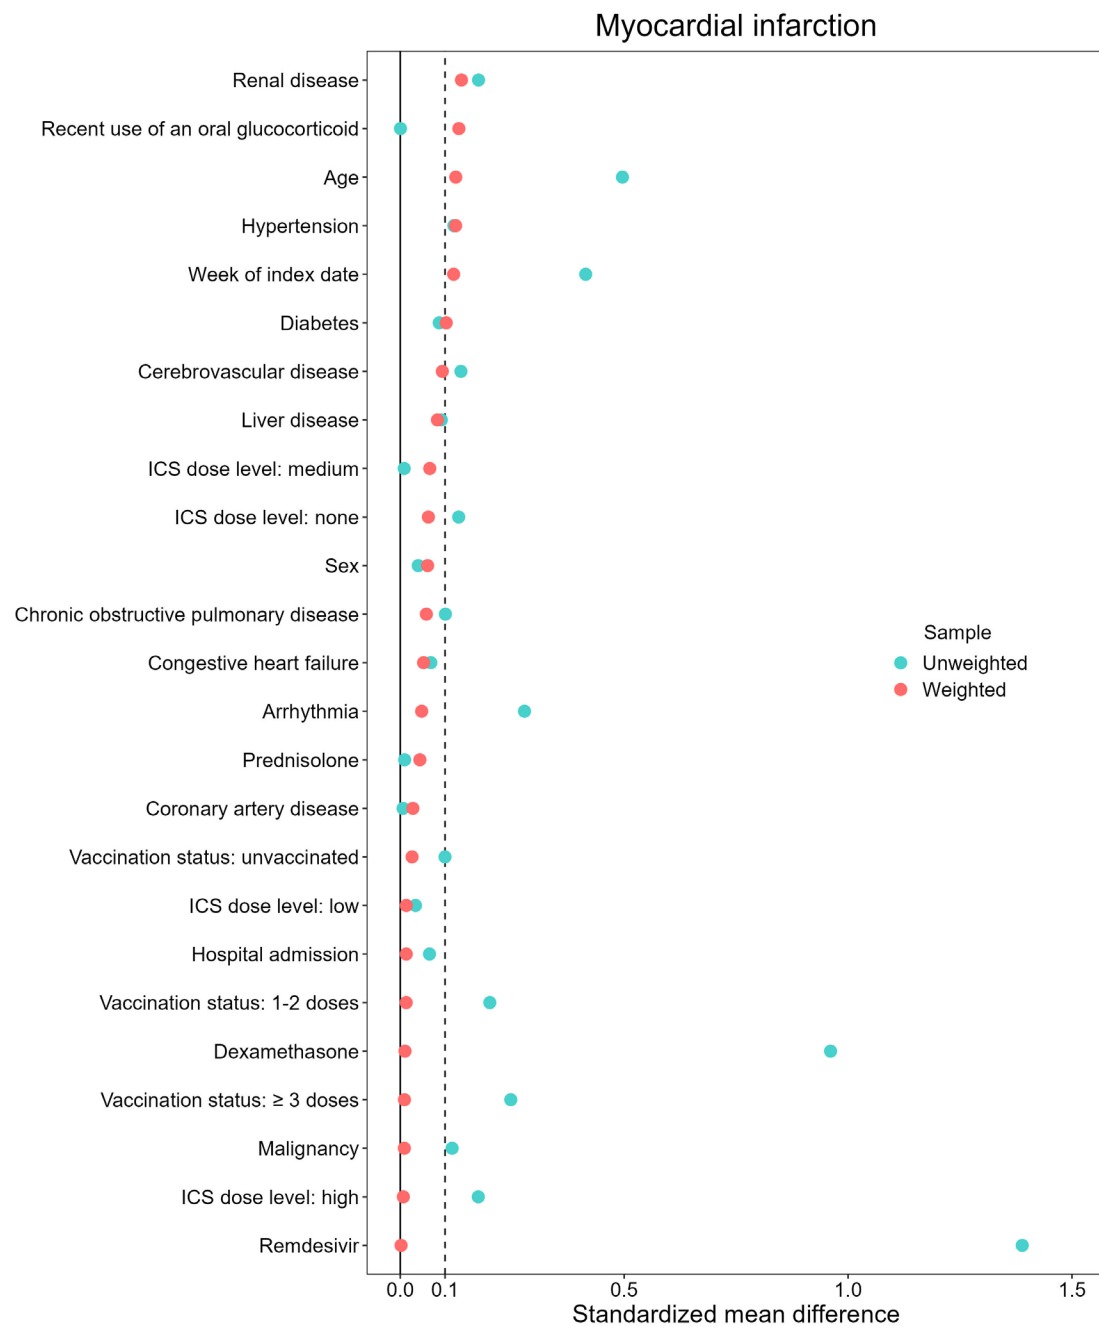

**Supplement Figure 8C. Standardized mean difference for each covariate in the comparison between the nirmatrelvir/ritonavir group and molnupiravir group for the outcome of myocardial infarction before and after weighting**

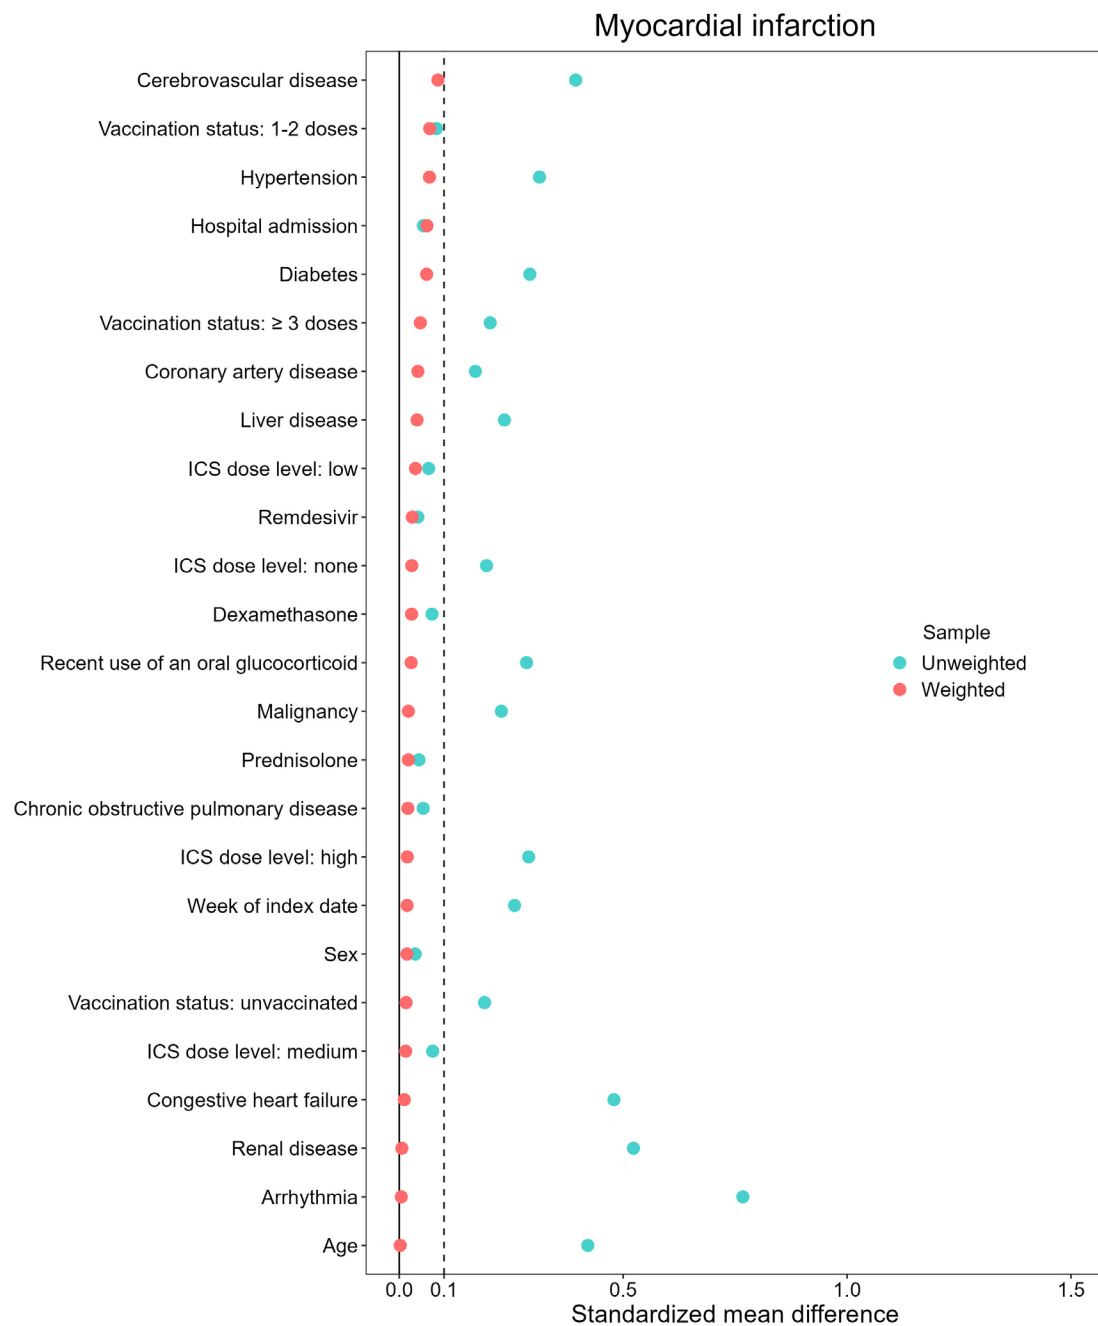

**Supplement Figure 9A. Standardized mean difference for each covariate in the comparison between the nirmatrelvir/ritonavir group and control group for the outcome of stroke before and after weighting**

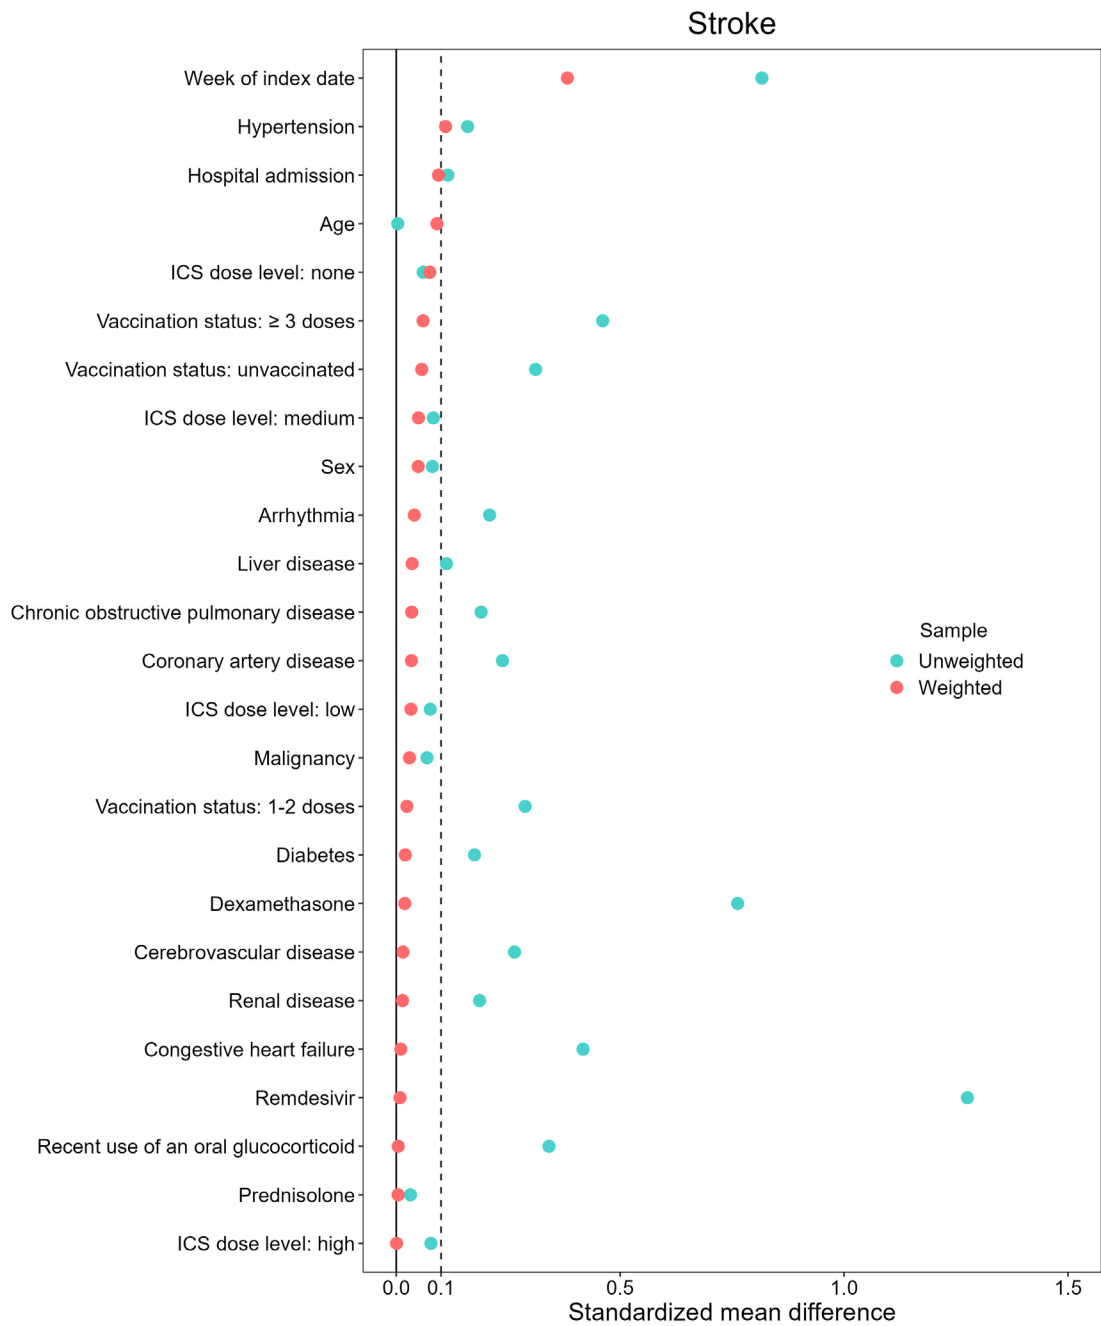

**Supplement Figure 9B. Standardized mean difference for each covariate in the comparison between the molnupiravir group and control group for the outcome of stroke before and after weighting**

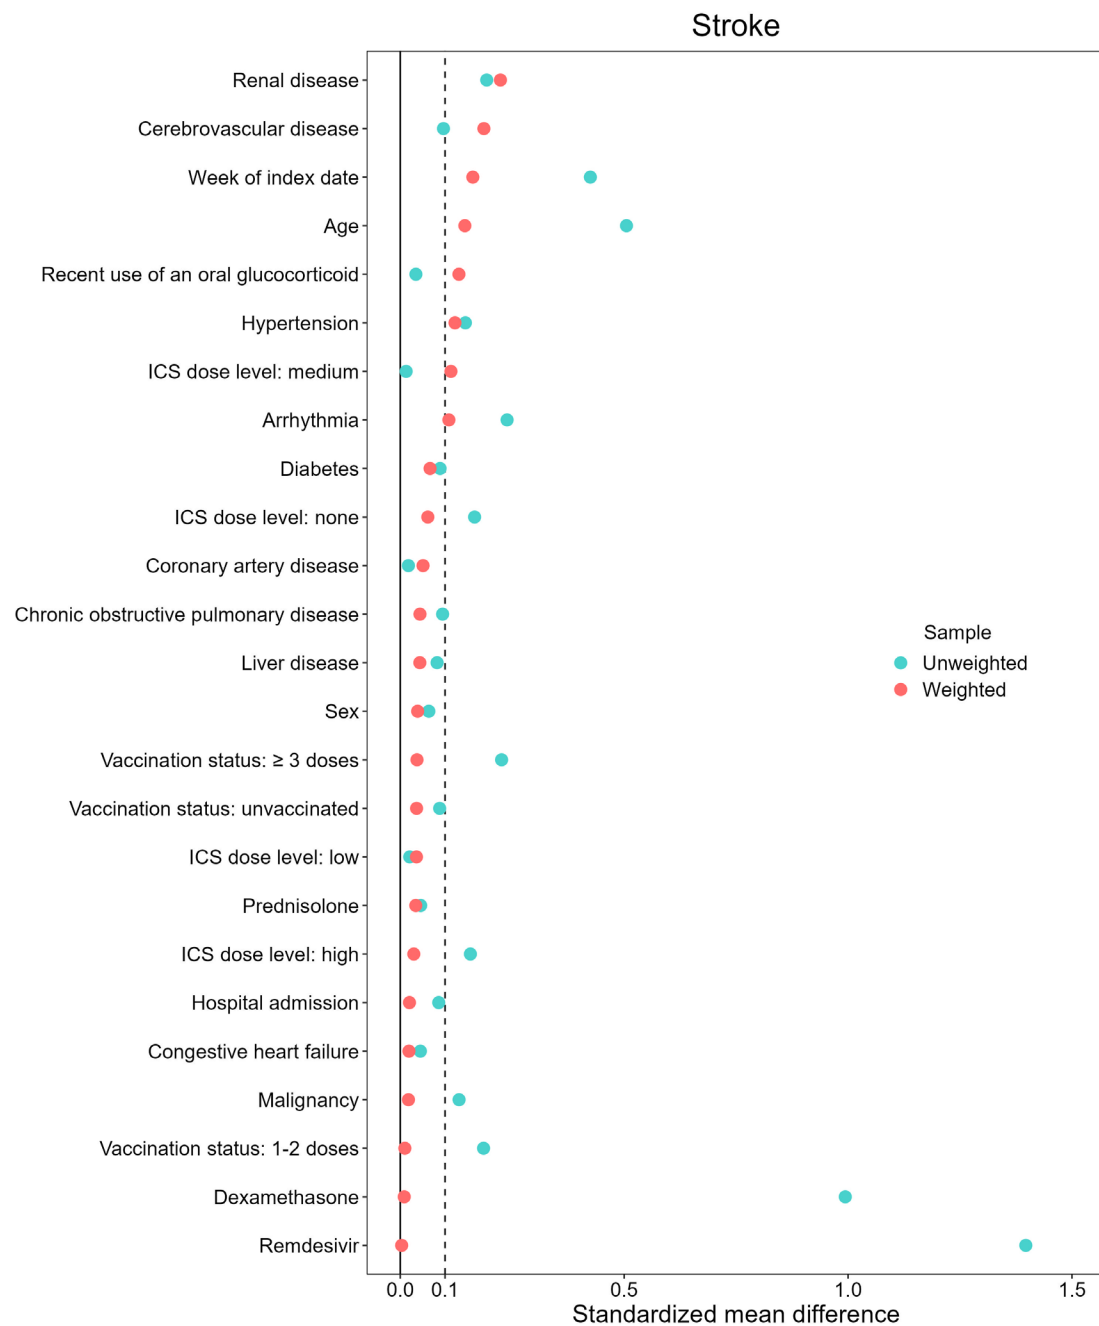

**Supplement Figure 9C. Standardized mean difference for each covariate in the comparison between the nirmatrelvir/ritonavir group and molnupiravir group for the outcome of stroke before and after weighting**

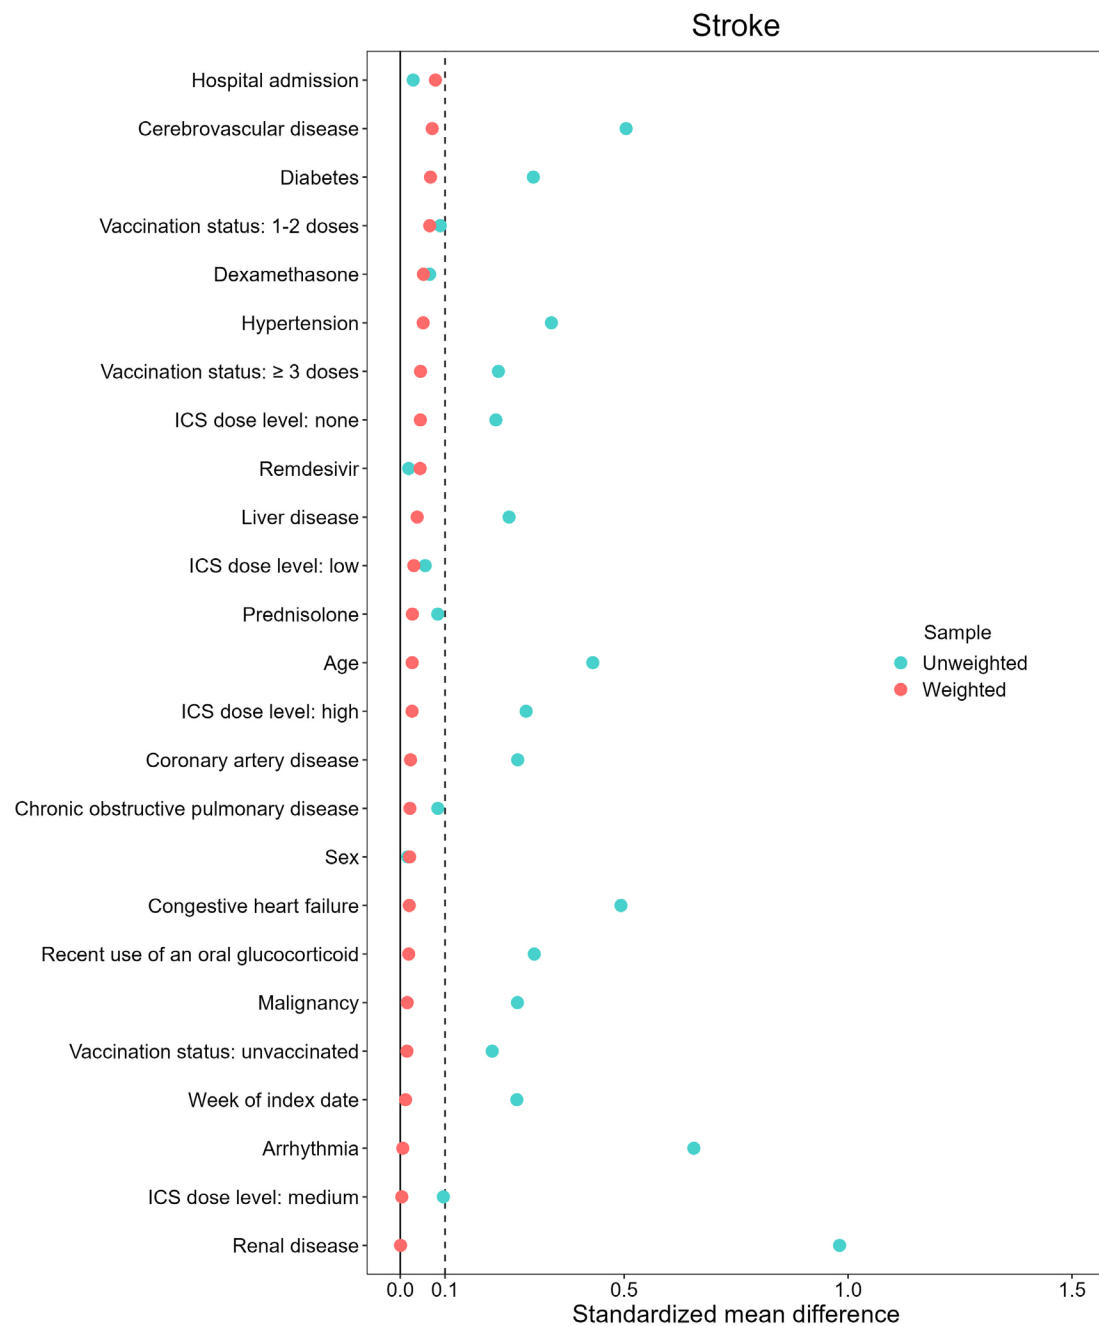

**Supplement Figure 10A. Standardized mean difference for each covariate in the comparison between the nirmatrelvir/ritonavir group and control group for the outcome of asthma exacerbation before and after weighting**

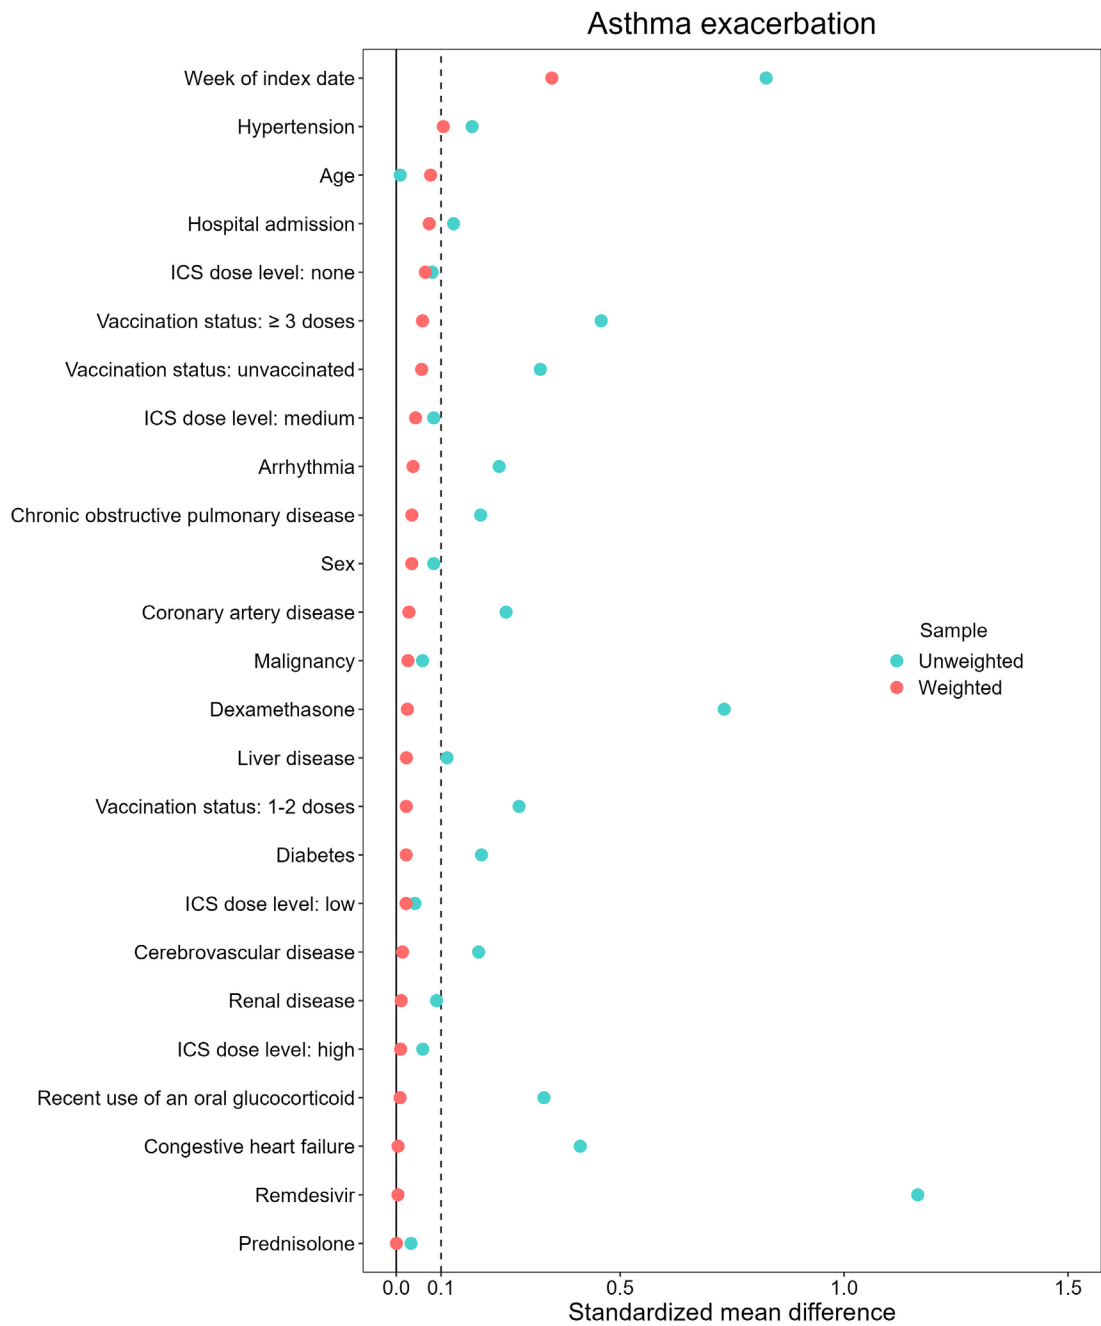

**Supplement Figure 10B. Standardized mean difference for each covariate in the comparison between the molnupiravir group and control group for the outcome of asthma exacerbation before and after weighting**

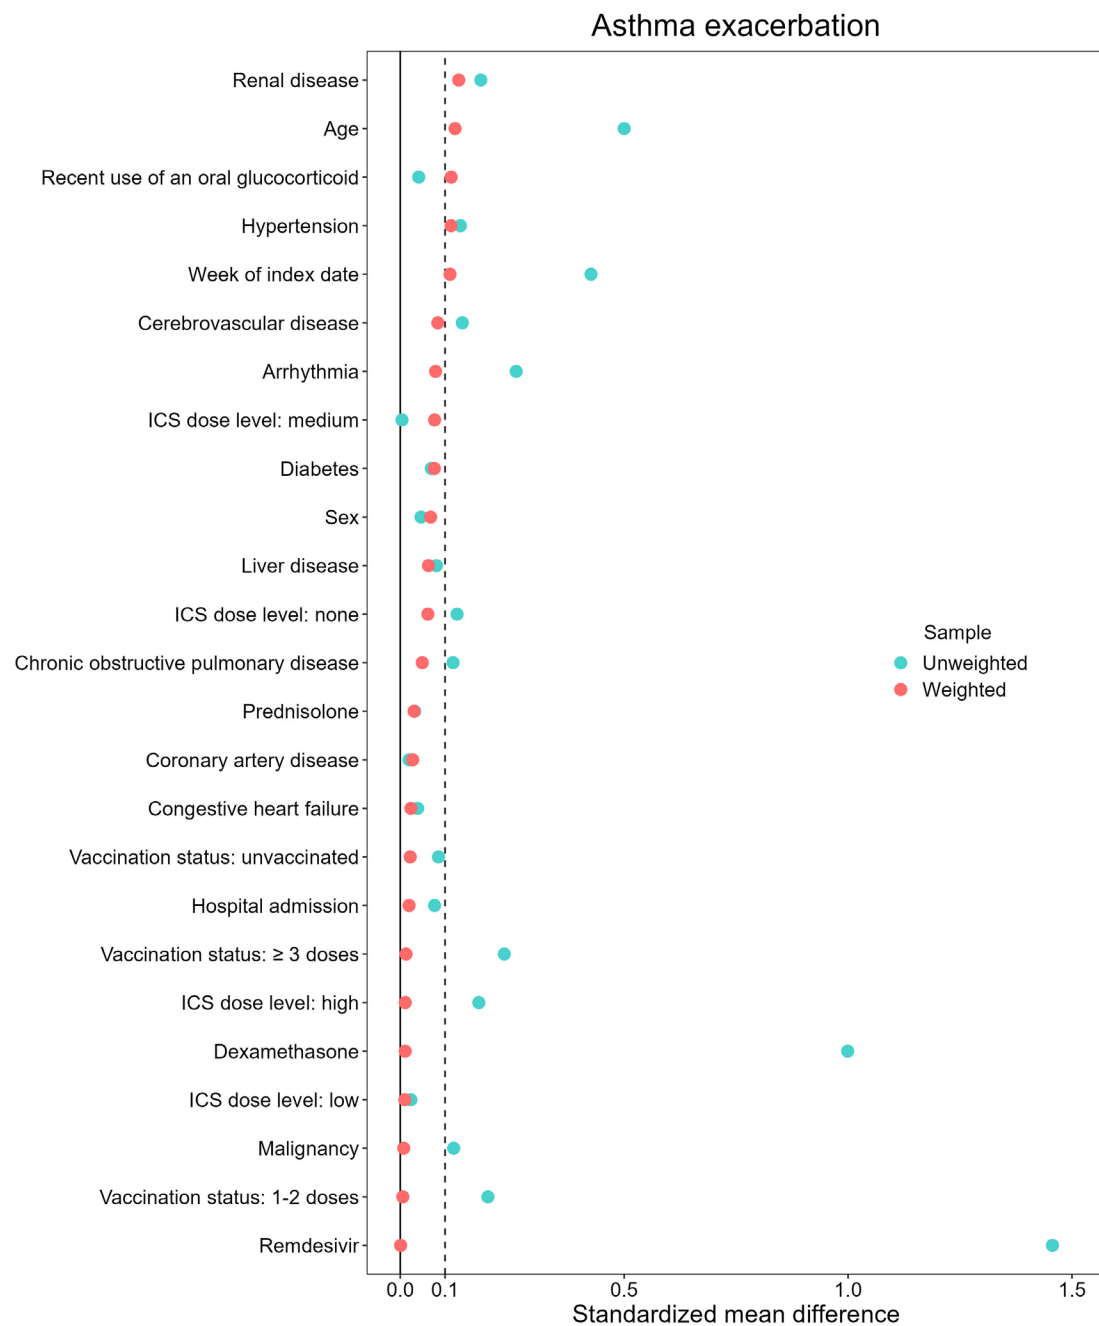

**Supplement Figure 10C. Standardized mean difference for each covariate in the comparison between the nirmatrelvir/ritonavir group and molnupiravir group for the outcome of asthma exacerbation before and after weighting**

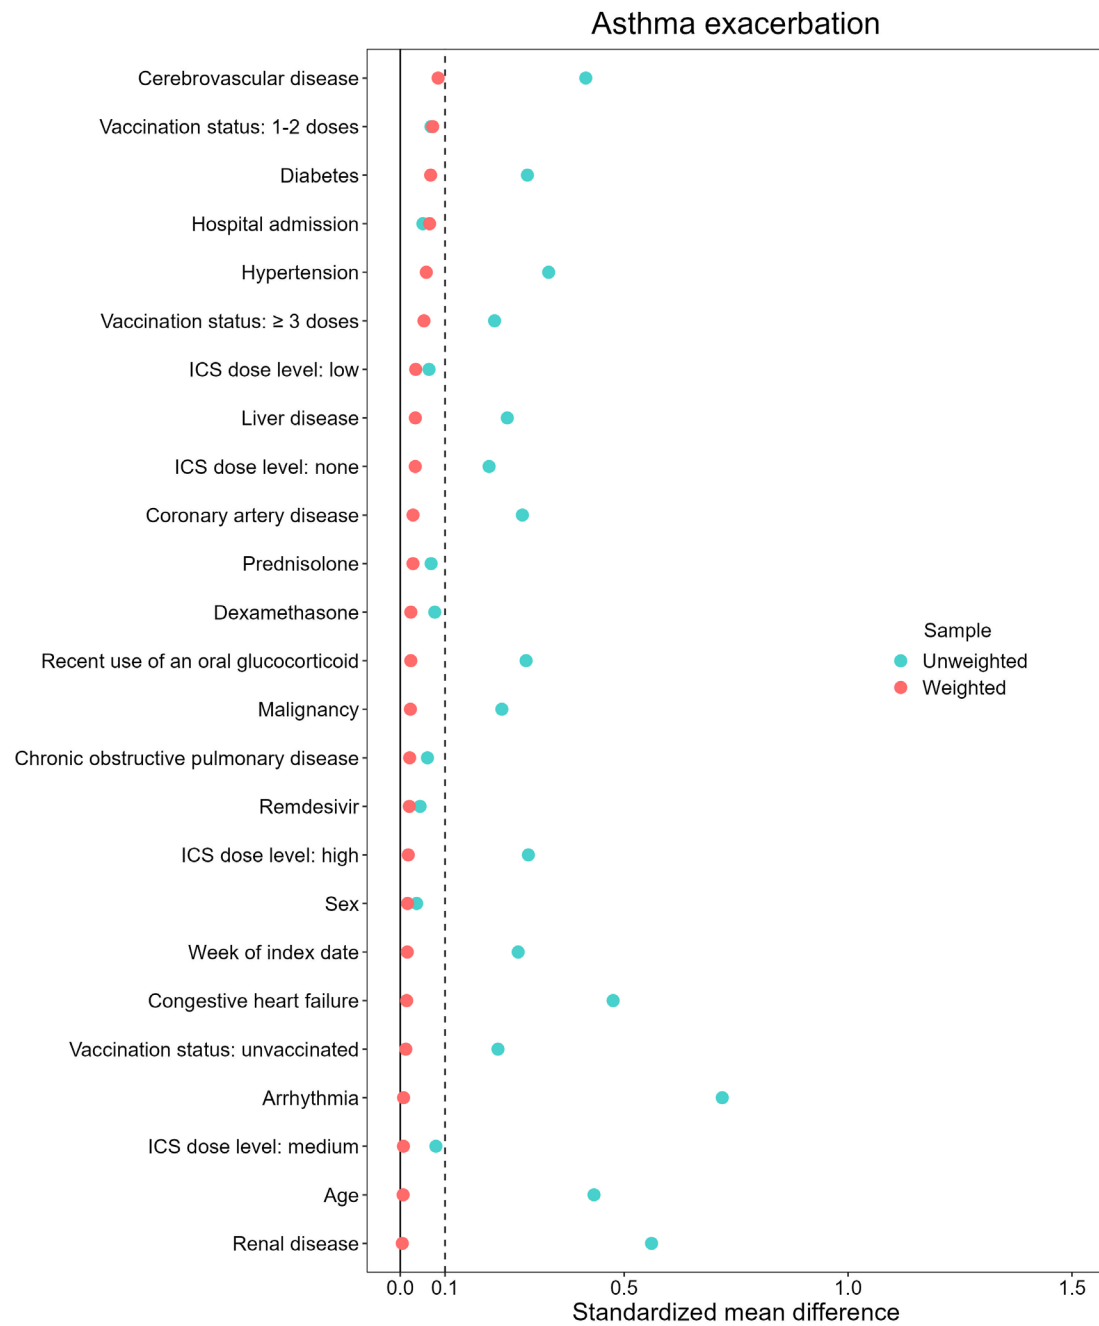



**Supplement Figure 11A. Scaled Schoenfeld residual plots for the comparison between the nirmatrelvir/ritonavir group and control group**

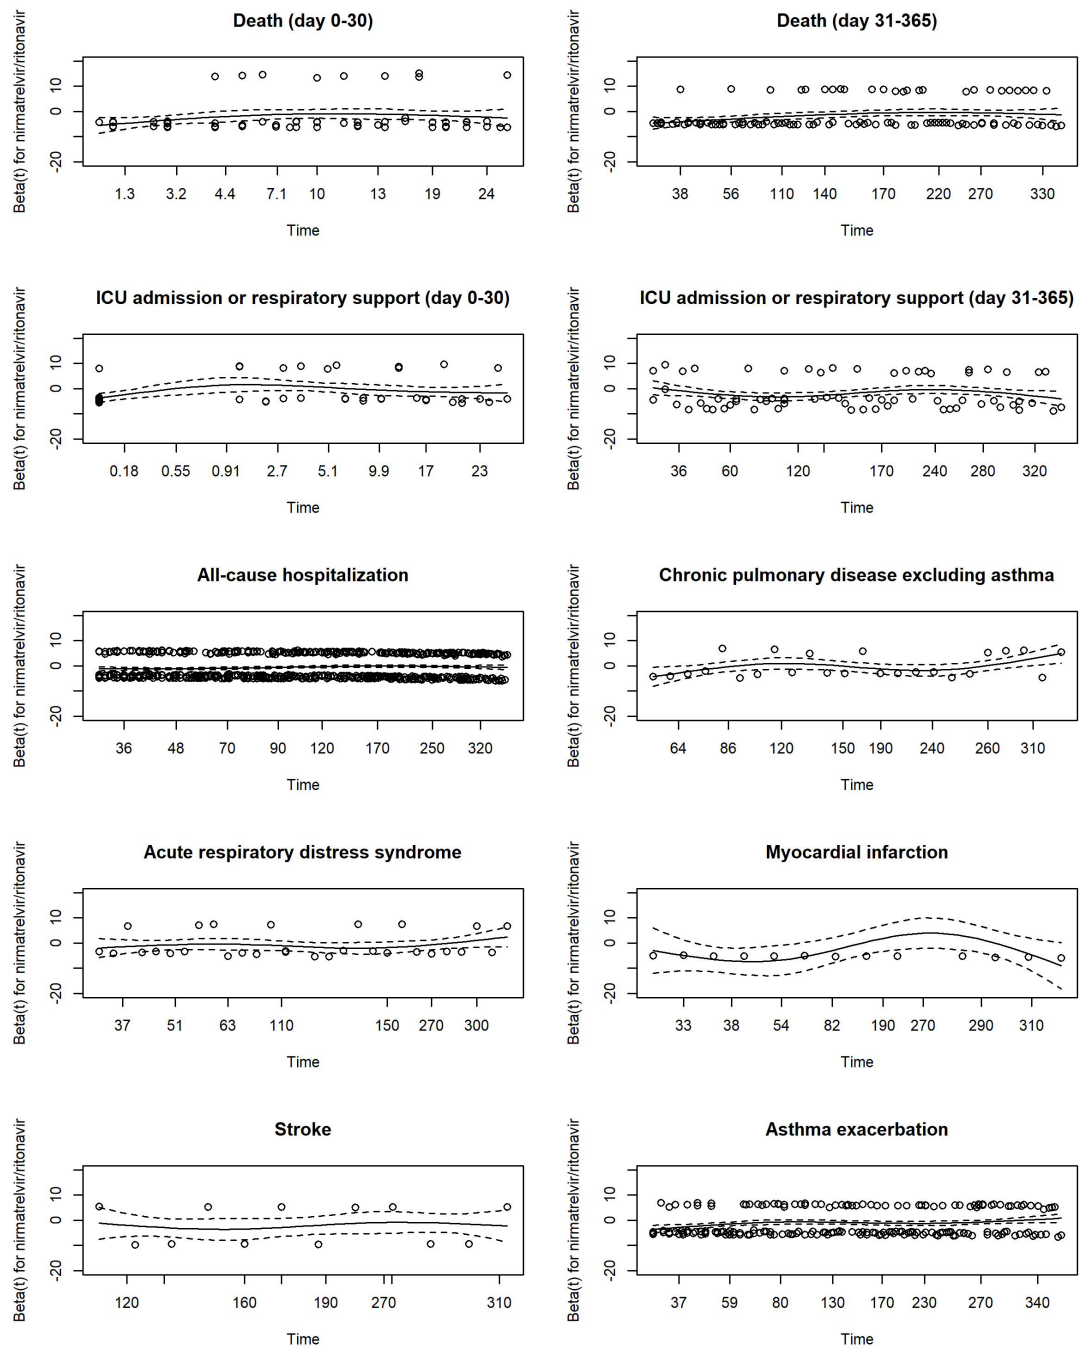

**Supplement Figure 11B. Scaled Schoenfeld residual plots for the comparison between the molnupiravir group and control group**

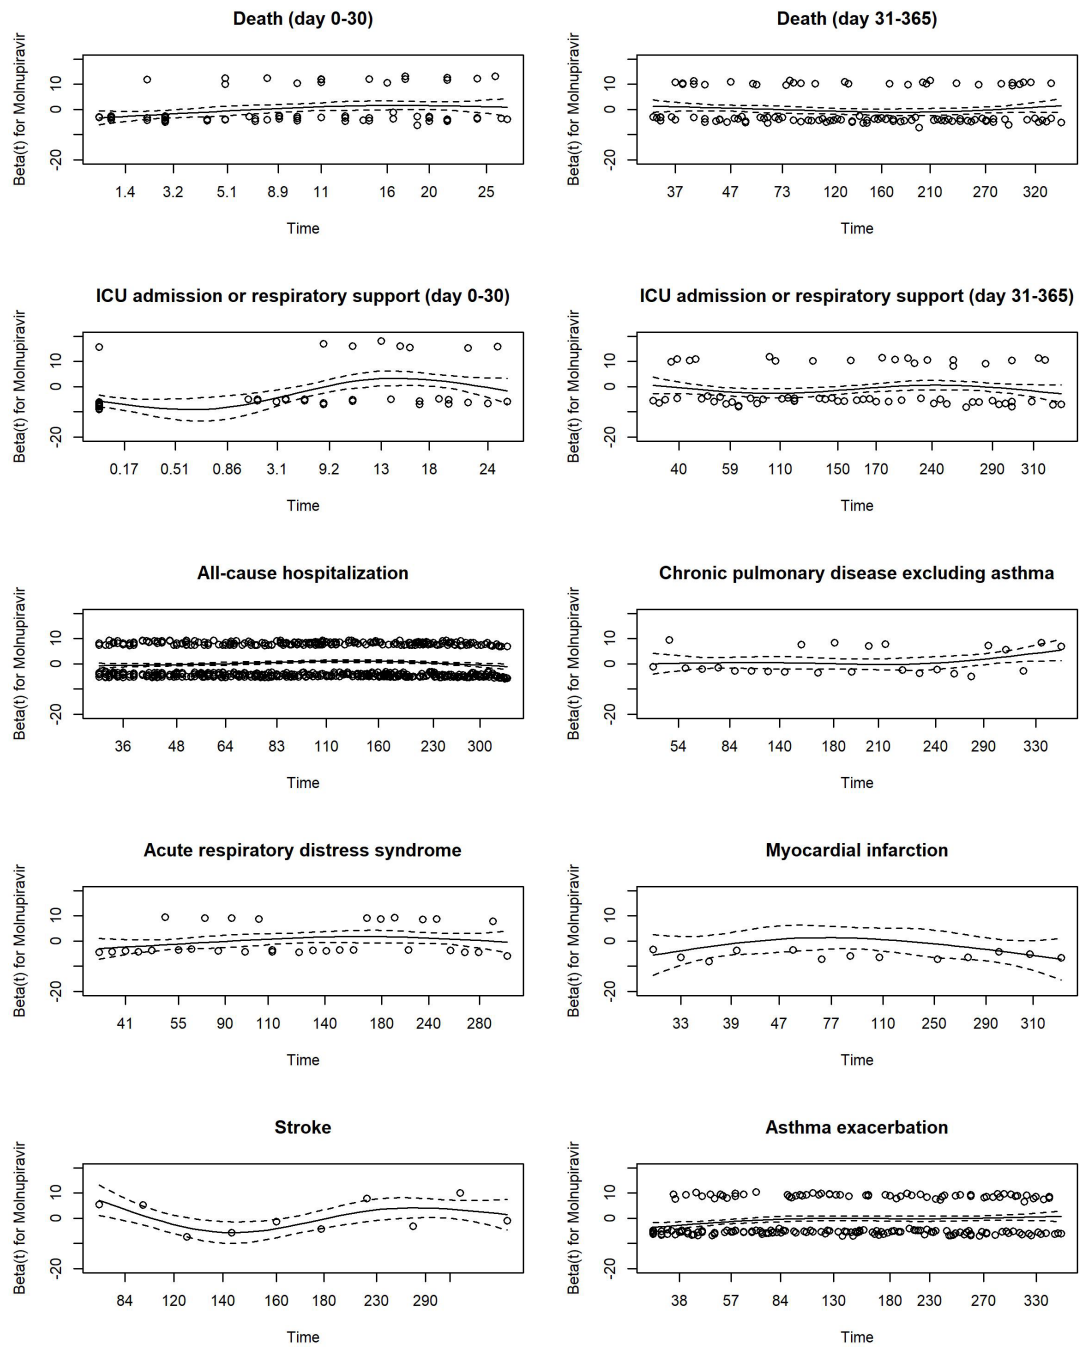

**Supplement Figure 11C. Scaled Schoenfeld residual plots for the comparison between the nirmatrelvir/ritonavir group and molnupiravir group**

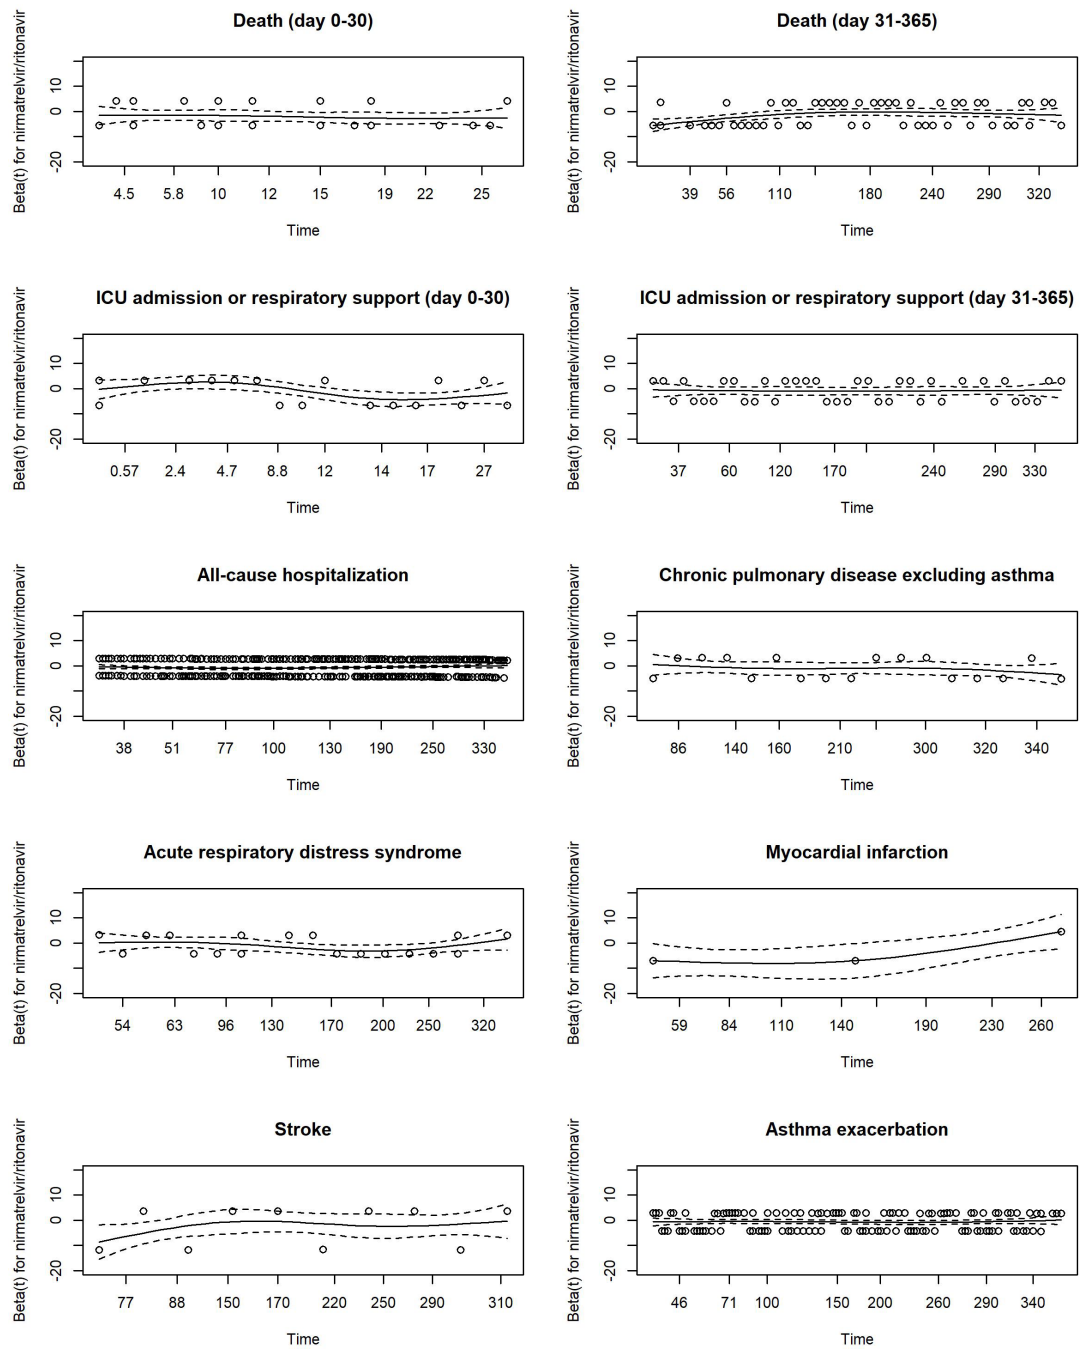

**Supplement Figure 12A. Subgroup analysis: vaccination status in the comparison between the nirmatrelvir/ritonavir group and control group**

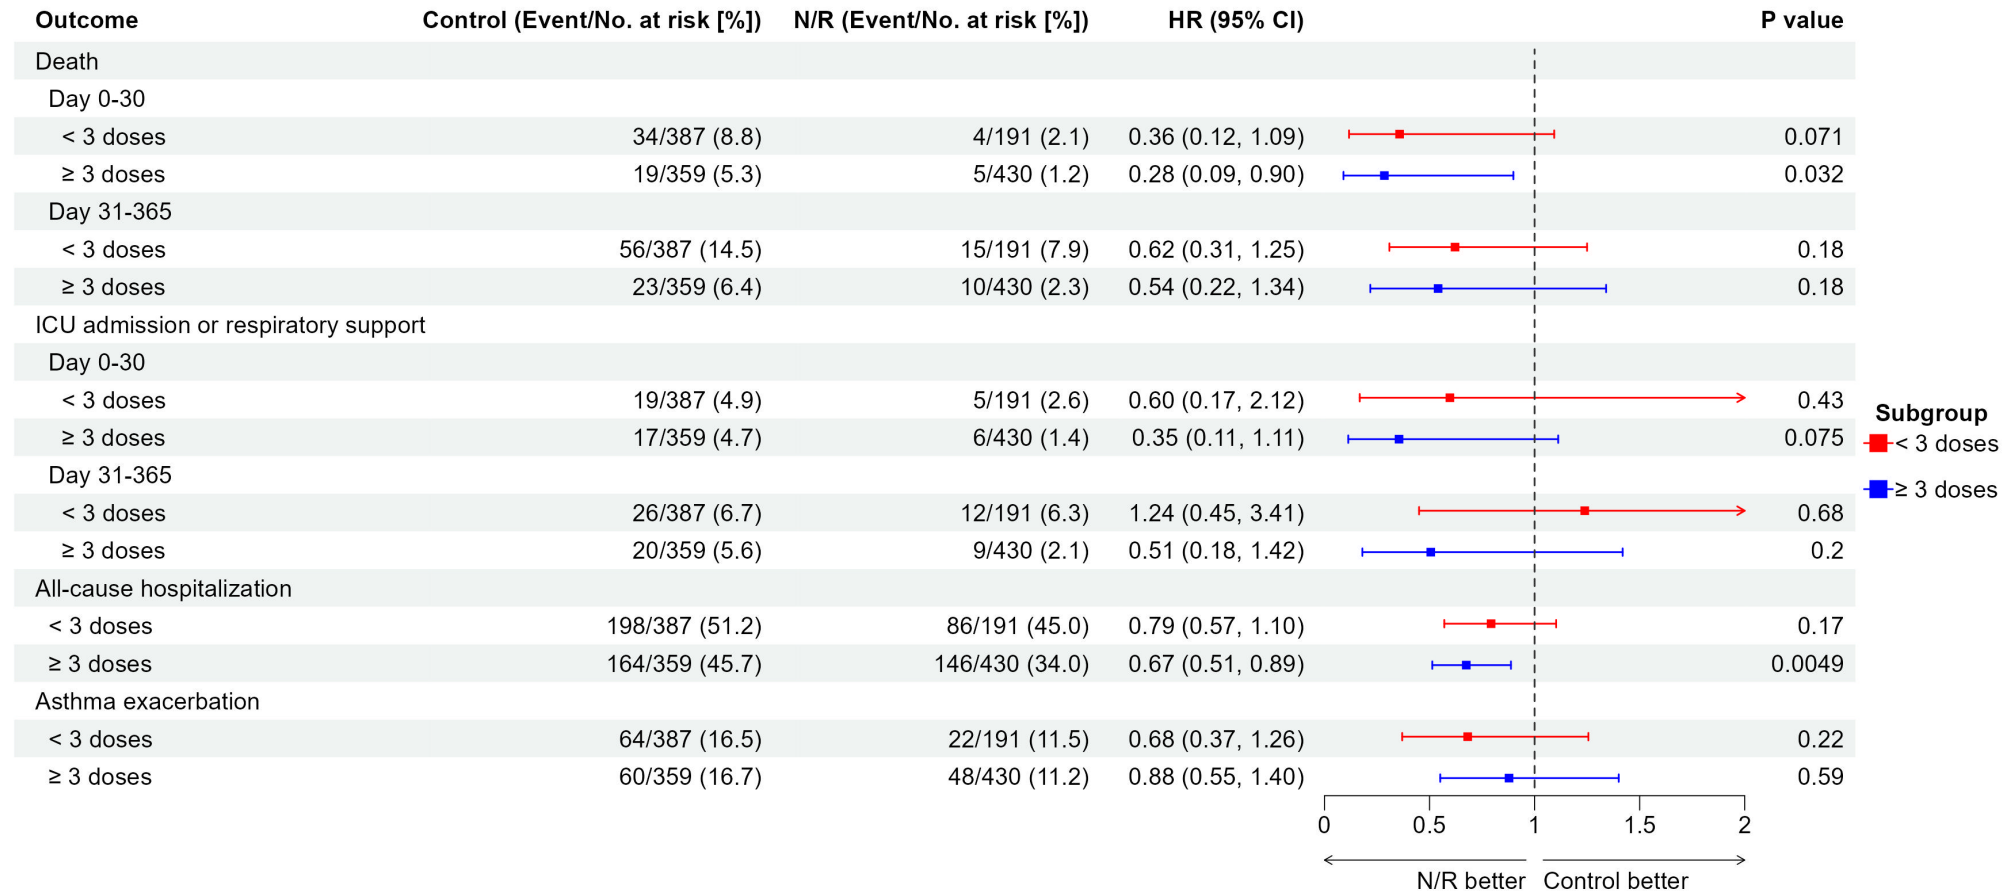

**Supplement Figure 12B. Subgroup analysis: vaccination status in the comparison between the molnupiravir group and control group**

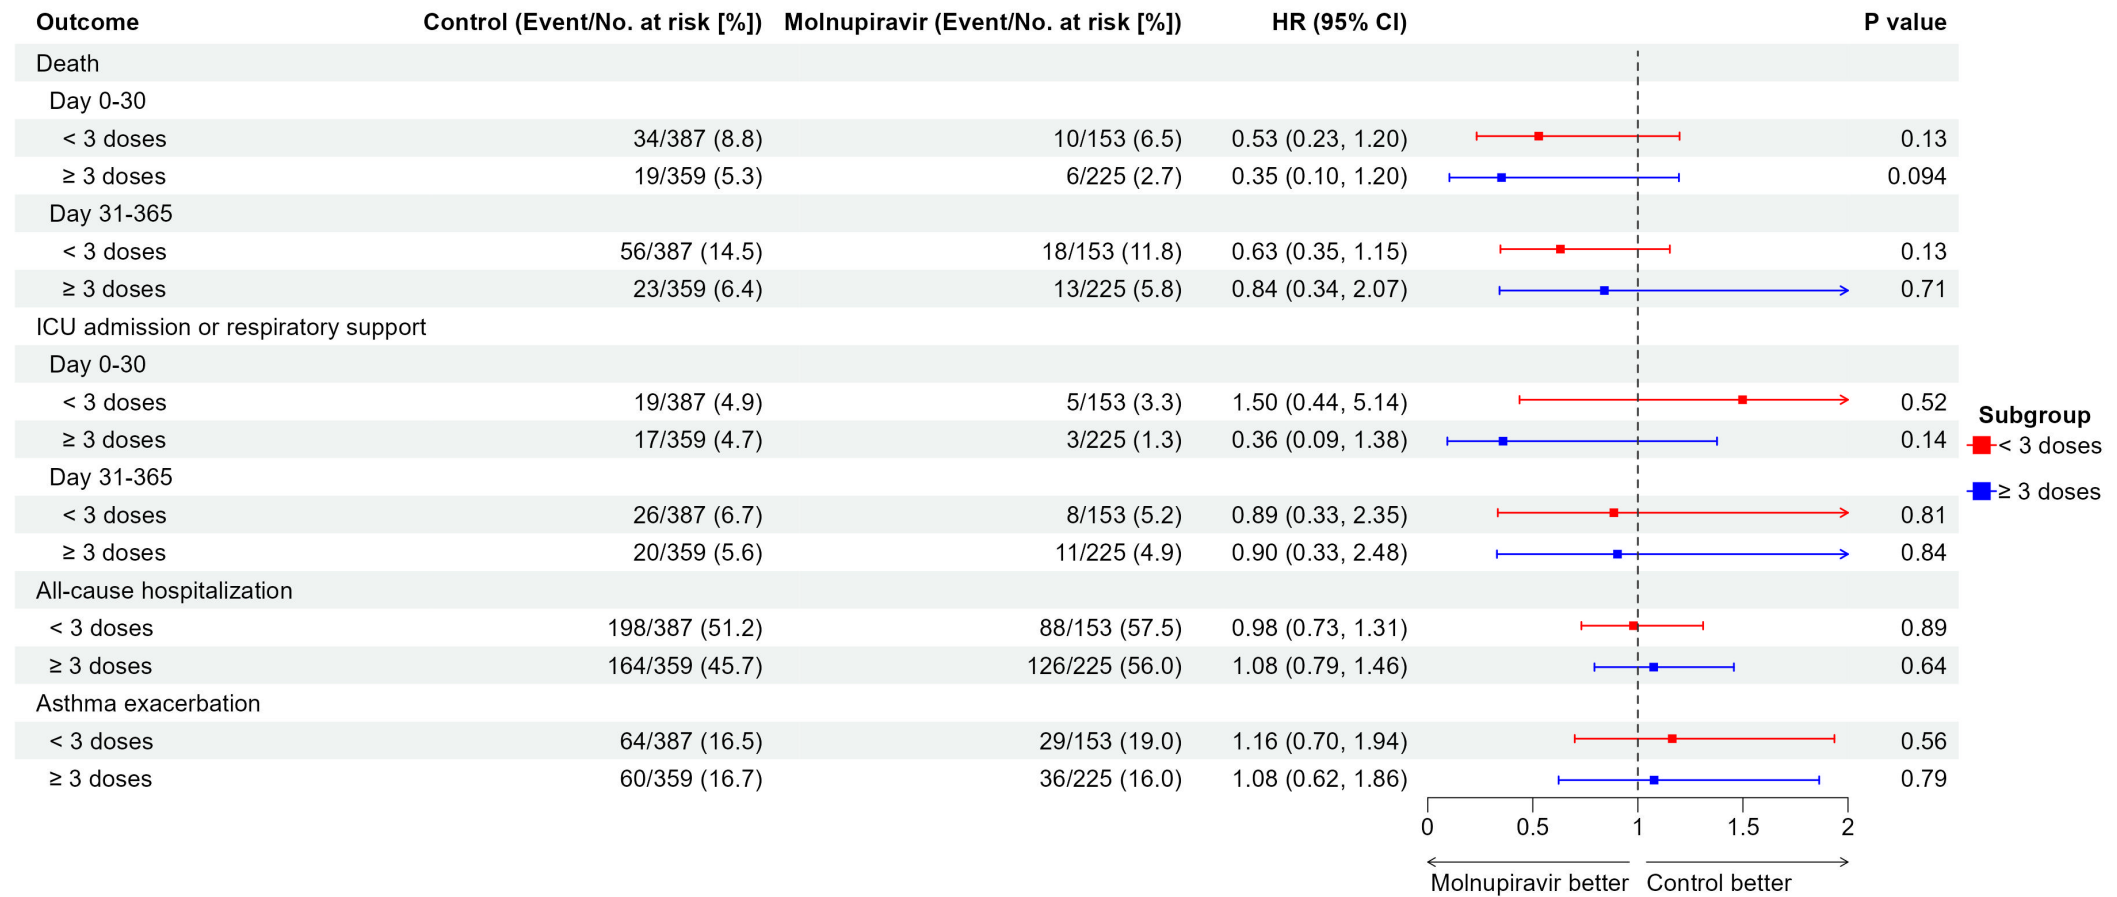

**Supplement Figure 12C. Subgroup analysis: vaccination status in the comparison between the nirmatrelvir/ritonavir group and molnupiravir group**

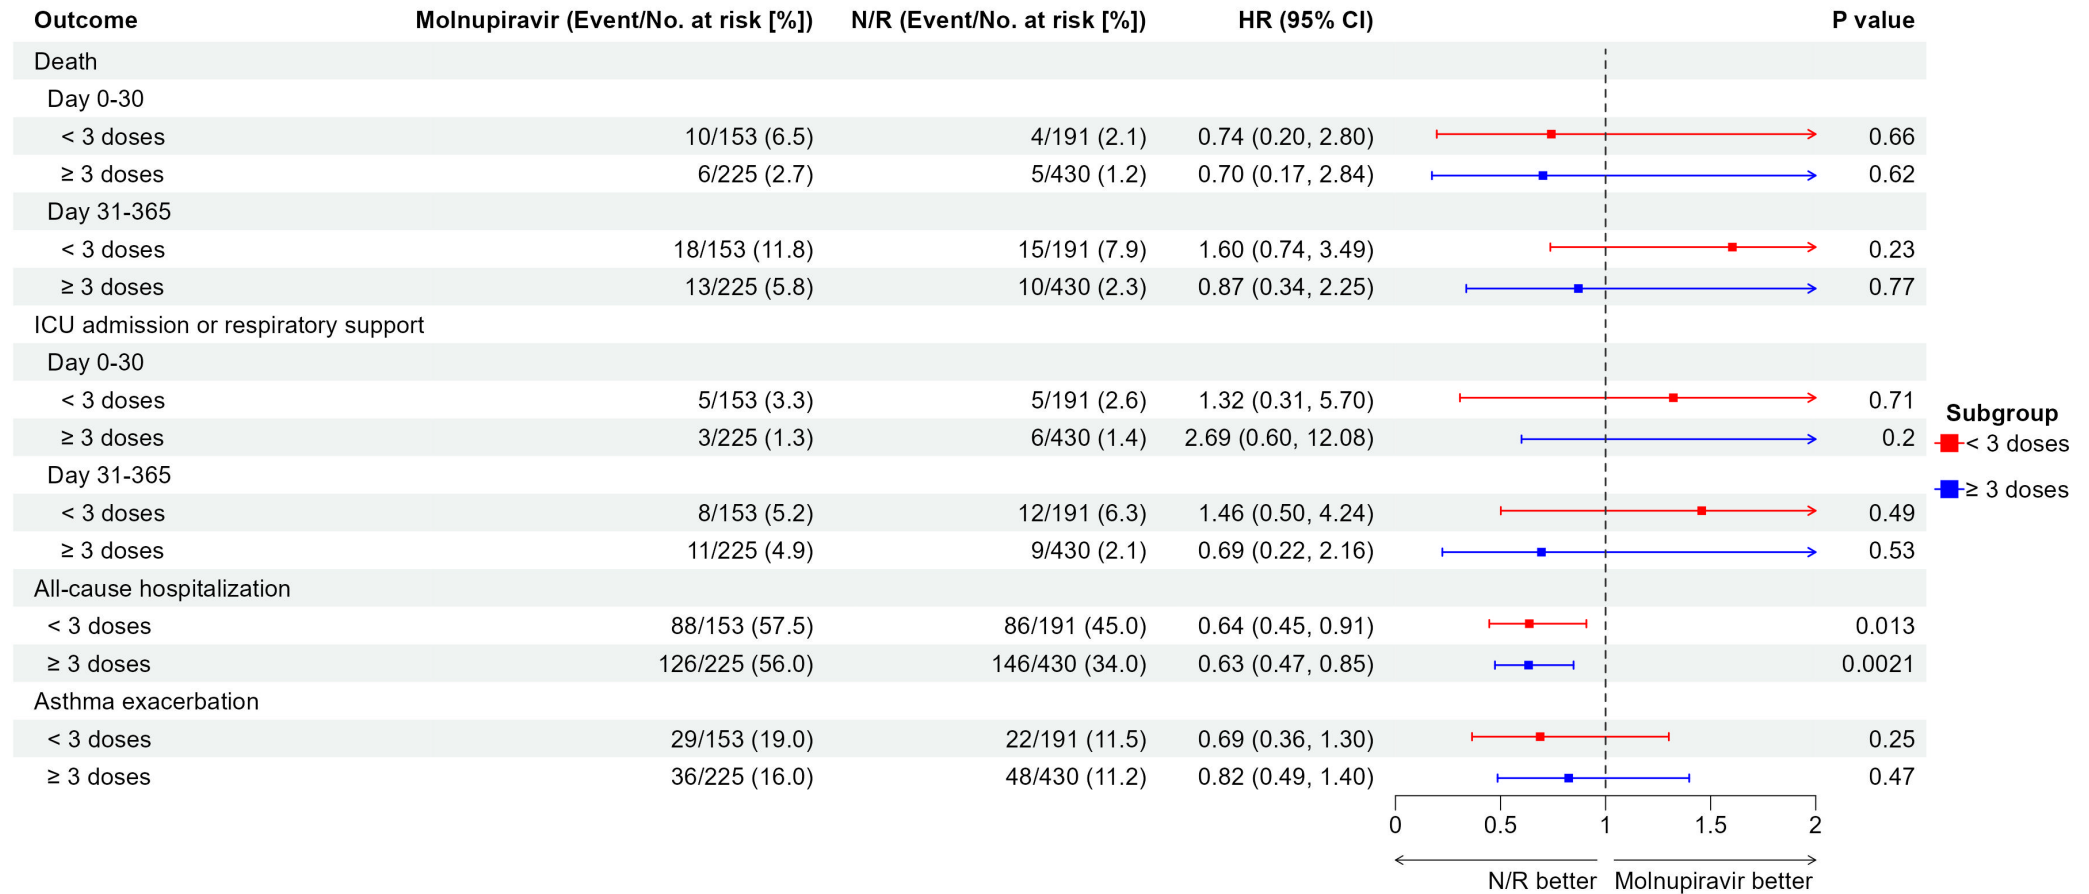

**Supplement Figure 13A. Subgroup analysis: inhaled corticosteroid (ICS) dose level in the comparison between the nirmatrelvir/ritonavir group and control group**

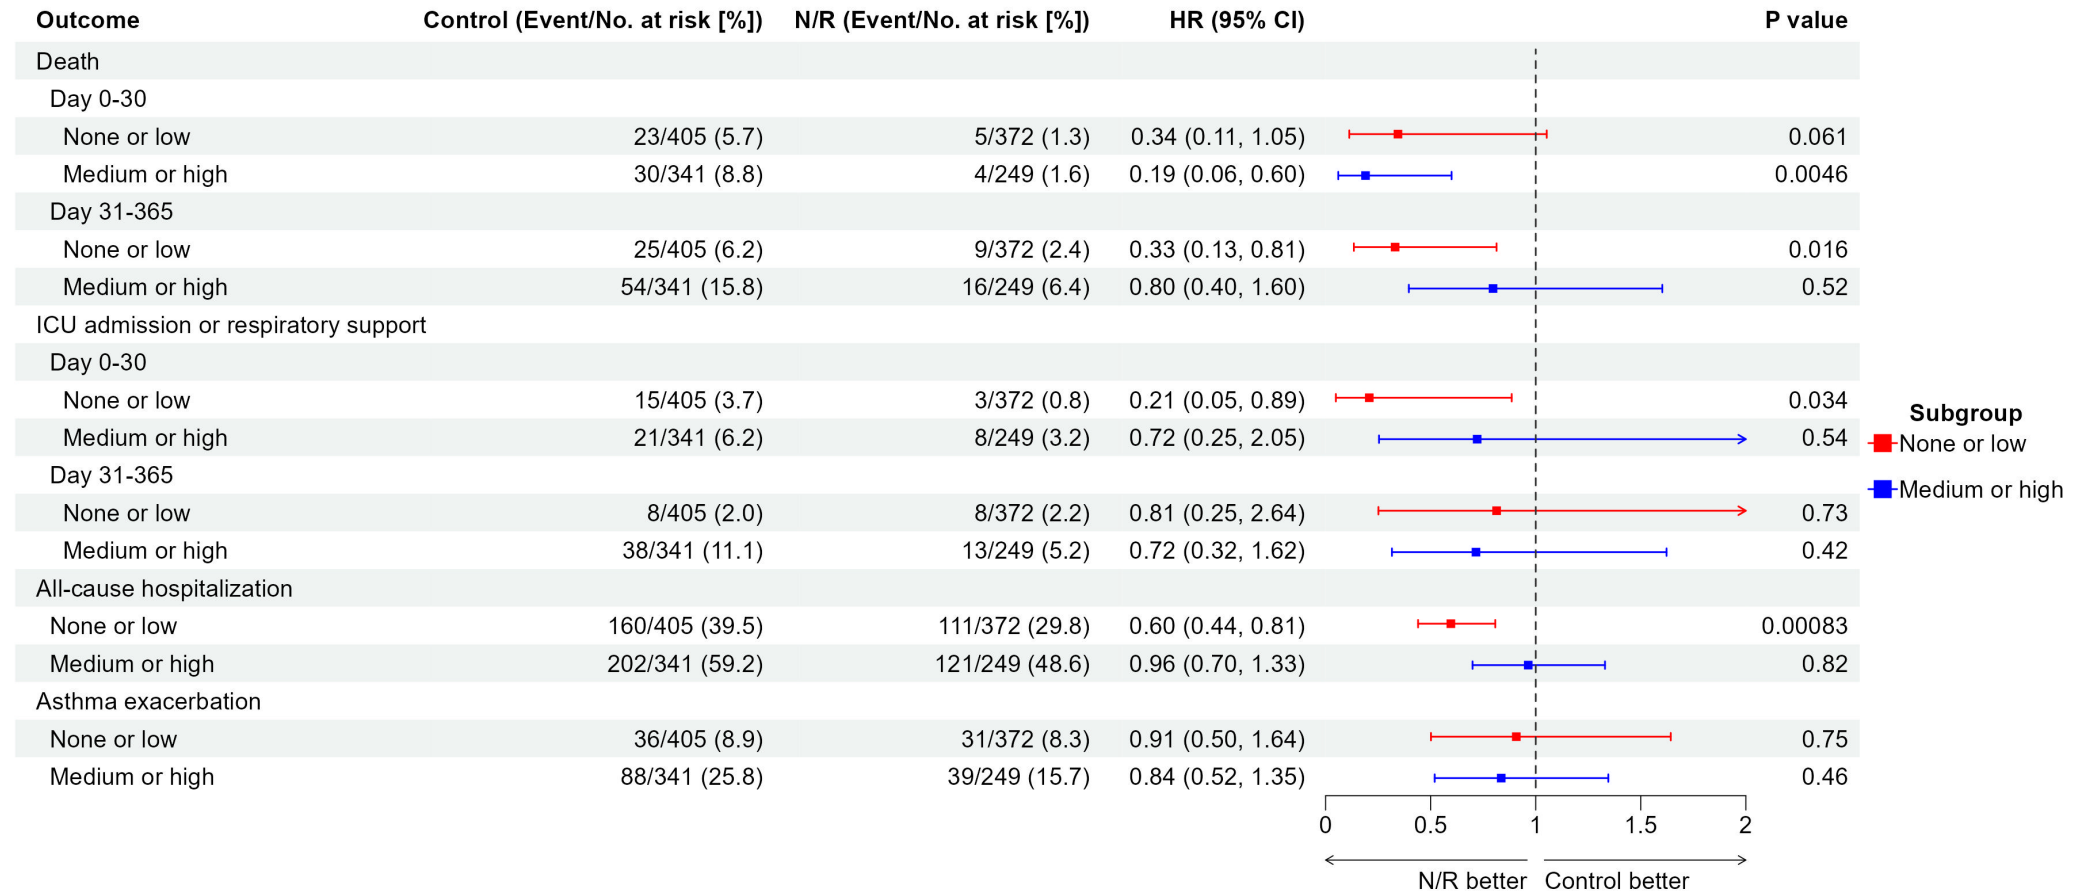

**Supplement Figure 13B. Subgroup analysis: inhaled corticosteroid (ICS) dose level in the comparison between the molnupiravir group and control group**

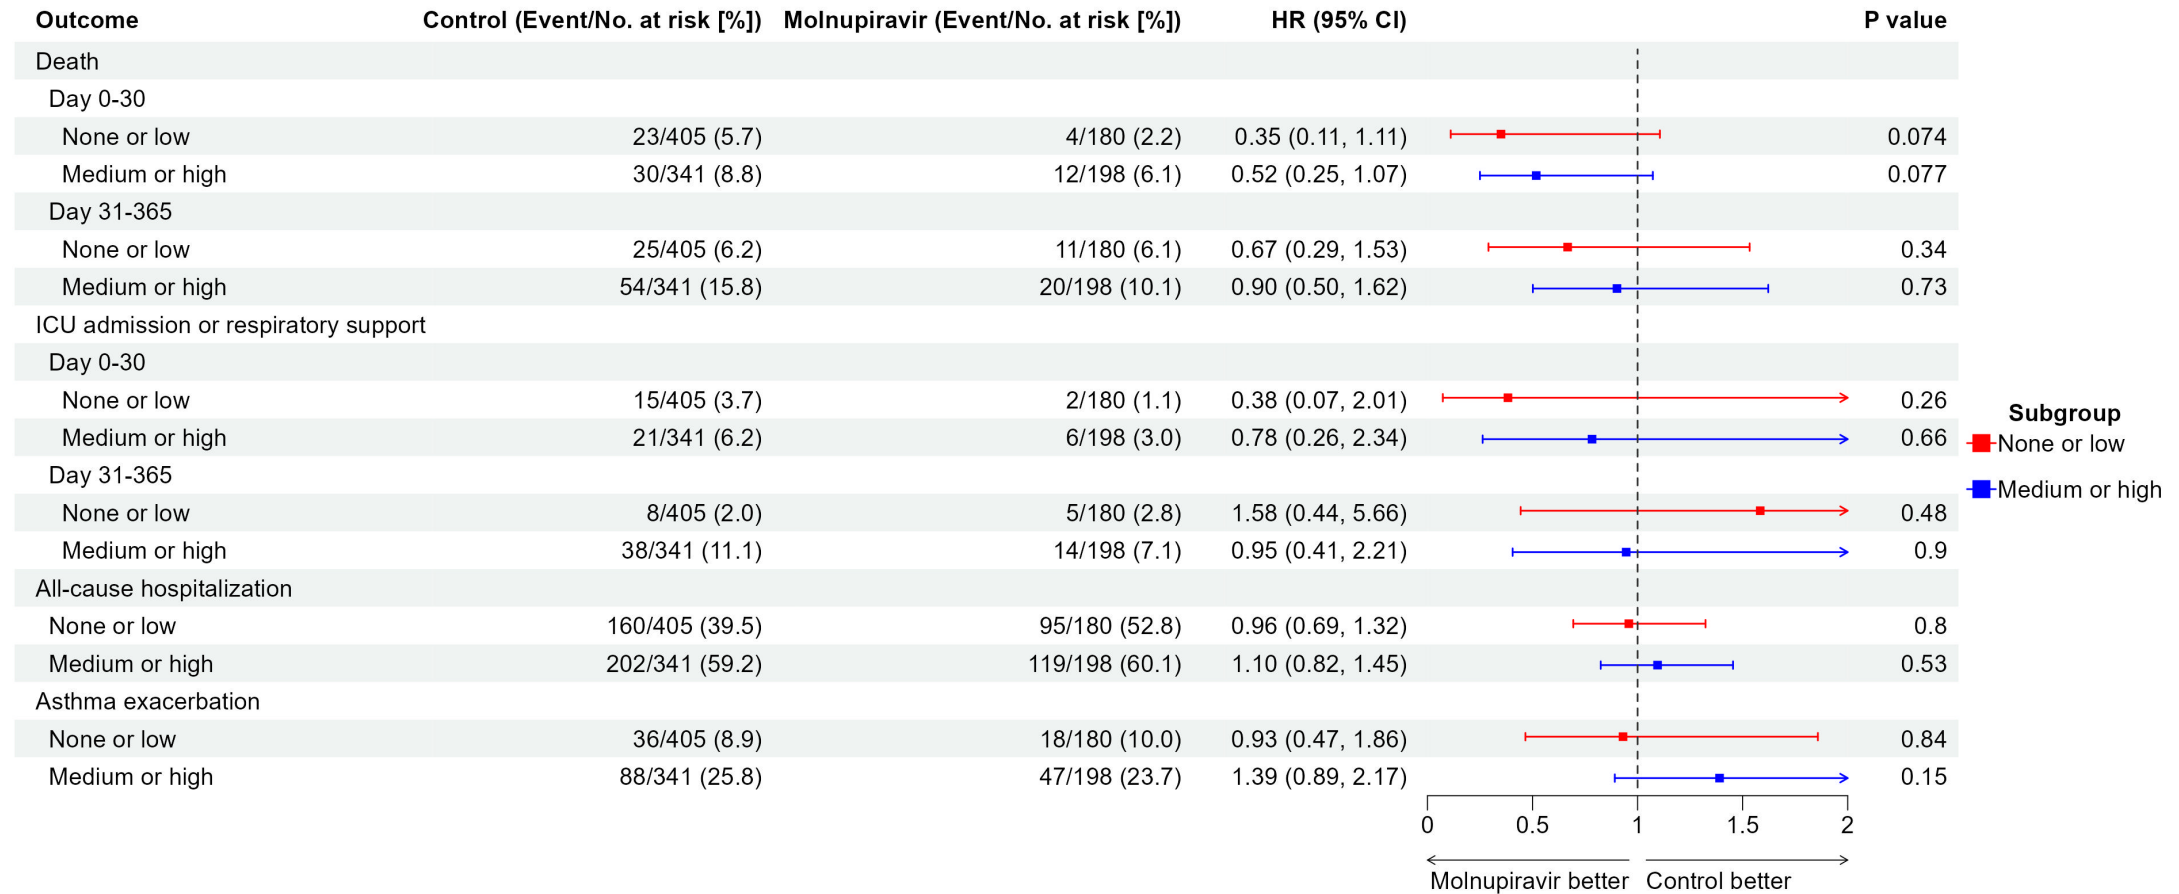



**Supplement Figure 13C. Subgroup analysis: inhaled corticosteroid (ICS) dose level in the comparison between the nirmatrelvir/ritonavir group and molnupiravir group**

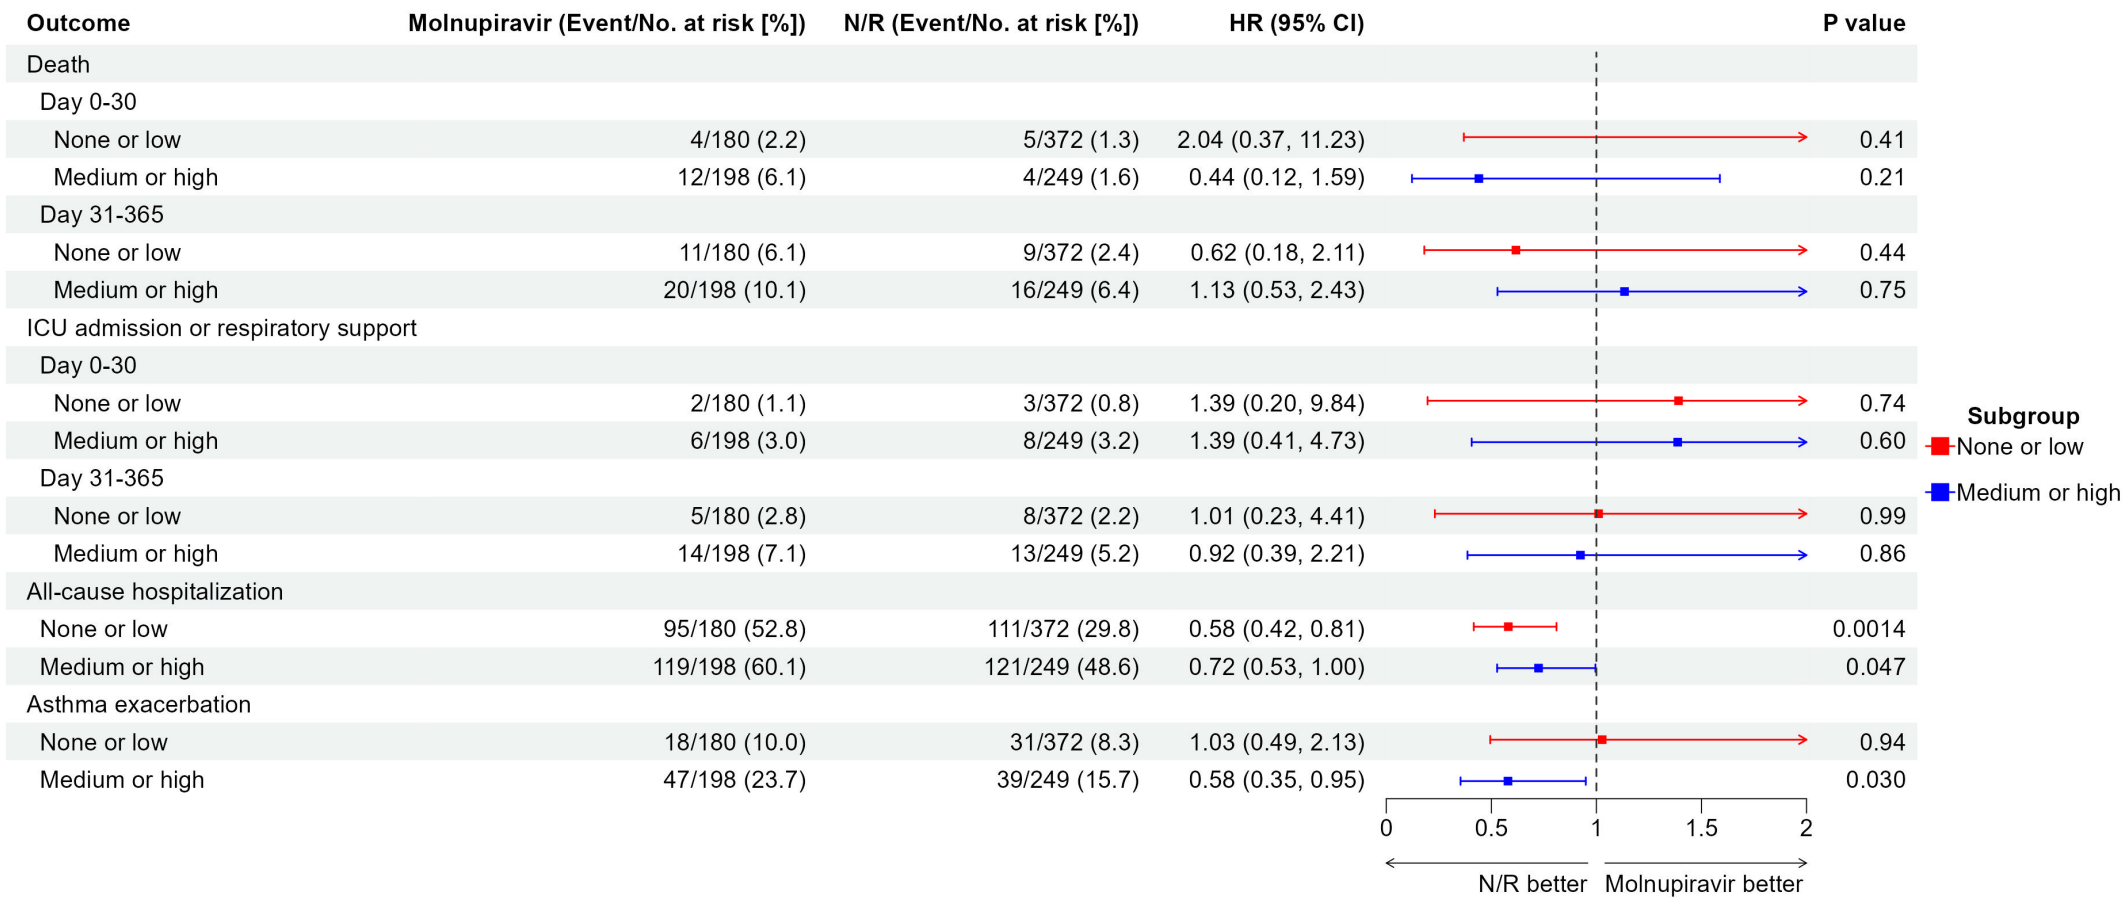

**Supplement Figure 14A. Subgroup analysis: hospital admission on index date in the comparison between the nirmatrelvir/ritonavir group and control group**

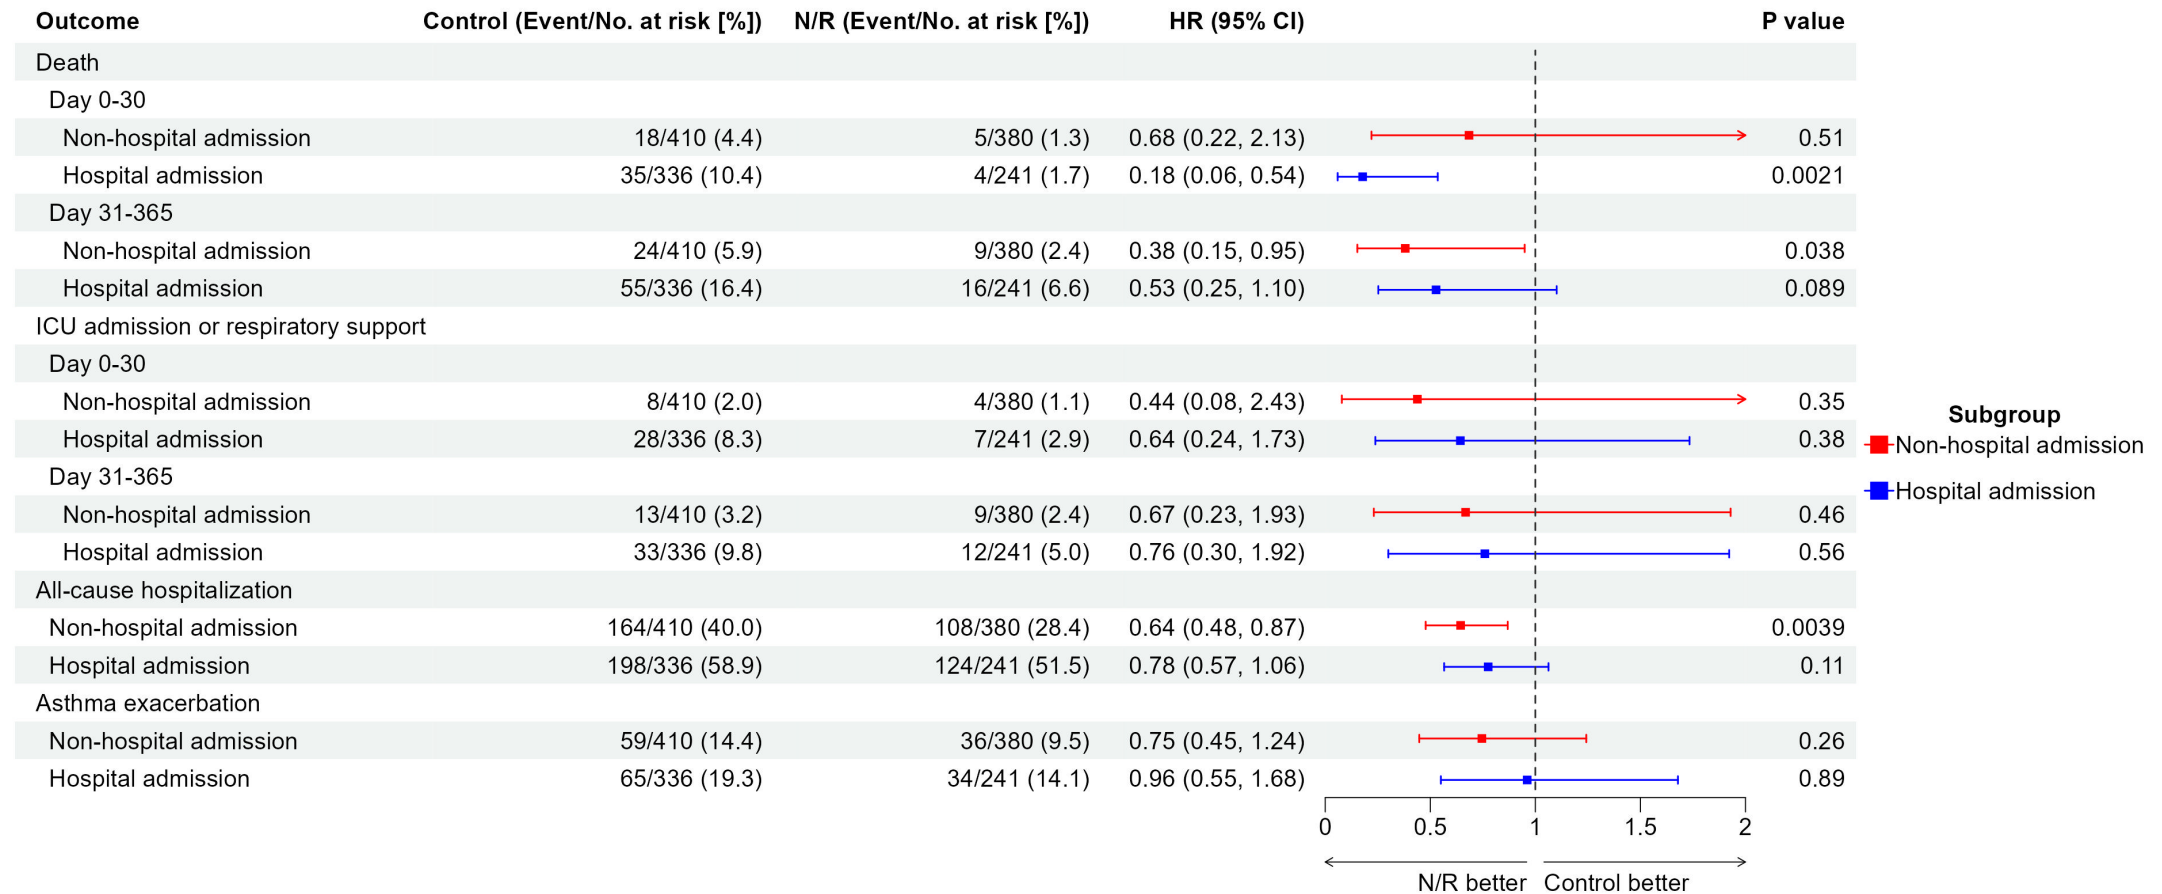

**Supplement Figure 14B. Subgroup analysis: hospital admission on index date in the comparison between the molnupiravir group and control group**

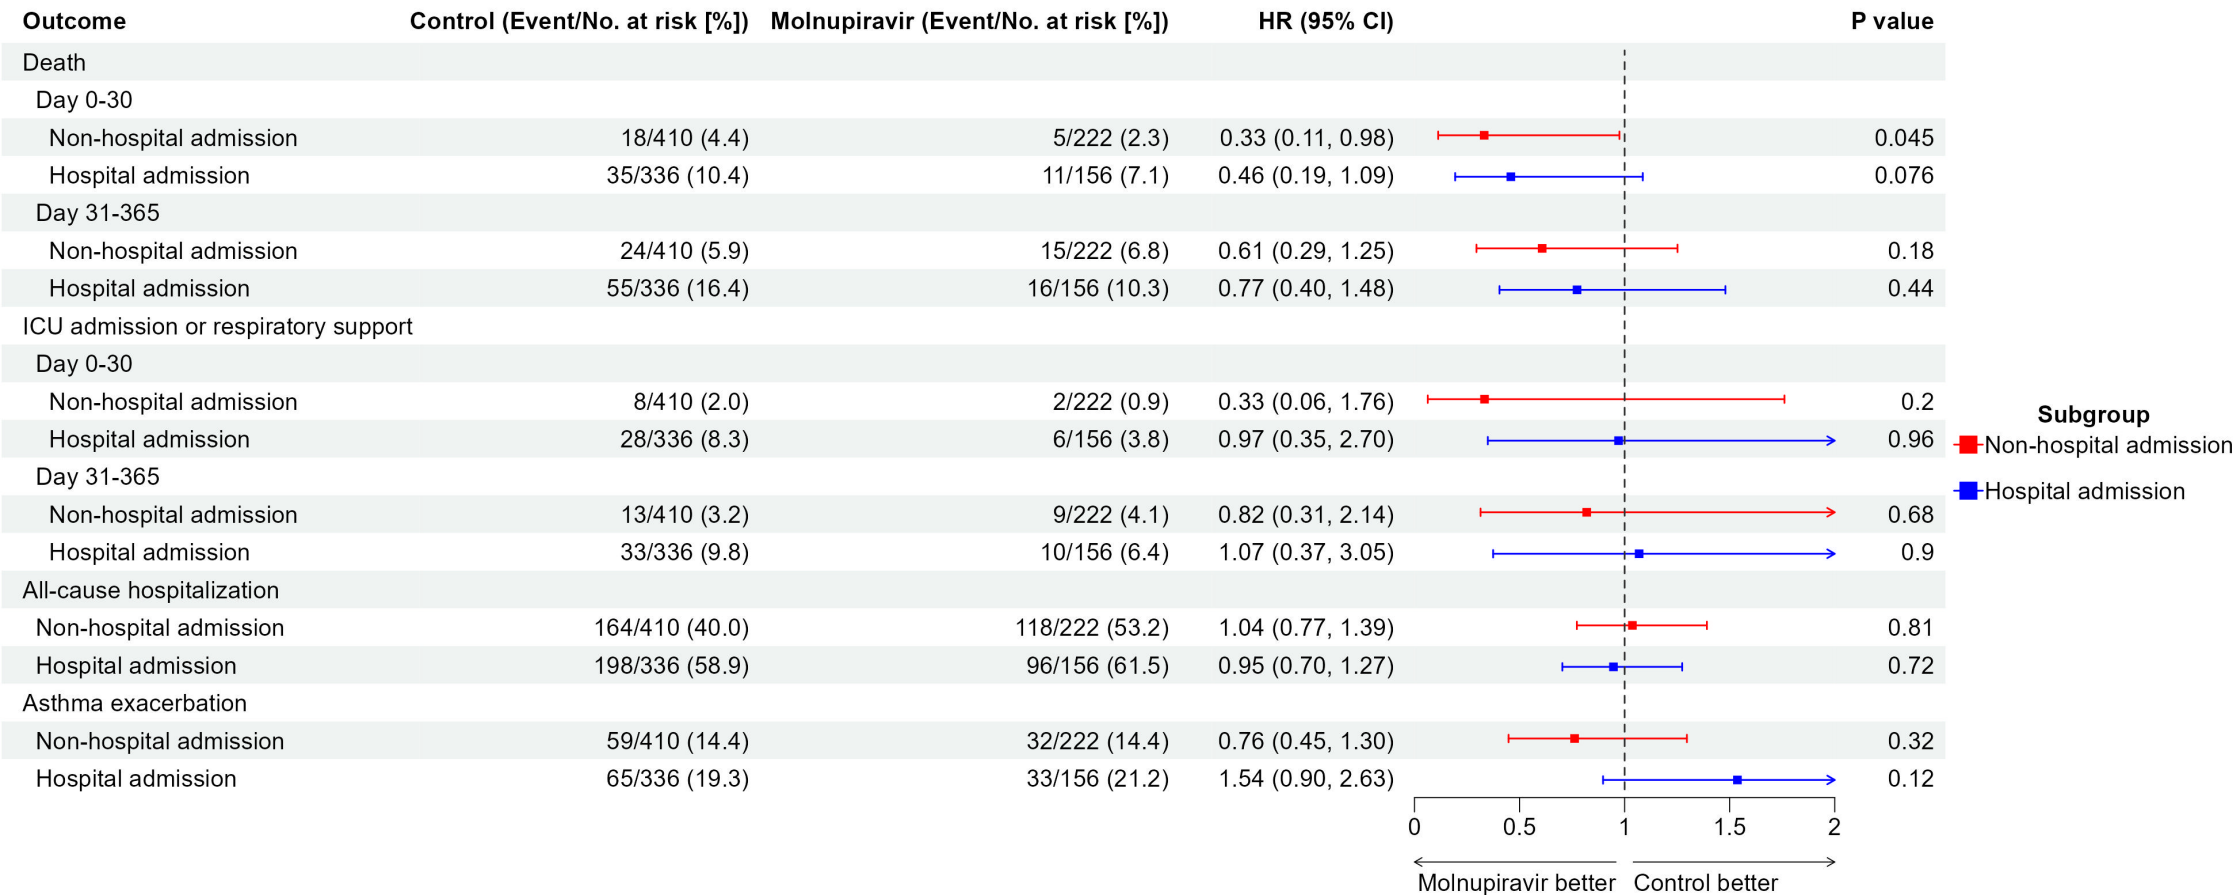

**Supplement Figure 14C. Subgroup analysis: hospital admission on index date in the comparison between the nirmatrelvir/ritonavir group and molnupiravir group**

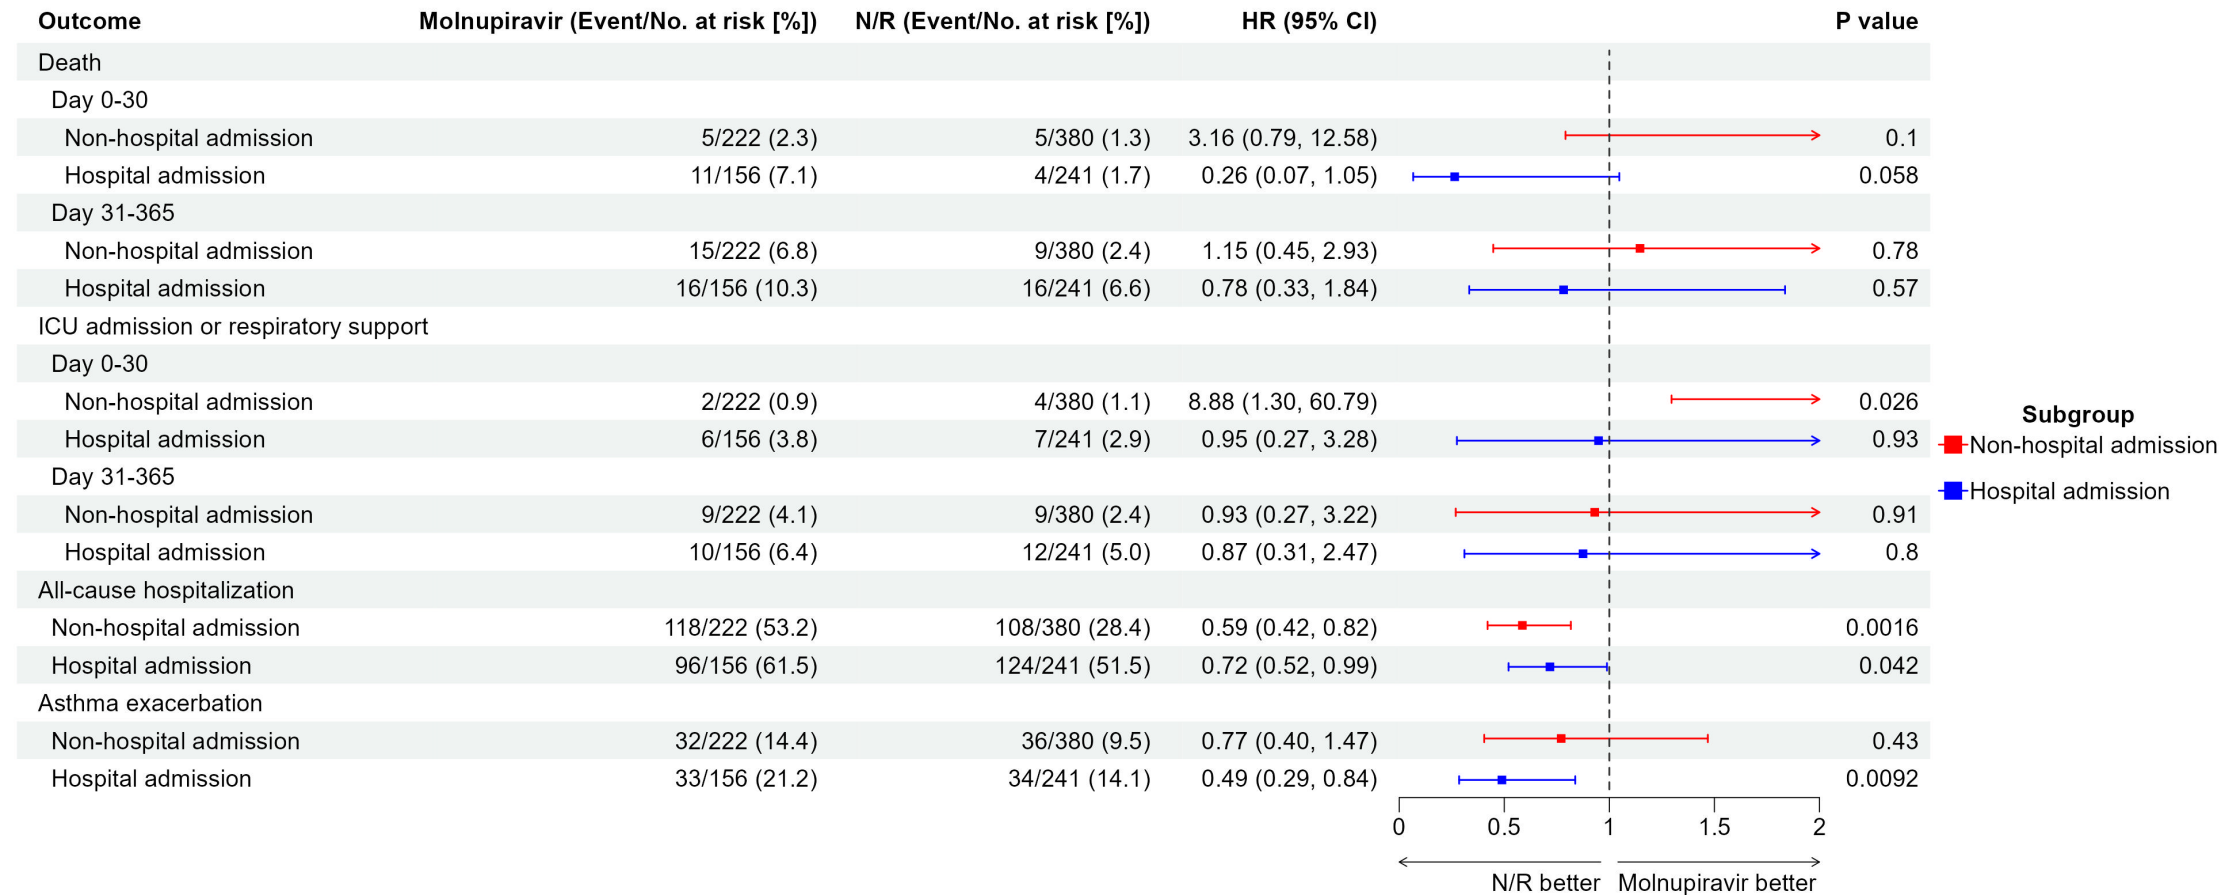

**Supplement Figure 15. Sensitivity analysis 1: Comparison between the molnupiravir group and control group with the start of the study period as the date when molnupiravir became available (Feb. 26, 2022) and without excluding individuals with contraindications to nirmatrelvir/ritonavir**

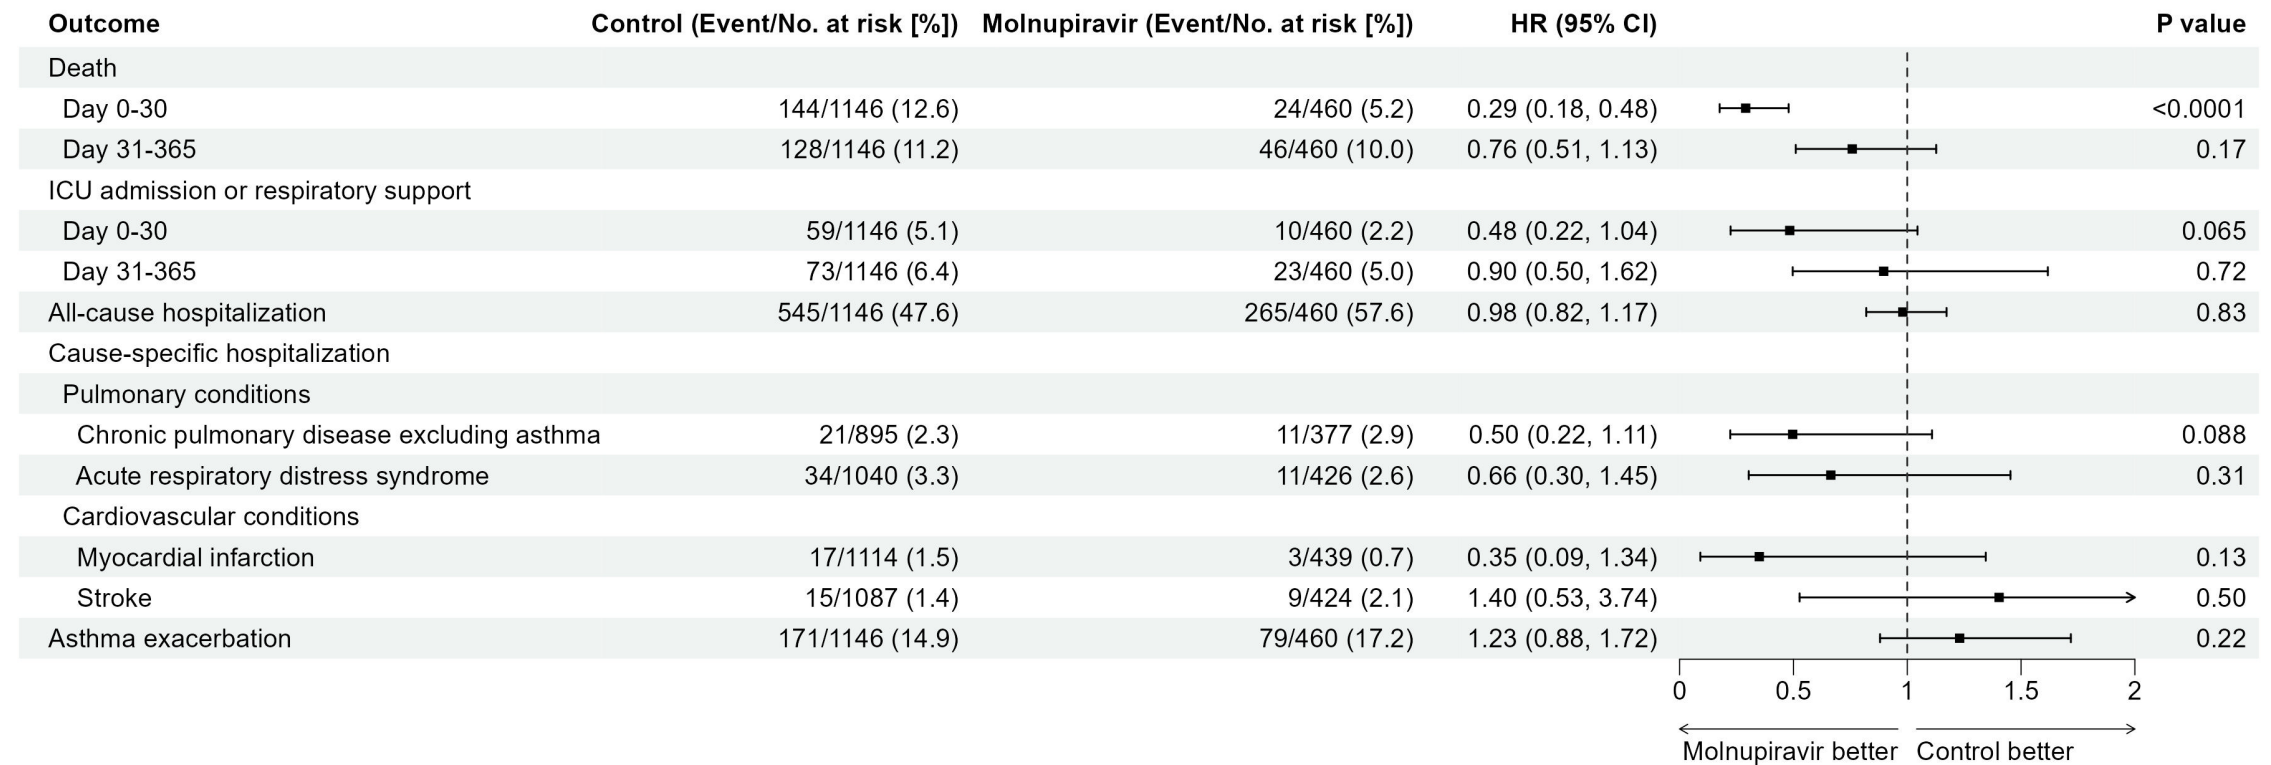

**Supplement Figure 16. Sensitivity analysis 2: Comparison between the nirmatrelvir/ritonavir group and control group excluding patients who were prescribed salmeterol within 10 days of the index date**

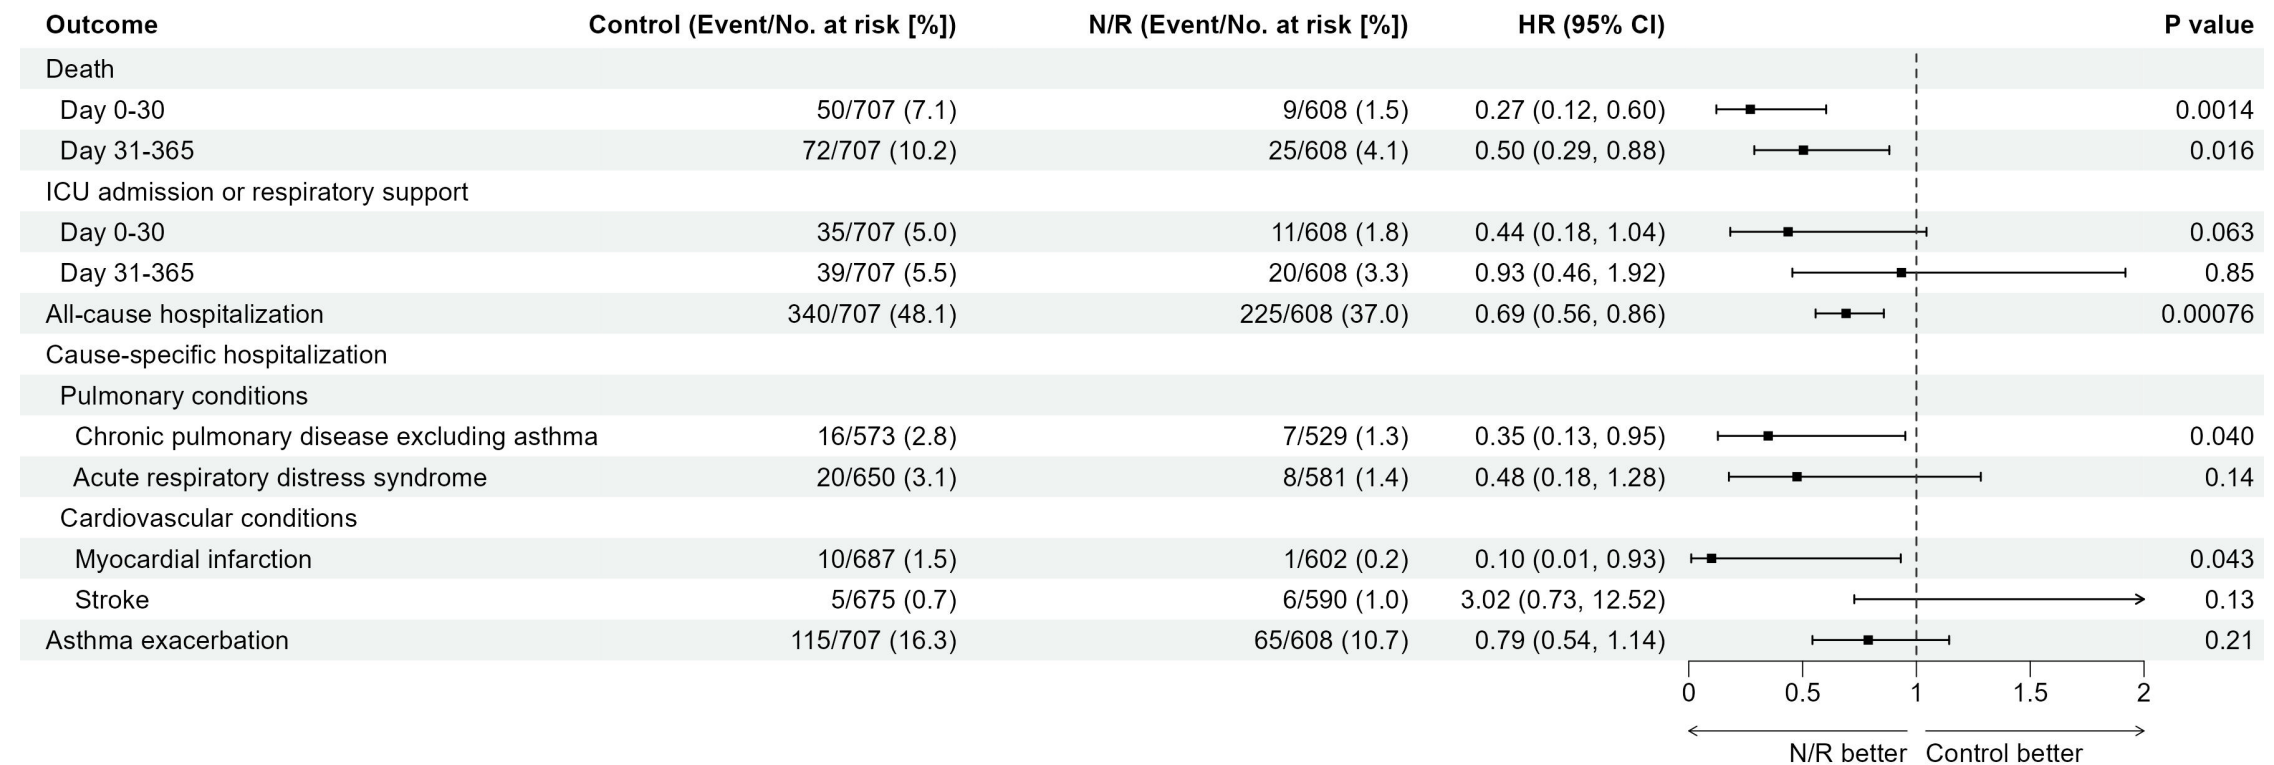

**Supplement Figure 17. Sensitivity analysis 3: Comparison between the nirmatrelvir/ritonavir group and molnupiravir group excluding patients who were prescribed salmeterol within 10 days of the index date**

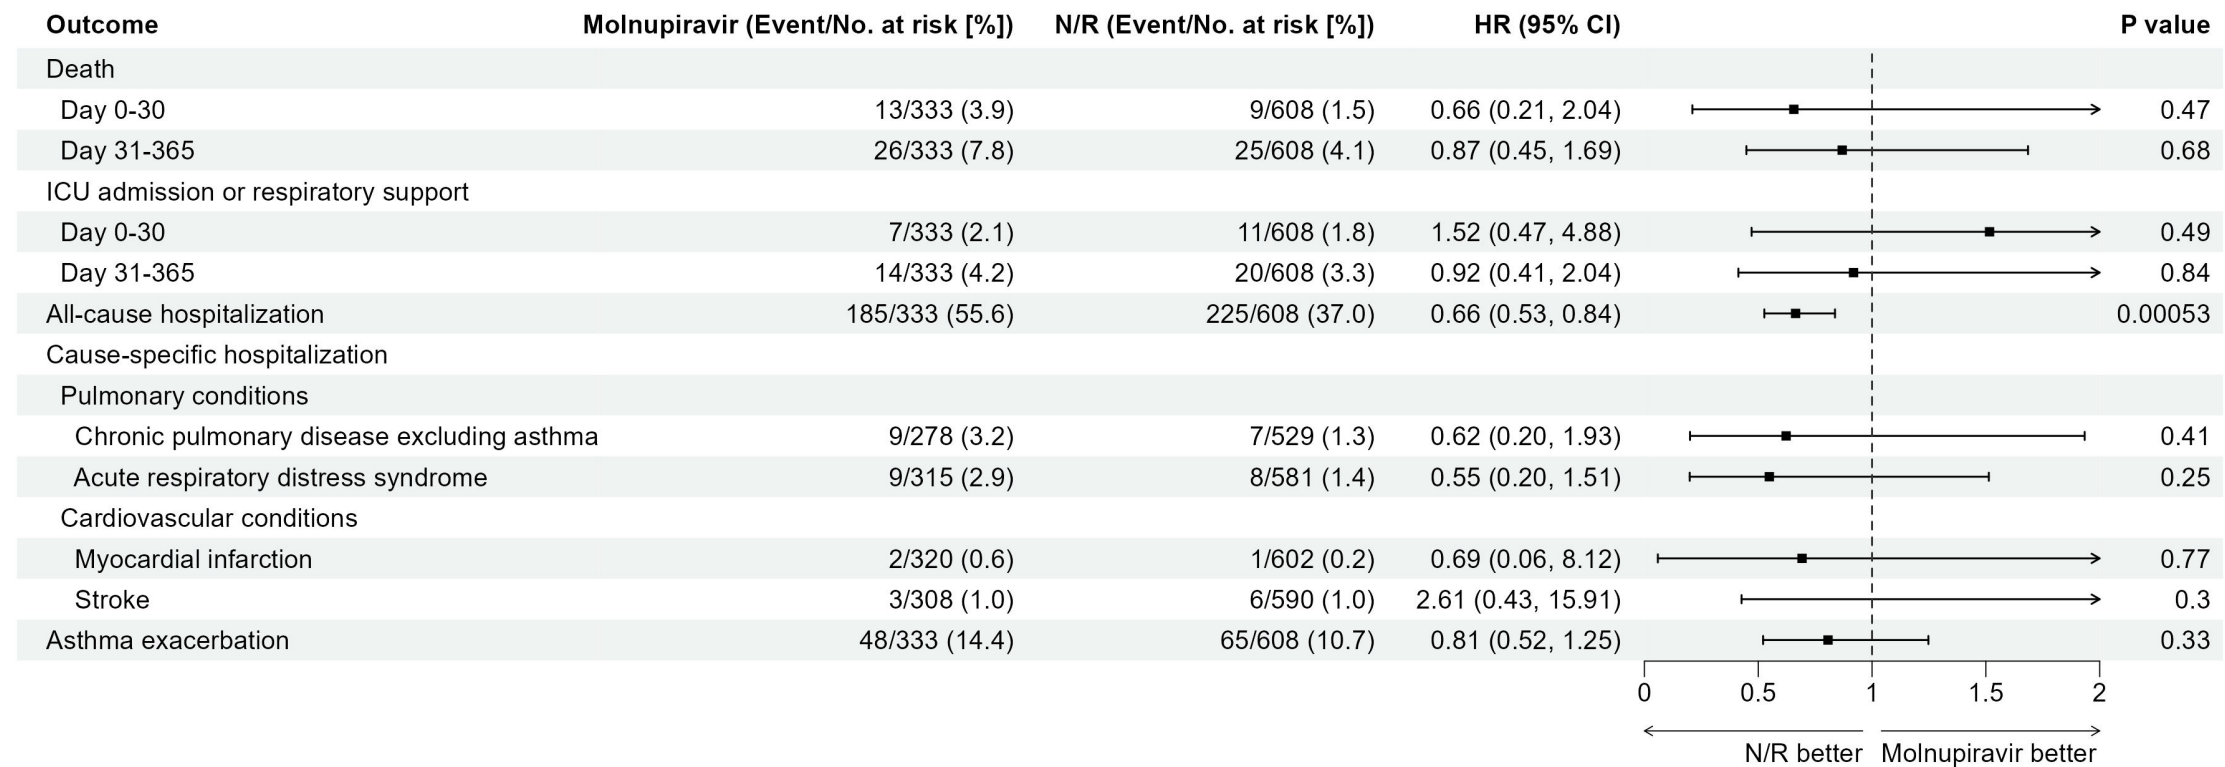

## References

1. Global Initiative for Asthma. Global Strategy for Asthma Management and Prevention, 2024. Updated May 2024. Available from: [www.ginasthma.org](http://www.ginasthma.org)
2. Lam ICH, Wong CKH, Zhang R, Chui CSL, Lai FTT, Li X, Chan EWY, Luo H, Zhang Q, Man KKC, Cheung BMY, Tang SCW, Lau CS, Wan EYF, Wong ICK. Long-term post-acute sequelae of COVID-19 infection: a retrospective, multi-database cohort study in Hong Kong and the UK. *EClinicalMedicine*. 2023 Jun;60:102000.
3. Quan H, Sundararajan V, Halfon P, Fong A, Burnand B, Luthi JC, Saunders LD, Beck CA, Feasby TE, Ghali WA. Coding algorithms for defining comorbidities in ICD-9-CM and ICD-10 administrative data. *Med Care*. 2005 Nov;43(11):1130-9. doi: 10.1097/01.mlr.0000182534.19832.83. PMID: 16224307.
